# Supplementary material for: Environmental factors and risk of aggressive prostate cancer among a population of New Zealand men – a genotypic approach
Source: Royal Society of Chemistry journal article supplement (doi:10.1039/c6mb00873a), 2017-02-21
Supplement: c6mb00873a1.xlsx [file c6mb00873a1.xlsx]

## Sheet: Agg_vs_Control_Adjusted
CHR	SNP	UNADJ	GC	BONF	HOLM	SIDAK_SS	SIDAK_SD	FDR_BH	FDR_BY
3	rs17793693	0.000173	0.0002641	0.01713	0.01713	0.01698	0.01698	0.01713	0.08868
11	rs7931342	0.0007423	0.001049	0.07349	0.07274	0.07088	0.07019	0.03674	0.1902
11	rs10896438	0.002322	0.00309	0.2299	0.2252	0.2056	0.2019	0.07662	0.3967
19	rs887391	0.005094	0.006509	0.5043	0.4891	0.3969	0.3876	0.1138	0.5893
23	rs5945619	0.005749	0.007299	0.5691	0.5461	0.4349	0.4217	0.1138	0.5893
19	rs17632542	0.008268	0.0103	0.8186	0.7772	0.5604	0.5418	0.1364	0.7063
10	rs7920517	0.01227	0.01499	1	1	0.7055	0.6828	0.1736	0.8986
11	rs11228565	0.02189	0.02597	1	1	0.8883	0.8695	0.2579	1
7	rs10244329	0.02344	0.02771	1	1	0.9045	0.8845	0.2579	1
8	rs6983561	0.02883	0.03373	1	1	0.9448	0.9281	0.2854	1
6	rs130067	0.03656	0.04227	1	1	0.975	0.9637	0.3291	1
11	rs2727270	0.04184	0.04804	1	1	0.9855	0.9767	0.3358	1
10	rs12529	0.04685	0.0535	1	1	0.9914	0.9846	0.3358	1
19	rs2659122	0.04748	0.05418	1	1	0.9919	0.9848	0.3358	1
17	rs799923	0.05671	0.06415	1	1	0.9969	0.993	0.3743	1
3	rs1799977	0.07921	0.08817	1	1	0.9997	0.999	0.49	1
8	rs6983267	0.08639	0.09576	1	1	0.9999	0.9994	0.49	1
19	rs2659056	0.08909	0.09861	1	1	0.9999	0.9995	0.49	1
15	rs28665122	0.09474	0.1046	1	1	0.9999	0.9997	0.4936	1
7	rs10486567	0.1036	0.1139	1	1	1	0.9998	0.5129	1
2	rs632148	0.1237	0.1348	1	1	1	1	0.5722	1
20	rs3918256	0.1305	0.1419	1	1	1	1	0.5722	1
5	rs2242652	0.1329	0.1444	1	1	1	1	0.5722	1
17	rs6502051	0.1667	0.1792	1	1	1	1	0.6743	1
17	rs1016990	0.174	0.1866	1	1	1	1	0.6743	1
16	rs9939609	0.1771	0.1898	1	1	1	1	0.6743	1
1	rs5845	0.1892	0.2022	1	1	1	1	0.6805	1
12	rs6823	0.1925	0.2055	1	1	1	1	0.6805	1
12	rs2071358	0.2185	0.232	1	1	1	1	0.746	1
23	rs5919432	0.2363	0.25	1	1	1	1	0.7799	1
8	rs2928679	0.2703	0.2842	1	1	1	1	0.855	1
17	rs1127678	0.2764	0.2903	1	1	1	1	0.855	1
17	rs4054823	0.3148	0.3289	1	1	1	1	0.9186	1
2	rs12621278	0.3199	0.3339	1	1	1	1	0.9186	1
19	rs1354774	0.3277	0.3417	1	1	1	1	0.9186	1
16	rs1529916	0.3358	0.3498	1	1	1	1	0.9186	1
3	rs1050450	0.358	0.3719	1	1	1	1	0.9186	1
11	rs1001179	0.3764	0.3902	1	1	1	1	0.9186	1
1	rs12042763	0.3912	0.4049	1	1	1	1	0.9186	1
12	rs3782905	0.3915	0.4052	1	1	1	1	0.9186	1
12	rs902774	0.3933	0.407	1	1	1	1	0.9186	1
2	rs10187424	0.4075	0.421	1	1	1	1	0.9186	1
17	rs17552022	0.4211	0.4345	1	1	1	1	0.9186	1
4	rs17021918	0.4212	0.4346	1	1	1	1	0.9186	1
7	rs6465657	0.432	0.4452	1	1	1	1	0.9186	1
19	rs8102476	0.433	0.4463	1	1	1	1	0.9186	1
3	rs4135275	0.4452	0.4583	1	1	1	1	0.9186	1
8	rs6470517	0.4713	0.4841	1	1	1	1	0.9186	1
8	rs1512268	0.4783	0.4909	1	1	1	1	0.9186	1
17	rs983085	0.487	0.4995	1	1	1	1	0.9186	1
5	rs2121875	0.4938	0.5062	1	1	1	1	0.9186	1
4	rs629242	0.496	0.5084	1	1	1	1	0.9186	1
8	rs2294008	0.4989	0.5113	1	1	1	1	0.9186	1
3	rs10934853	0.5157	0.5277	1	1	1	1	0.9186	1
19	rs713041	0.5195	0.5315	1	1	1	1	0.9186	1
20	rs3787557	0.5351	0.5468	1	1	1	1	0.9186	1
8	rs7000448	0.5394	0.5511	1	1	1	1	0.9186	1
17	rs1859962	0.5421	0.5537	1	1	1	1	0.9186	1
3	rs6763931	0.5475	0.559	1	1	1	1	0.9186	1
10	rs4962416	0.5648	0.576	1	1	1	1	0.9205	1
1	rs1380576	0.5887	0.5994	1	1	1	1	0.9205	1
17	rs8066956	0.6122	0.6224	1	1	1	1	0.9205	1
12	rs7299460	0.6247	0.6347	1	1	1	1	0.9205	1
12	rs2946834	0.6251	0.635	1	1	1	1	0.9205	1
8	rs1016343	0.6264	0.6363	1	1	1	1	0.9205	1
11	rs174448	0.6297	0.6395	1	1	1	1	0.9205	1
2	rs721048	0.6301	0.6399	1	1	1	1	0.9205	1
15	rs4965373	0.6323	0.642	1	1	1	1	0.9205	1
10	rs10740051	0.6483	0.6577	1	1	1	1	0.9219	1
6	rs4880	0.6531	0.6624	1	1	1	1	0.9219	1
8	rs16902094	0.6612	0.6703	1	1	1	1	0.9219	1
8	rs1378897	0.676	0.6847	1	1	1	1	0.926	1
20	rs3787268	0.6828	0.6914	1	1	1	1	0.926	1
12	rs10875943	0.713	0.7208	1	1	1	1	0.943	1
4	rs12500426	0.7487	0.7557	1	1	1	1	0.943	1
17	rs3094509	0.7563	0.7631	1	1	1	1	0.943	1
10	rs6162	0.7612	0.7678	1	1	1	1	0.943	1
20	rs2296241	0.7646	0.7711	1	1	1	1	0.943	1
12	rs2279744	0.7685	0.775	1	1	1	1	0.943	1
9	rs11536889	0.7922	0.798	1	1	1	1	0.943	1
5	rs3733890	0.7985	0.8042	1	1	1	1	0.943	1
17	rs11545302	0.8107	0.816	1	1	1	1	0.943	1
2	rs1465618	0.8169	0.8221	1	1	1	1	0.943	1
7	rs3735035	0.8191	0.8242	1	1	1	1	0.943	1
2	rs1056827	0.8431	0.8475	1	1	1	1	0.9496	1
8	rs6470494	0.8441	0.8485	1	1	1	1	0.9496	1
11	rs7127900	0.8771	0.8805	1	1	1	1	0.9511	1
8	rs13254738	0.8786	0.882	1	1	1	1	0.9511	1
4	rs7679673	0.8796	0.883	1	1	1	1	0.9511	1
19	rs1506684	0.9098	0.9124	1	1	1	1	0.9511	1
17	rs4794758	0.9099	0.9124	1	1	1	1	0.9511	1
2	rs2710647	0.9119	0.9144	1	1	1	1	0.9511	1
2	rs2292884	0.9127	0.9151	1	1	1	1	0.9511	1
20	rs2762939	0.9405	0.9422	1	1	1	1	0.9687	1
12	rs7965399	0.9491	0.9506	1	1	1	1	0.9687	1
7	rs12155172	0.9814	0.982	1	1	1	1	0.9915	1
5	rs3877899	0.9982	0.9983	1	1	1	1	0.9982	1

## Sheet: Agg_vs_Control_OR
CHR	SNP	BP	A1	F_A	F_U	A2	CHISQ	P	OR	SE	L95	U95
1	rs5845	86863156	2	0.2042	0.2415	4	1.724	0.1892	0.8058	0.1647	0.5835	1.113
1	rs12042763	186682744	2	0.2567	0.232	3	0.7352	0.3912	1.143	0.1557	0.8422	1.55
1	rs1380576	204519150	4	0.3077	0.3413	3	0.2923	0.5887	0.8579	0.2836	0.492	1.496
2	rs632148	31580962	4	0.3137	0.2651	3	2.37	0.1237	1.267	0.154	0.937	1.714
2	rs1056827	38075034	2	0.2404	0.2273	3	0.03917	0.8431	1.076	0.3717	0.5195	2.23
2	rs1465618	43326810	1	0.1961	0.2021	3	0.05359	0.8169	0.9628	0.1639	0.6983	1.327
2	rs721048	62904596	1	0.1947	0.2073	3	0.2319	0.6301	0.9249	0.1621	0.6731	1.271
2	rs2710647	63213970	2	0.4388	0.4351	4	0.01223	0.9119	1.015	0.1338	0.7808	1.319
2	rs10187424	85567174	4	0.43	0.4037	2	0.6862	0.4075	1.114	0.1306	0.8626	1.439
2	rs12621278	172446825	3	0.0625	0.0873	1	0.9895	0.3199	0.697	0.3646	0.3411	1.424
2	rs2292884	238443226	3	0.2905	0.2937	1	0.01203	0.9127	0.9847	0.1406	0.7475	1.297
3	rs17793693	12345971	1	0.08741	0.02069	4	14.1	0.000173	4.534	0.4383	1.92	10.7
3	rs4135275	12443844	3	0.2128	0.1923	1	0.5829	0.4452	1.136	0.1666	0.8192	1.574
3	rs1799977	37012077	3	0.3425	0.2884	1	3.081	0.07921	1.285	0.1432	0.9709	1.702
3	rs1050450	49357401	2	0.2932	0.3221	4	0.8448	0.358	0.8727	0.1482	0.6526	1.167
3	rs10934853	128319530	1	0.2872	0.2678	4	0.4226	0.5157	1.102	0.149	0.8227	1.475
3	rs6763931	141383991	1	0.4179	0.4368	3	0.3619	0.5475	0.9254	0.1289	0.7188	1.191
4	rs629242	56276871	2	0.2256	0.207	4	0.4636	0.496	1.116	0.1613	0.8136	1.531
4	rs12500426	94593458	1	0.4664	0.4558	4	0.1026	0.7487	1.044	0.1337	0.8031	1.356
4	rs17021918	94641726	2	0.3557	0.3307	4	0.647	0.4212	1.118	0.1382	0.8524	1.465
4	rs7679673	105140377	1	0.3463	0.3511	4	0.02295	0.8796	0.9789	0.1407	0.743	1.29
5	rs2242652	1279913	2	0.1948	0.1579	4	2.258	0.1329	1.291	0.1701	0.9248	1.801
5	rs3877899	42801166	1	0.2316	0.2315	3	4.879e-006	0.9982	1	0.1628	0.727	1.376
5	rs2121875	44365443	3	0.3604	0.3817	2	0.4682	0.4938	0.9125	0.1338	0.702	1.186
5	rs3733890	79126136	1	0.3056	0.2979	3	0.06515	0.7985	1.037	0.1429	0.7838	1.372
6	rs130067	31150734	4	0.1898	0.2447	1	4.371	0.03656	0.723	0.1555	0.533	0.9806
6	rs4880	159692840	2	0.4986	0.4832	4	0.202	0.6531	1.064	0.1373	0.8127	1.392
7	rs12155172	20954872	1	0.2145	0.2139	3	0.0005415	0.9814	1.004	0.1629	0.7294	1.381
7	rs10486567	27936944	1	0.2042	0.2473	3	2.649	0.1036	0.7809	0.1521	0.5796	1.052
7	rs6465657	98187015	4	0.4547	0.4808	2	0.6175	0.432	0.9006	0.1333	0.6935	1.169
7	rs10244329	128248636	2	0.5138	0.4044	1	5.135	0.02344	1.557	0.1961	1.06	2.286
7	rs3735035	131195959	2	0.4743	0.4667	4	0.05228	0.8191	1.031	0.1343	0.7926	1.342
8	rs2928679	23438975	2	0.4883	0.4521	4	1.215	0.2703	1.157	0.1319	0.893	1.498
8	rs1512268	23668950	1	0.3939	0.4171	3	0.5028	0.4783	0.9083	0.1357	0.6962	1.185
8	rs1016343	127081052	2	0.2306	0.2168	4	0.237	0.6264	1.083	0.1642	0.7852	1.494
8	rs13254738	127092098	4	0.3217	0.3169	1	0.02335	0.8786	1.022	0.1423	0.7732	1.351
8	rs6983561	127094635	4	0.03833	0.06989	1	4.778	0.02883	0.5305	0.2942	0.298	0.9443
8	rs1378897	127110414	1	0.0602	0.05376	3	0.1747	0.676	1.127	0.2871	0.6423	1.979
8	rs16902094	127308101	3	0.15	0.1398	1	0.1921	0.6612	1.086	0.1882	0.7509	1.57
8	rs6983267	127401060	2	0.4819	0.4259	3	2.94	0.08639	1.254	0.1319	0.968	1.624
8	rs7000448	127428925	2	0.3797	0.3599	4	0.3766	0.5394	1.089	0.1383	0.8301	1.427
8	rs6470517	127448159	3	0.1394	0.1568	1	0.5189	0.4713	0.8708	0.1921	0.5976	1.269
8	rs6470494	128087904	2	0.3098	0.3038	4	0.03869	0.8441	1.029	0.1435	0.7765	1.363
8	rs2294008	142680513	2	0.4343	0.4121	4	0.4572	0.4989	1.095	0.1349	0.841	1.427
9	rs11536889	117715853	4	0.1611	0.1676	3	0.06942	0.7922	0.9542	0.1779	0.6732	1.352
10	rs12529	5136651	3	0.3609	0.4223	4	3.951	0.04685	0.7725	0.13	0.5987	0.9967
10	rs10740051	46025670	1	0.2828	0.2692	3	0.2081	0.6483	1.07	0.1492	0.799	1.434
10	rs7920517	46063201	3	0.4303	0.514	1	6.271	0.01227	0.7142	0.1346	0.5486	0.9298
10	rs6162	102837224	1	0.3844	0.375	3	0.09239	0.7612	1.041	0.1312	0.8047	1.346
10	rs4962416	125008303	4	0.2576	0.2737	2	0.3314	0.5648	0.9209	0.1431	0.6957	1.219
11	rs7127900	2212344	1	0.2416	0.246	3	0.02393	0.8771	0.9765	0.1535	0.7228	1.319
11	rs1001179	34438684	2	0.2163	0.2416	4	0.7824	0.3764	0.8661	0.1626	0.6297	1.191
11	rs2727270	61603237	2	0.09046	0.1317	4	4.142	0.04184	0.6556	0.2086	0.4356	0.9867
11	rs174448	61872101	4	0.3602	0.375	2	0.2325	0.6297	0.9384	0.1318	0.7248	1.215
11	rs10896438	69139102	3	0.3037	0.3953	2	9.276	0.002322	0.6673	0.1331	0.5141	0.8663
11	rs11228565	69211113	1	0.1898	0.2513	3	5.254	0.02189	0.6977	0.1575	0.5125	0.95
11	rs7931342	69227030	2	0.5333	0.422	3	11.38	0.0007423	1.565	0.1331	1.206	2.032
12	rs3782905	47872384	3	0.3362	0.3082	4	0.7341	0.3915	1.137	0.1499	0.8475	1.525
12	rs7299460	48296268	2	0.3299	0.314	4	0.2393	0.6247	1.075	0.1483	0.804	1.438
12	rs6823	48362412	3	0.4798	0.4365	4	1.699	0.1925	1.191	0.1341	0.9157	1.549
12	rs2071358	48366449	1	0.1318	0.1603	4	1.514	0.2185	0.7948	0.187	0.5509	1.146
12	rs10875943	49282227	4	0.2923	0.3032	2	0.1353	0.713	0.9493	0.1415	0.7193	1.253
12	rs902774	52880120	1	0.1332	0.1526	3	0.7286	0.3933	0.8533	0.186	0.5926	1.229
12	rs2279744	68808800	3	0.3495	0.34	2	0.08661	0.7685	1.043	0.1426	0.7885	1.379
12	rs2946834	102394036	2	0.3107	0.2963	4	0.2388	0.6251	1.07	0.1394	0.8145	1.407
12	rs7965399	102497908	4	0.03951	0.04032	2	0.004068	0.9491	0.9791	0.3309	0.5119	1.873
15	rs28665122	101277522	1	0.1349	0.09655	3	2.792	0.09474	1.46	0.2274	0.9348	2.279
15	rs4965373	101812395	1	0.3274	0.3121	3	0.229	0.6323	1.073	0.1476	0.8035	1.433
16	rs1529916	8897333	2	0.326	0.2961	4	0.9262	0.3358	1.15	0.1452	0.8651	1.529
16	rs9939609	53786615	1	0.3574	0.4005	2	1.822	0.1771	0.8323	0.136	0.6376	1.087
17	rs11545302	12899963	3	0.3107	0.3187	1	0.0574	0.8107	0.9636	0.1549	0.7113	1.305
17	rs17552022	12994978	4	0.1261	0.1094	2	0.6472	0.4211	1.175	0.2009	0.7927	1.742
17	rs4054823	13721707	4	0.4214	0.4543	2	1.01	0.3148	0.8749	0.133	0.674	1.135
17	rs3094509	37702294	2	0.3507	0.3413	4	0.0963	0.7563	1.043	0.1347	0.8008	1.358
17	rs4794758	37720433	2	0.256	0.2592	4	0.01282	0.9099	0.9835	0.1466	0.7379	1.311
17	rs1016990	37728924	3	0.3642	0.3229	4	1.848	0.174	1.201	0.1347	0.9222	1.564
17	rs799923	41251931	1	0.1919	0.241	3	3.631	0.05671	0.7476	0.1529	0.554	1.009
17	rs983085	69212061	3	0.4636	0.4865	1	0.4832	0.487	0.9122	0.1322	0.704	1.182
17	rs1859962	71112612	3	0.45	0.4701	2	0.3716	0.5421	0.9222	0.1328	0.7108	1.196
17	rs8066956	80034443	2	0.2081	0.1944	4	0.257	0.6122	1.088	0.1671	0.7844	1.51
17	rs6502051	80059332	1	0.4508	0.4054	4	1.912	0.1667	1.204	0.1344	0.9253	1.567
17	rs1127678	82101611	1	0.2093	0.254	3	1.185	0.2764	0.7776	0.2315	0.4939	1.224
19	rs713041	1106616	2	0.4444	0.4664	4	0.4149	0.5195	0.9151	0.1377	0.6986	1.199
19	rs8102476	38244973	2	0.4613	0.4355	4	0.6147	0.433	1.11	0.1331	0.8551	1.441
19	rs887391	41479716	4	0.25	0.173	2	7.846	0.005094	1.594	0.1672	1.148	2.212
19	rs2659056	50832687	3	0.3077	0.2568	1	2.891	0.08909	1.287	0.1484	0.9619	1.721
19	rs17632542	50858501	4	0.04143	0.07949	2	6.974	0.008268	0.5005	0.2665	0.2969	0.8438
19	rs1354774	50889862	4	0.3415	0.3711	2	0.9581	0.3277	0.8787	0.1321	0.6783	1.138
19	rs2659122	51363026	3	0.2308	0.2876	1	3.928	0.04748	0.743	0.1501	0.5536	0.9972
19	rs1506684	51371419	2	0.4307	0.427	4	0.01283	0.9098	1.015	0.1339	0.7809	1.32
20	rs3918256	44640959	3	0.3866	0.4342	1	2.286	0.1305	0.8211	0.1304	0.6359	1.06
20	rs3787268	46013092	1	0.1897	0.2033	3	0.167	0.6828	0.9175	0.2107	0.6071	1.387
20	rs3787557	52783135	4	0.1208	0.1344	2	0.3848	0.5351	0.8849	0.1972	0.6012	1.302
20	rs2762939	54164712	4	0.2573	0.2552	3	0.005571	0.9405	1.011	0.1491	0.755	1.354
20	rs2296241	54169680	3	0.4686	0.4785	1	0.08969	0.7646	0.9613	0.1319	0.7423	1.245
23	rs5945619	51498820	4	0.3367	0.4624	2	7.627	0.005749	0.5902	0.1916	0.4055	0.8592
23	rs5919432	67801708	4	0.2	0.2447	2	1.402	0.2363	0.7717	0.2191	0.5023	1.186

## Sheet: Agg_vs_NAgg_Adjusted
CHR	SNP	UNADJ	GC	BONF	HOLM	SIDAK_SS	SIDAK_SD	FDR_BH	FDR_BY
2	rs632148	0.01731	0.02577	1	1	0.8225	0.8225	0.5316	1
19	rs887391	0.02063	0.03013	1	1	0.873	0.8703	0.5316	1
9	rs11536889	0.02251	0.03256	1	1	0.895	0.8901	0.5316	1
2	rs2292884	0.02614	0.03721	1	1	0.9274	0.9214	0.5316	1
7	rs3735035	0.03126	0.04363	1	1	0.9569	0.9511	0.5316	1
7	rs10244329	0.03222	0.04482	1	1	0.9609	0.954	0.5316	1
19	rs17632542	0.04647	0.06215	1	1	0.991	0.988	0.5598	1
20	rs3918256	0.04959	0.06586	1	1	0.9935	0.9907	0.5598	1
17	rs8066956	0.05089	0.0674	1	1	0.9943	0.9914	0.5598	1
15	rs4965373	0.06381	0.08251	1	1	0.9985	0.9974	0.5868	1
8	rs16902094	0.0652	0.08411	1	1	0.9987	0.9975	0.5868	1
6	rs130067	0.07399	0.09419	1	1	0.9995	0.9988	0.6104	1
11	rs2727270	0.08266	0.104	1	1	0.9998	0.9995	0.6295	1
8	rs2294008	0.1078	0.132	1	1	1	0.9999	0.7218	1
19	rs713041	0.1094	0.1336	1	1	1	0.9999	0.7218	1
11	rs10896438	0.1243	0.1499	1	1	1	1	0.7606	1
11	rs11228565	0.1306	0.1567	1	1	1	1	0.7606	1
8	rs6983267	0.1686	0.1972	1	1	1	1	0.8802	1
19	rs2659122	0.1796	0.2087	1	1	1	1	0.8802	1
17	rs983085	0.2009	0.2309	1	1	1	1	0.8802	1
11	rs7931342	0.2052	0.2353	1	1	1	1	0.8802	1
12	rs7299460	0.2138	0.2442	1	1	1	1	0.8802	1
3	rs17793693	0.2187	0.2493	1	1	1	1	0.8802	1
10	rs10740051	0.2489	0.2801	1	1	1	1	0.8802	1
17	rs11545302	0.2838	0.3154	1	1	1	1	0.8802	1
17	rs4794758	0.2913	0.3229	1	1	1	1	0.8802	1
19	rs1506684	0.3032	0.3348	1	1	1	1	0.8802	1
17	rs799923	0.3237	0.3552	1	1	1	1	0.8802	1
8	rs6470494	0.3276	0.3591	1	1	1	1	0.8802	1
2	rs1465618	0.3281	0.3596	1	1	1	1	0.8802	1
4	rs12500426	0.3323	0.3638	1	1	1	1	0.8802	1
4	rs17021918	0.3334	0.3649	1	1	1	1	0.8802	1
8	rs1016343	0.3347	0.3661	1	1	1	1	0.8802	1
8	rs6983561	0.3387	0.3701	1	1	1	1	0.8802	1
15	rs28665122	0.3551	0.3863	1	1	1	1	0.8802	1
11	rs7127900	0.3623	0.3935	1	1	1	1	0.8802	1
19	rs1354774	0.3626	0.3937	1	1	1	1	0.8802	1
2	rs12621278	0.3685	0.3996	1	1	1	1	0.8802	1
12	rs2071358	0.3717	0.4027	1	1	1	1	0.8802	1
8	rs6470517	0.3736	0.4046	1	1	1	1	0.8802	1
17	rs17552022	0.3737	0.4046	1	1	1	1	0.8802	1
17	rs1859962	0.376	0.4069	1	1	1	1	0.8802	1
16	rs9939609	0.3869	0.4176	1	1	1	1	0.8802	1
5	rs2242652	0.3921	0.4227	1	1	1	1	0.8802	1
17	rs1127678	0.4091	0.4394	1	1	1	1	0.8802	1
12	rs10875943	0.4233	0.4532	1	1	1	1	0.8802	1
8	rs1378897	0.4405	0.4699	1	1	1	1	0.8802	1
3	rs10934853	0.4477	0.4769	1	1	1	1	0.8802	1
16	rs1529916	0.4696	0.4981	1	1	1	1	0.8802	1
12	rs3782905	0.471	0.4995	1	1	1	1	0.8802	1
19	rs2659056	0.472	0.5004	1	1	1	1	0.8802	1
10	rs6162	0.4722	0.5007	1	1	1	1	0.8802	1
20	rs2762939	0.4903	0.5181	1	1	1	1	0.8802	1
23	rs5945619	0.4958	0.5235	1	1	1	1	0.8802	1
3	rs6763931	0.4961	0.5237	1	1	1	1	0.8802	1
8	rs2928679	0.4979	0.5255	1	1	1	1	0.8802	1
3	rs1050450	0.5149	0.5418	1	1	1	1	0.8895	1
10	rs12529	0.5211	0.5478	1	1	1	1	0.8895	1
8	rs7000448	0.5349	0.561	1	1	1	1	0.8975	1
5	rs3877899	0.5639	0.5888	1	1	1	1	0.9131	1
20	rs2296241	0.5733	0.5978	1	1	1	1	0.9131	1
3	rs4135275	0.5747	0.5991	1	1	1	1	0.9131	1
2	rs2710647	0.5863	0.6101	1	1	1	1	0.9131	1
2	rs721048	0.5903	0.614	1	1	1	1	0.9131	1
5	rs3733890	0.61	0.6328	1	1	1	1	0.9174	1
20	rs3787557	0.6131	0.6357	1	1	1	1	0.9174	1
5	rs2121875	0.6378	0.6592	1	1	1	1	0.9174	1
4	rs629242	0.6527	0.6734	1	1	1	1	0.9174	1
10	rs7920517	0.6721	0.6917	1	1	1	1	0.9174	1
11	rs174448	0.6953	0.7137	1	1	1	1	0.9174	1
17	rs3094509	0.6964	0.7147	1	1	1	1	0.9174	1
1	rs12042763	0.7039	0.7218	1	1	1	1	0.9174	1
12	rs2279744	0.7256	0.7423	1	1	1	1	0.9174	1
17	rs6502051	0.7303	0.7468	1	1	1	1	0.9174	1
3	rs1799977	0.7333	0.7495	1	1	1	1	0.9174	1
2	rs1056827	0.7409	0.7567	1	1	1	1	0.9174	1
19	rs8102476	0.7667	0.781	1	1	1	1	0.9174	1
20	rs3787268	0.7698	0.784	1	1	1	1	0.9174	1
7	rs12155172	0.7923	0.8051	1	1	1	1	0.9174	1
12	rs2946834	0.7965	0.8091	1	1	1	1	0.9174	1
6	rs4880	0.7979	0.8104	1	1	1	1	0.9174	1
12	rs7965399	0.8008	0.8132	1	1	1	1	0.9174	1
12	rs6823	0.8081	0.8201	1	1	1	1	0.9174	1
2	rs10187424	0.8092	0.8211	1	1	1	1	0.9174	1
23	rs5919432	0.8475	0.857	1	1	1	1	0.9174	1
17	rs4054823	0.8525	0.8617	1	1	1	1	0.9174	1
12	rs902774	0.8531	0.8623	1	1	1	1	0.9174	1
8	rs1512268	0.8572	0.8662	1	1	1	1	0.9174	1
8	rs13254738	0.8578	0.8667	1	1	1	1	0.9174	1
7	rs6465657	0.859	0.8678	1	1	1	1	0.9174	1
10	rs4962416	0.8665	0.8748	1	1	1	1	0.9174	1
11	rs1001179	0.8809	0.8884	1	1	1	1	0.9174	1
17	rs1016990	0.8824	0.8898	1	1	1	1	0.9174	1
7	rs10486567	0.8896	0.8965	1	1	1	1	0.9174	1
1	rs1380576	0.9361	0.9401	1	1	1	1	0.9554	1
1	rs5845	0.95	0.9531	1	1	1	1	0.9597	1
4	rs7679673	0.9688	0.9707	1	1	1	1	0.9688	1

## Sheet: Agg_vs_NAgg_OR
CHR	SNP	BP	A1	F_A	F_U	A2	CHISQ	P	OR	SE	L95	U95
1	rs5845	86863156	2	0.2447	0.2415	4	0.003934	0.95	1.017	0.2759	0.5925	1.747
1	rs12042763	186682744	2	0.25	0.232	3	0.1444	0.7039	1.103	0.2584	0.6648	1.831
1	rs1380576	204519150	4	0.3478	0.3413	3	0.006427	0.9361	1.029	0.3621	0.5062	2.093
2	rs632148	31580962	4	0.3936	0.2651	3	5.665	0.01731	1.799	0.2486	1.105	2.929
2	rs1056827	38075034	2	0.1875	0.2273	3	0.1094	0.7409	0.7846	0.7346	0.1859	3.311
2	rs1465618	43326810	1	0.2455	0.2021	3	0.9565	0.3281	1.284	0.2561	0.7774	2.121
2	rs721048	62904596	1	0.1842	0.2073	3	0.2899	0.5903	0.8637	0.2723	0.5065	1.473
2	rs2710647	63213970	2	0.4643	0.4351	4	0.2962	0.5863	1.125	0.2165	0.7359	1.72
2	rs10187424	85567174	4	0.3909	0.4037	2	0.0583	0.8092	0.9478	0.222	0.6134	1.465
2	rs12621278	172446825	3	0.04545	0.0873	1	0.8086	0.3685	0.4978	0.7896	0.1059	2.34
2	rs2292884	238443226	3	0.1875	0.2937	1	4.946	0.02614	0.5551	0.2671	0.3288	0.937
3	rs17793693	12345971	1	0.04444	0.02069	4	1.513	0.2187	2.202	0.6571	0.6073	7.981
3	rs4135275	12443844	3	0.217	0.1923	1	0.3149	0.5747	1.164	0.2706	0.6848	1.978
3	rs1799977	37012077	3	0.2719	0.2884	1	0.1161	0.7333	0.9217	0.2392	0.5768	1.473
3	rs1050450	49357401	2	0.3587	0.3221	4	0.4242	0.5149	1.177	0.2502	0.7207	1.922
3	rs10934853	128319530	1	0.2308	0.2678	4	0.5766	0.4477	0.8204	0.261	0.4919	1.368
3	rs6763931	141383991	1	0.4732	0.4368	3	0.4633	0.4961	1.158	0.2157	0.7588	1.767
4	rs629242	56276871	2	0.1875	0.207	4	0.2025	0.6527	0.8841	0.2738	0.5169	1.512
4	rs12500426	94593458	1	0.5096	0.4558	4	0.9398	0.3323	1.241	0.2227	0.8018	1.92
4	rs17021918	94641726	2	0.2818	0.3307	4	0.9357	0.3334	0.7942	0.2385	0.4977	1.267
4	rs7679673	105140377	1	0.3491	0.3511	4	0.001533	0.9688	0.991	0.2321	0.6288	1.562
5	rs2242652	1279913	2	0.125	0.1579	4	0.7325	0.3921	0.7619	0.3185	0.4081	1.422
5	rs3877899	42801166	1	0.2609	0.2315	3	0.3329	0.5639	1.171	0.2743	0.6843	2.005
5	rs2121875	44365443	3	0.3571	0.3817	2	0.2216	0.6378	0.8998	0.2242	0.5798	1.396
5	rs3733890	79126136	1	0.2727	0.2979	3	0.2602	0.61	0.8839	0.242	0.5501	1.42
6	rs130067	31150734	4	0.1636	0.2447	1	3.192	0.07399	0.604	0.2843	0.346	1.054
6	rs4880	159692840	2	0.4681	0.4832	4	0.0656	0.7979	0.9411	0.237	0.5914	1.498
7	rs12155172	20954872	1	0.2019	0.2139	3	0.06935	0.7923	0.9299	0.276	0.5414	1.597
7	rs10486567	27936944	1	0.2407	0.2473	3	0.01928	0.8896	0.9652	0.2555	0.585	1.592
7	rs6465657	98187015	4	0.4906	0.4808	2	0.03155	0.859	1.04	0.2208	0.6747	1.603
7	rs10244329	128248636	2	0.5833	0.4044	1	4.587	0.03222	2.062	0.3409	1.057	4.022
7	rs3735035	131195959	2	0.5865	0.4667	4	4.639	0.03126	1.621	0.2254	1.042	2.522
8	rs2928679	23438975	2	0.4151	0.4521	4	0.4594	0.4979	0.86	0.2227	0.5558	1.331
8	rs1512268	23668950	1	0.4074	0.4171	3	0.03237	0.8572	0.9607	0.223	0.6206	1.487
8	rs1016343	127081052	2	0.1731	0.2168	4	0.9308	0.3347	0.7563	0.2902	0.4282	1.336
8	rs13254738	127092098	4	0.3077	0.3169	1	0.0321	0.8578	0.9579	0.2403	0.598	1.534
8	rs6983561	127094635	4	0.04464	0.06989	1	0.9155	0.3387	0.6219	0.5007	0.2331	1.659
8	rs1378897	127110414	1	0.03571	0.05376	3	0.595	0.4405	0.6519	0.5587	0.2181	1.948
8	rs16902094	127308101	3	0.213	0.1398	1	3.4	0.0652	1.665	0.2786	0.9646	2.875
8	rs6983267	127401060	2	0.5	0.4259	3	1.895	0.1686	1.348	0.2172	0.8805	2.063
8	rs7000448	127428925	2	0.3269	0.3599	4	0.3851	0.5349	0.8639	0.2358	0.5441	1.372
8	rs6470517	127448159	3	0.1196	0.1568	1	0.7916	0.3736	0.7303	0.3544	0.3646	1.463
8	rs6470494	128087904	2	0.2547	0.3038	4	0.9582	0.3276	0.7834	0.2498	0.4801	1.278
8	rs2294008	142680513	2	0.5	0.4121	4	2.586	0.1078	1.427	0.2215	0.9242	2.202
9	rs11536889	117715853	4	0.08036	0.1676	3	5.206	0.02251	0.4341	0.3744	0.2084	0.9042
10	rs12529	5136651	3	0.4561	0.4223	4	0.4117	0.5211	1.147	0.2144	0.7537	1.747
10	rs10740051	46025670	1	0.3269	0.2692	3	1.33	0.2489	1.318	0.2401	0.8235	2.111
10	rs7920517	46063201	1	0.5094	0.486	3	0.1792	0.6721	1.098	0.2212	0.7118	1.694
10	rs6162	102837224	1	0.4123	0.375	3	0.5167	0.4722	1.169	0.2175	0.7633	1.791
10	rs4962416	125008303	4	0.2818	0.2737	2	0.02828	0.8665	1.041	0.2412	0.6491	1.671
11	rs7127900	2212344	1	0.2037	0.246	3	0.8298	0.3623	0.7841	0.2674	0.4643	1.324
11	rs1001179	34438684	2	0.234	0.2416	4	0.02245	0.8809	0.9591	0.2787	0.5555	1.656
11	rs2727270	61603237	2	0.07143	0.1317	4	3.012	0.08266	0.5071	0.3976	0.2326	1.105
11	rs174448	61872101	4	0.3545	0.375	2	0.1534	0.6953	0.9155	0.2255	0.5885	1.424
11	rs10896438	69139102	3	0.3158	0.3953	2	2.362	0.1243	0.7061	0.227	0.4525	1.102
11	rs11228565	69211113	1	0.1818	0.2513	3	2.285	0.1306	0.662	0.2742	0.3868	1.133
11	rs7931342	69227030	2	0.4907	0.422	3	1.605	0.2052	1.32	0.2192	0.8587	2.028
12	rs3782905	47872384	3	0.3469	0.3082	4	0.5196	0.471	1.193	0.2445	0.7385	1.926
12	rs7299460	48296268	2	0.25	0.314	4	1.545	0.2138	0.7282	0.2558	0.441	1.202
12	rs6823	48362412	3	0.4231	0.4365	4	0.05896	0.8081	0.9468	0.225	0.6092	1.472
12	rs2071358	48366449	1	0.1964	0.1603	4	0.7979	0.3717	1.28	0.277	0.7438	2.203
12	rs10875943	49282227	4	0.2636	0.3032	2	0.6412	0.4233	0.8228	0.2438	0.5103	1.327
12	rs902774	52880120	1	0.1455	0.1526	3	0.03427	0.8531	0.945	0.3058	0.519	1.721
12	rs2279744	68808800	3	0.3585	0.34	2	0.1232	0.7256	1.085	0.2318	0.6886	1.709
12	rs2946834	102394036	2	0.3091	0.2963	4	0.06652	0.7965	1.062	0.2351	0.6703	1.684
12	rs7965399	102497908	4	0.03509	0.04032	2	0.06365	0.8008	0.8655	0.5732	0.2814	2.662
15	rs28665122	101277522	1	0.1304	0.09655	3	0.8553	0.3551	1.404	0.3679	0.6824	2.887
15	rs4965373	101812395	1	0.2128	0.3121	3	3.435	0.06381	0.5958	0.2813	0.3432	1.034
16	rs1529916	8897333	2	0.2596	0.2961	4	0.523	0.4696	0.8336	0.2518	0.5089	1.366
16	rs9939609	53786615	1	0.4464	0.4005	2	0.7488	0.3869	1.207	0.2175	0.788	1.849
17	rs11545302	12899963	3	0.2642	0.3187	1	1.149	0.2838	0.7675	0.2474	0.4726	1.246
17	rs17552022	12994978	4	0.08036	0.1094	2	0.7915	0.3737	0.7115	0.3841	0.3351	1.511
17	rs4054823	13721707	4	0.4643	0.4543	2	0.03459	0.8525	1.041	0.2162	0.6815	1.59
17	rs3094509	37702294	2	0.3214	0.3413	4	0.1523	0.6964	0.9143	0.2296	0.583	1.434
17	rs4794758	37720433	2	0.2105	0.2592	4	1.114	0.2913	0.7623	0.2577	0.46	1.263
17	rs1016990	37728924	3	0.3304	0.3229	4	0.0219	0.8824	1.034	0.2286	0.6608	1.619
17	rs799923	41251931	1	0.1964	0.241	3	0.974	0.3237	0.7697	0.2657	0.4573	1.296
17	rs983085	69212061	3	0.4167	0.4865	1	1.636	0.2009	0.754	0.2212	0.4888	1.163
17	rs1859962	71112612	3	0.5185	0.4701	2	0.7838	0.376	1.214	0.2191	0.7901	1.865
17	rs8066956	80034443	2	0.283	0.1944	4	3.812	0.05089	1.635	0.2534	0.9952	2.687
17	rs6502051	80059332	1	0.3868	0.4054	4	0.1188	0.7303	0.9251	0.2258	0.5943	1.44
17	rs1127678	82101611	1	0.3182	0.254	3	0.6813	0.4091	1.371	0.3829	0.6472	2.904
19	rs713041	1106616	2	0.3723	0.4664	4	2.563	0.1094	0.6786	0.2429	0.4215	1.092
19	rs8102476	38244973	2	0.4196	0.4355	4	0.08804	0.7667	0.9373	0.2182	0.6112	1.437
19	rs887391	41479716	4	0.2727	0.173	2	5.358	0.02063	1.793	0.2544	1.089	2.952
19	rs2659056	50832687	3	0.2232	0.2568	1	0.5173	0.472	0.8318	0.2562	0.5034	1.374
19	rs17632542	50858501	4	0.02632	0.07949	2	3.964	0.04647	0.313	0.6143	0.09389	1.043
19	rs1354774	50889862	4	0.3246	0.3711	2	0.8289	0.3626	0.8142	0.226	0.5229	1.268
19	rs2659122	51363026	3	0.2232	0.2876	1	1.801	0.1796	0.7117	0.2542	0.4324	1.171
19	rs1506684	51371419	2	0.4821	0.427	4	1.06	0.3032	1.249	0.2163	0.8175	1.909
20	rs3918256	44640959	3	0.3304	0.4342	1	3.855	0.04959	0.6428	0.226	0.4128	1.001
20	rs3787268	46013092	1	0.1852	0.2033	3	0.08565	0.7698	0.8907	0.3958	0.41	1.935
20	rs3787557	52783135	4	0.1161	0.1344	2	0.2557	0.6131	0.8457	0.3319	0.4413	1.621
20	rs2762939	54164712	4	0.2232	0.2552	3	0.4759	0.4903	0.8386	0.2553	0.5084	1.383
20	rs2296241	54169680	3	0.5093	0.4785	1	0.3171	0.5733	1.131	0.2187	0.7368	1.736
23	rs5945619	51498820	4	0.4107	0.4624	2	0.4639	0.4958	0.8104	0.3089	0.4424	1.485
23	rs5919432	67801708	4	0.2321	0.2447	2	0.037	0.8475	0.9333	0.3591	0.4617	1.887

## Sheet: NAgg_vs_Control_Adjusted
CHR	SNP	UNADJ	GC	BONF	HOLM	SIDAK_SS	SIDAK_SD	FDR_BH	FDR_BY
2	rs2292884	0.02375	0.05996	1	1	0.9074	0.9074	0.8096	1
15	rs4965373	0.02413	0.06065	1	1	0.9109	0.9087	0.8096	1
9	rs11536889	0.02727	0.06628	1	1	0.9353	0.9316	0.8096	1
7	rs3735035	0.03493	0.07932	1	1	0.9704	0.9671	0.8096	1
10	rs12529	0.05152	0.1053	1	1	0.9947	0.9934	0.8096	1
19	rs2659056	0.07182	0.1342	1	1	0.9994	0.9991	0.8096	1
12	rs2071358	0.0722	0.1347	1	1	0.9994	0.9991	0.8096	1
16	rs9939609	0.07355	0.1366	1	1	0.9995	0.9991	0.8096	1
5	rs2242652	0.07733	0.1417	1	1	0.9997	0.9993	0.8096	1
17	rs8066956	0.0857	0.1528	1	1	0.9999	0.9997	0.8096	1
17	rs1127678	0.09306	0.1624	1	1	0.9999	0.9998	0.8096	1
8	rs16902094	0.1	0.1712	1	1	1	0.9999	0.8096	1
12	rs7299460	0.1074	0.1804	1	1	1	0.9999	0.8096	1
2	rs632148	0.1195	0.1952	1	1	1	1	0.8096	1
4	rs17021918	0.1332	0.2115	1	1	1	1	0.8096	1
3	rs1799977	0.1432	0.2233	1	1	1	1	0.8096	1
8	rs2928679	0.164	0.2469	1	1	1	1	0.8096	1
3	rs17793693	0.1663	0.2495	1	1	1	1	0.8096	1
17	rs17552022	0.1672	0.2505	1	1	1	1	0.8096	1
16	rs1529916	0.1792	0.2638	1	1	1	1	0.8096	1
19	rs713041	0.1843	0.2694	1	1	1	1	0.8096	1
17	rs1859962	0.1885	0.2739	1	1	1	1	0.8096	1
8	rs1016343	0.1939	0.2798	1	1	1	1	0.8096	1
3	rs1050450	0.1963	0.2823	1	1	1	1	0.8096	1
8	rs2294008	0.2101	0.2971	1	1	1	1	0.8149	1
17	rs6502051	0.2214	0.309	1	1	1	1	0.8149	1
2	rs1465618	0.2364	0.3246	1	1	1	1	0.8149	1
3	rs10934853	0.2368	0.3251	1	1	1	1	0.8149	1
10	rs7920517	0.2496	0.3382	1	1	1	1	0.8149	1
8	rs6470494	0.2552	0.3439	1	1	1	1	0.8149	1
20	rs3918256	0.2563	0.3449	1	1	1	1	0.8149	1
3	rs6763931	0.2716	0.3604	1	1	1	1	0.8149	1
12	rs6823	0.2851	0.3738	1	1	1	1	0.8149	1
23	rs5945619	0.2863	0.3751	1	1	1	1	0.8149	1
17	rs4794758	0.2998	0.3883	1	1	1	1	0.8149	1
8	rs1378897	0.3023	0.3908	1	1	1	1	0.8149	1
8	rs7000448	0.3048	0.3933	1	1	1	1	0.8149	1
19	rs1506684	0.3148	0.403	1	1	1	1	0.8149	1
17	rs11545302	0.3517	0.4385	1	1	1	1	0.8149	1
7	rs10244329	0.357	0.4435	1	1	1	1	0.8149	1
10	rs10740051	0.3603	0.4466	1	1	1	1	0.8149	1
1	rs5845	0.3634	0.4496	1	1	1	1	0.8149	1
17	rs983085	0.3674	0.4533	1	1	1	1	0.8149	1
4	rs629242	0.3717	0.4574	1	1	1	1	0.8149	1
7	rs10486567	0.3833	0.4683	1	1	1	1	0.8149	1
11	rs7127900	0.3932	0.4775	1	1	1	1	0.8149	1
17	rs4054823	0.4	0.4838	1	1	1	1	0.8149	1
11	rs7931342	0.4144	0.4972	1	1	1	1	0.8149	1
4	rs12500426	0.4158	0.4984	1	1	1	1	0.8149	1
19	rs8102476	0.417	0.4995	1	1	1	1	0.8149	1
20	rs2296241	0.4362	0.5171	1	1	1	1	0.8149	1
2	rs10187424	0.4409	0.5215	1	1	1	1	0.8149	1
19	rs17632542	0.4413	0.5218	1	1	1	1	0.8149	1
20	rs2762939	0.4445	0.5247	1	1	1	1	0.8149	1
17	rs1016990	0.4891	0.565	1	1	1	1	0.8594	1
5	rs3733890	0.4893	0.5652	1	1	1	1	0.8594	1
7	rs6465657	0.4948	0.5701	1	1	1	1	0.8594	1
11	rs2727270	0.5125	0.5858	1	1	1	1	0.863	1
6	rs130067	0.5143	0.5875	1	1	1	1	0.863	1
5	rs3877899	0.5325	0.6036	1	1	1	1	0.8713	1
12	rs10875943	0.5392	0.6095	1	1	1	1	0.8713	1
17	rs3094509	0.5457	0.6152	1	1	1	1	0.8713	1
10	rs6162	0.5713	0.6377	1	1	1	1	0.8743	1
6	rs4880	0.5768	0.6424	1	1	1	1	0.8743	1
23	rs5919432	0.5819	0.6469	1	1	1	1	0.8743	1
10	rs4962416	0.5902	0.6542	1	1	1	1	0.8743	1
8	rs6470517	0.6076	0.6692	1	1	1	1	0.8743	1
19	rs887391	0.6151	0.6757	1	1	1	1	0.8743	1
2	rs2710647	0.6184	0.6786	1	1	1	1	0.8743	1
2	rs1056827	0.6239	0.6834	1	1	1	1	0.8743	1
1	rs1380576	0.6271	0.6861	1	1	1	1	0.8743	1
2	rs12621278	0.6507	0.7064	1	1	1	1	0.8947	1
11	rs1001179	0.6944	0.7438	1	1	1	1	0.9418	1
19	rs1354774	0.7233	0.7684	1	1	1	1	0.9507	1
8	rs6983267	0.7268	0.7713	1	1	1	1	0.9507	1
12	rs902774	0.7298	0.7739	1	1	1	1	0.9507	1
8	rs6983561	0.7525	0.793	1	1	1	1	0.9578	1
7	rs12155172	0.772	0.8095	1	1	1	1	0.9578	1
8	rs13254738	0.7778	0.8144	1	1	1	1	0.9578	1
8	rs1512268	0.7924	0.8266	1	1	1	1	0.9578	1
2	rs721048	0.7942	0.8282	1	1	1	1	0.9578	1
11	rs10896438	0.7954	0.8292	1	1	1	1	0.9578	1
12	rs7965399	0.8214	0.851	1	1	1	1	0.9578	1
12	rs3782905	0.8354	0.8628	1	1	1	1	0.9578	1
11	rs11228565	0.8445	0.8704	1	1	1	1	0.9578	1
12	rs2279744	0.8582	0.8818	1	1	1	1	0.9578	1
19	rs2659122	0.8615	0.8846	1	1	1	1	0.9578	1
1	rs12042763	0.8856	0.9047	1	1	1	1	0.9578	1
20	rs3787557	0.8875	0.9063	1	1	1	1	0.9578	1
15	rs28665122	0.9051	0.921	1	1	1	1	0.9578	1
11	rs174448	0.9081	0.9235	1	1	1	1	0.9578	1
17	rs799923	0.9095	0.9246	1	1	1	1	0.9578	1
3	rs4135275	0.9236	0.9364	1	1	1	1	0.9625	1
20	rs3787268	0.9351	0.946	1	1	1	1	0.9643	1
5	rs2121875	0.9477	0.9565	1	1	1	1	0.9657	1
4	rs7679673	0.9559	0.9633	1	1	1	1	0.9657	1
12	rs2946834	0.9731	0.9776	1	1	1	1	0.9731	1

## Sheet: NAgg_vs_Control_OR
CHR	SNP	BP	A1	F_A	F_U	A2	CHISQ	P	OR	SE	L95	U95
1	rs5845	86863156	2	0.2042	0.2447	4	0.826	0.3634	0.7919	0.2571	0.4784	1.311
1	rs12042763	186682744	2	0.2567	0.25	3	0.0207	0.8856	1.036	0.245	0.6409	1.674
1	rs1380576	204519150	4	0.3077	0.3478	3	0.2361	0.6271	0.8333	0.3755	0.3992	1.739
2	rs632148	31580962	4	0.3137	0.3936	3	2.424	0.1195	0.7042	0.226	0.4522	1.097
2	rs1056827	38075034	2	0.2404	0.1875	3	0.2404	0.6239	1.372	0.6473	0.3858	4.878
2	rs1465618	43326810	1	0.1961	0.2455	3	1.402	0.2364	0.7498	0.2438	0.4649	1.209
2	rs721048	62904596	1	0.1947	0.1842	3	0.06802	0.7942	1.071	0.2625	0.6402	1.791
2	rs2710647	63213970	2	0.4388	0.4643	4	0.2481	0.6184	0.9021	0.2069	0.6014	1.353
2	rs10187424	85567174	4	0.43	0.3909	2	0.5938	0.4409	1.176	0.2101	0.7788	1.774
2	rs12621278	172446825	3	0.0625	0.04545	1	0.2051	0.6507	1.4	0.7464	0.3242	6.046
2	rs2292884	238443226	3	0.2905	0.1875	1	5.113	0.02375	1.774	0.2562	1.074	2.931
3	rs17793693	12345971	1	0.08741	0.04444	4	1.916	0.1663	2.059	0.5325	0.7252	5.848
3	rs4135275	12443844	3	0.2128	0.217	1	0.009192	0.9236	0.9757	0.2561	0.5906	1.612
3	rs1799977	37012077	3	0.3425	0.2719	1	2.143	0.1432	1.394	0.2278	0.8922	2.179
3	rs1050450	49357401	2	0.2932	0.3587	4	1.67	0.1963	0.7415	0.2321	0.4705	1.169
3	rs10934853	128319530	1	0.2872	0.2308	4	1.399	0.2368	1.343	0.2498	0.8229	2.191
3	rs6763931	141383991	1	0.4179	0.4732	3	1.208	0.2716	0.7991	0.2043	0.5354	1.193
4	rs629242	56276871	2	0.2256	0.1875	4	0.7979	0.3717	1.262	0.2612	0.7565	2.106
4	rs12500426	94593458	1	0.4664	0.5096	4	0.6621	0.4158	0.8412	0.2126	0.5545	1.276
4	rs17021918	94641726	2	0.3557	0.2818	4	2.255	0.1332	1.407	0.2282	0.8997	2.201
4	rs7679673	105140377	1	0.3463	0.3491	4	0.003052	0.9559	0.9878	0.2213	0.6402	1.524
5	rs2242652	1279913	2	0.1948	0.125	4	3.12	0.07733	1.694	0.3013	0.9385	3.057
5	rs3877899	42801166	1	0.2316	0.2609	3	0.3895	0.5325	0.854	0.253	0.5201	1.402
5	rs2121875	44365443	3	0.3604	0.3571	2	0.004308	0.9477	1.014	0.2131	0.6679	1.54
5	rs3733890	79126136	1	0.3056	0.2727	3	0.478	0.4893	1.173	0.2314	0.7455	1.847
6	rs130067	31150734	4	0.1898	0.1636	1	0.4252	0.5143	1.197	0.2761	0.6968	2.056
6	rs4880	159692840	2	0.4986	0.4681	4	0.3115	0.5768	1.13	0.2194	0.7352	1.738
7	rs12155172	20954872	1	0.2145	0.2019	3	0.08393	0.772	1.079	0.264	0.6434	1.811
7	rs10486567	27936944	1	0.2042	0.2407	3	0.7601	0.3833	0.8091	0.2433	0.5022	1.304
7	rs6465657	98187015	4	0.4547	0.4906	2	0.4661	0.4948	0.8659	0.211	0.5726	1.309
7	rs10244329	128248636	1	0.4862	0.4167	2	0.8484	0.357	1.325	0.306	0.7272	2.413
7	rs3735035	131195959	2	0.4743	0.5865	4	4.449	0.03493	0.636	0.2157	0.4168	0.9707
8	rs2928679	23438975	2	0.4883	0.4151	4	1.937	0.164	1.345	0.2134	0.8852	2.043
8	rs1512268	23668950	1	0.3939	0.4074	3	0.0693	0.7924	0.9455	0.2131	0.6227	1.436
8	rs1016343	127081052	2	0.2306	0.1731	4	1.688	0.1939	1.432	0.2777	0.8311	2.468
8	rs13254738	127092098	4	0.3217	0.3077	1	0.0796	0.7778	1.067	0.2297	0.6801	1.674
8	rs6983561	127094635	4	0.03833	0.04464	1	0.09946	0.7525	0.853	0.5045	0.3173	2.293
8	rs1378897	127110414	1	0.0602	0.03571	3	1.064	0.3023	1.73	0.5374	0.6032	4.959
8	rs16902094	127308101	3	0.15	0.213	1	2.705	0.1	0.6522	0.2614	0.3907	1.089
8	rs6983267	127401060	2	0.4819	0.5	3	0.1221	0.7268	0.9302	0.2072	0.6197	1.396
8	rs7000448	127428925	2	0.3797	0.3269	4	1.053	0.3048	1.26	0.2256	0.8098	1.961
8	rs6470517	127448159	3	0.1394	0.1196	1	0.2637	0.6076	1.192	0.3432	0.6086	2.337
8	rs6470494	128087904	2	0.3098	0.2547	4	1.294	0.2552	1.313	0.2399	0.8205	2.102
8	rs2294008	142680513	2	0.4343	0.5	4	1.57	0.2101	0.7679	0.2112	0.5076	1.161
9	rs11536889	117715853	4	0.1611	0.08036	3	4.873	0.02727	2.198	0.3648	1.075	4.494
10	rs12529	5136651	3	0.3609	0.4561	4	3.791	0.05152	0.6732	0.2041	0.4513	1.004
10	rs10740051	46025670	1	0.2828	0.3269	3	0.8368	0.3603	0.8119	0.228	0.5193	1.269
10	rs7920517	46063201	3	0.4303	0.4906	1	1.325	0.2496	0.7843	0.2114	0.5182	1.187
10	rs6162	102837224	1	0.3844	0.4123	3	0.3205	0.5713	0.8901	0.2057	0.5948	1.332
10	rs4962416	125008303	4	0.2576	0.2818	2	0.29	0.5902	0.8843	0.2284	0.5652	1.384
11	rs7127900	2212344	1	0.2416	0.2037	3	0.7291	0.3932	1.245	0.2574	0.752	2.062
11	rs1001179	34438684	2	0.2163	0.234	4	0.1543	0.6944	0.903	0.2598	0.5427	1.502
11	rs2727270	61603237	2	0.09046	0.07143	4	0.4291	0.5125	1.293	0.3932	0.5983	2.794
11	rs174448	61872101	4	0.3602	0.3545	2	0.01333	0.9081	1.025	0.2144	0.6733	1.561
11	rs10896438	69139102	3	0.3037	0.3158	2	0.06724	0.7954	0.9451	0.2177	0.6169	1.448
11	rs11228565	69211113	1	0.1898	0.1818	3	0.03847	0.8445	1.054	0.268	0.6233	1.782
11	rs7931342	69227030	3	0.4667	0.5093	2	0.6661	0.4144	0.8432	0.2092	0.5596	1.27
12	rs3782905	47872384	3	0.3362	0.3469	4	0.04317	0.8354	0.9534	0.2297	0.6078	1.496
12	rs7299460	48296268	2	0.3299	0.25	4	2.592	0.1074	1.477	0.2432	0.9168	2.378
12	rs6823	48362412	3	0.4798	0.4231	4	1.143	0.2851	1.258	0.2148	0.8256	1.916
12	rs2071358	48366449	1	0.1318	0.1964	4	3.232	0.0722	0.6208	0.2671	0.3678	1.048
12	rs10875943	49282227	4	0.2923	0.2636	2	0.377	0.5392	1.154	0.2329	0.7308	1.821
12	rs902774	52880120	1	0.1332	0.1455	3	0.1193	0.7298	0.903	0.2956	0.5059	1.612
12	rs2279744	68808800	3	0.3495	0.3585	2	0.03192	0.8582	0.9614	0.2205	0.624	1.481
12	rs2946834	102394036	2	0.3107	0.3091	4	0.001139	0.9731	1.008	0.2221	0.652	1.557
12	rs7965399	102497908	4	0.03951	0.03509	2	0.05096	0.8214	1.131	0.5469	0.3873	3.305
15	rs28665122	101277522	1	0.1349	0.1304	3	0.01421	0.9051	1.04	0.3286	0.5461	1.98
15	rs4965373	101812395	1	0.3274	0.2128	3	5.085	0.02413	1.801	0.264	1.074	3.022
16	rs1529916	8897333	2	0.326	0.2596	4	1.804	0.1792	1.379	0.2402	0.8614	2.209
16	rs9939609	53786615	1	0.3574	0.4464	2	3.202	0.07355	0.6896	0.2084	0.4584	1.038
17	rs11545302	12899963	3	0.3107	0.2642	1	0.8672	0.3517	1.256	0.2447	0.7772	2.028
17	rs17552022	12994978	4	0.1261	0.08036	2	1.908	0.1672	1.652	0.3667	0.8051	3.389
17	rs4054823	13721707	4	0.4214	0.4643	2	0.7084	0.4	0.8404	0.2068	0.5604	1.26
17	rs3094509	37702294	2	0.3507	0.3214	4	0.3652	0.5457	1.14	0.2175	0.7446	1.747
17	rs4794758	37720433	2	0.256	0.2105	4	1.075	0.2998	1.29	0.2462	0.7963	2.091
17	rs1016990	37728924	3	0.3642	0.3304	4	0.4784	0.4891	1.161	0.2159	0.7604	1.772
17	rs799923	41251931	1	0.1919	0.1964	3	0.01293	0.9095	0.9712	0.2568	0.5871	1.607
17	rs983085	69212061	3	0.4636	0.4167	1	0.8126	0.3674	1.21	0.2115	0.7992	1.832
17	rs1859962	71112612	3	0.45	0.5185	2	1.73	0.1885	0.7597	0.2093	0.5041	1.145
17	rs8066956	80034443	2	0.2081	0.283	4	2.953	0.0857	0.6655	0.2381	0.4174	1.061
17	rs6502051	80059332	1	0.4508	0.3868	4	1.495	0.2214	1.302	0.2159	0.8525	1.987
17	rs1127678	82101611	1	0.2093	0.3182	3	2.821	0.09306	0.5672	0.3413	0.2906	1.107
19	rs713041	1106616	2	0.4444	0.3723	4	1.763	0.1843	1.349	0.2259	0.8662	2.1
19	rs8102476	38244973	2	0.4613	0.4196	4	0.6589	0.417	1.184	0.2084	0.7871	1.782
19	rs887391	41479716	4	0.25	0.2727	2	0.2529	0.6151	0.8889	0.2343	0.5616	1.407
19	rs2659056	50832687	3	0.3077	0.2232	1	3.241	0.07182	1.547	0.2436	0.9595	2.493
19	rs17632542	50858501	4	0.04143	0.02632	2	0.5929	0.4413	1.599	0.6151	0.479	5.339
19	rs1354774	50889862	4	0.3415	0.3246	2	0.1253	0.7233	1.079	0.2155	0.7075	1.646
19	rs2659122	51363026	3	0.2308	0.2232	1	0.03044	0.8615	1.044	0.2468	0.6436	1.693
19	rs1506684	51371419	2	0.4307	0.4821	4	1.01	0.3148	0.8127	0.2065	0.5422	1.218
20	rs3918256	44640959	3	0.3866	0.3304	1	1.289	0.2563	1.277	0.216	0.8365	1.951
20	rs3787268	46013092	1	0.1897	0.1852	3	0.006629	0.9351	1.03	0.3649	0.5038	2.106
20	rs3787557	52783135	4	0.1208	0.1161	2	0.02	0.8875	1.046	0.3207	0.5581	1.962
20	rs2762939	54164712	4	0.2573	0.2232	3	0.5847	0.4445	1.206	0.245	0.746	1.949
20	rs2296241	54169680	3	0.4686	0.5093	1	0.6063	0.4362	0.8499	0.209	0.5643	1.28
23	rs5945619	51498820	4	0.3367	0.4107	2	1.137	0.2863	0.7283	0.2981	0.4061	1.306
23	rs5919432	67801708	4	0.2	0.2321	2	0.3031	0.5819	0.8269	0.3456	0.4201	1.628
