# Supplementary material for: Environmental factors and risk of aggressive prostate cancer among a population of New Zealand men – a genotypic approach
Source: Royal Society of Chemistry journal article supplement (doi:10.1039/c6mb00873a), 2017-02-21
Supplement: c6mb00873a2.xlsx [file c6mb00873a2.xlsx]

## Sheet: Agg_vs_Control_Adjusted
CHR	SNP	UNADJ	GC	BONF	HOLM	SIDAK_SS	SIDAK_SD	FDR_BH	FDR_BY
11	rs10896438	0.0004214	0.0004214	0.04172	0.04172	0.04087	0.04087	0.02096	0.1085
11	rs7931342	0.0004234	0.0004234	0.04191	0.04172	0.04106	0.04087	0.02096	0.1085
10	rs7920517	0.001734	0.001734	0.1717	0.1682	0.1579	0.1549	0.05723	0.2963
1	rs5845	0.01333	0.01333	1	1	0.7352	0.7244	0.3001	1
19	rs2659122	0.01516	0.01516	1	1	0.7795	0.7656	0.3001	1
3	rs1799977	0.0202	0.0202	1	1	0.8674	0.8532	0.3334	1
7	rs10244329	0.03245	0.03245	1	1	0.9618	0.9535	0.4589	1
10	rs12529	0.04006	0.04006	1	1	0.9825	0.9768	0.4894	1
19	rs887391	0.04449	0.04449	1	1	0.9889	0.9841	0.4894	1
11	rs2727270	0.05077	0.05077	1	1	0.9942	0.9908	0.5026	1
4	rs629242	0.05717	0.05717	1	1	0.9971	0.9947	0.5145	1
11	rs11228565	0.06476	0.06476	1	1	0.9987	0.9972	0.5343	1
17	rs799923	0.07569	0.07569	1	1	0.9996	0.9989	0.5656	1
2	rs632148	0.08652	0.08652	1	1	0.9999	0.9996	0.5656	1
19	rs2659056	0.0973	0.0973	1	1	1	0.9998	0.5656	1
20	rs3918256	0.09868	0.09868	1	1	1	0.9998	0.5656	1
3	rs4135275	0.1002	0.1002	1	1	1	0.9998	0.5656	1
6	rs130067	0.1028	0.1028	1	1	1	0.9999	0.5656	1
17	rs4054823	0.1172	0.1172	1	1	1	1	0.6098	1
1	rs1380576	0.1247	0.1247	1	1	1	1	0.6098	1
17	rs6502051	0.1294	0.1294	1	1	1	1	0.6098	1
11	rs1001179	0.1363	0.1363	1	1	1	1	0.6135	1
12	rs6823	0.1577	0.1577	1	1	1	1	0.6786	1
16	rs1529916	0.174	0.174	1	1	1	1	0.7177	1
3	rs1050450	0.1844	0.1844	1	1	1	1	0.73	1
2	rs721048	0.2102	0.2102	1	1	1	1	0.795	1
3	rs10934853	0.2168	0.2168	1	1	1	1	0.795	1
16	rs9939609	0.25	0.25	1	1	1	1	0.8409	1
10	rs10740051	0.2568	0.2568	1	1	1	1	0.8409	1
12	rs7299460	0.2593	0.2593	1	1	1	1	0.8409	1
19	rs8102476	0.2702	0.2702	1	1	1	1	0.8409	1
10	rs6162	0.2787	0.2787	1	1	1	1	0.8409	1
8	rs16902094	0.2865	0.2865	1	1	1	1	0.8409	1
8	rs6983267	0.2902	0.2902	1	1	1	1	0.8409	1
17	rs4794758	0.3069	0.3069	1	1	1	1	0.8409	1
19	rs1354774	0.3084	0.3084	1	1	1	1	0.8409	1
5	rs2242652	0.3143	0.3143	1	1	1	1	0.8409	1
17	rs1016990	0.3445	0.3445	1	1	1	1	0.8752	1
20	rs3787268	0.3573	0.3573	1	1	1	1	0.8752	1
7	rs10486567	0.3582	0.3582	1	1	1	1	0.8752	1
8	rs6470517	0.3625	0.3625	1	1	1	1	0.8752	1
2	rs10187424	0.3903	0.3903	1	1	1	1	0.9201	1
6	rs4880	0.4309	0.4309	1	1	1	1	0.9858	1
12	rs2946834	0.4381	0.4381	1	1	1	1	0.9858	1
8	rs1016343	0.4517	0.4517	1	1	1	1	0.9864	1
7	rs12155172	0.4783	0.4783	1	1	1	1	0.9864	1
12	rs2071358	0.481	0.481	1	1	1	1	0.9864	1
1	rs12042763	0.4914	0.4914	1	1	1	1	0.9864	1
20	rs2762939	0.534	0.534	1	1	1	1	0.9864	1
4	rs17021918	0.5342	0.5342	1	1	1	1	0.9864	1
8	rs13254738	0.5463	0.5463	1	1	1	1	0.9864	1
8	rs2928679	0.5485	0.5485	1	1	1	1	0.9864	1
3	rs6763931	0.5494	0.5494	1	1	1	1	0.9864	1
17	rs1127678	0.5562	0.5562	1	1	1	1	0.9864	1
19	rs1506684	0.5574	0.5574	1	1	1	1	0.9864	1
12	rs902774	0.5652	0.5652	1	1	1	1	0.9864	1
19	rs17632542	0.5679	0.5679	1	1	1	1	0.9864	1
8	rs1512268	0.5802	0.5802	1	1	1	1	0.9904	1
17	rs1859962	0.6204	0.6204	1	1	1	1	1	1
8	rs7000448	0.6388	0.6388	1	1	1	1	1	1
2	rs2710647	0.6509	0.6509	1	1	1	1	1	1
5	rs3877899	0.6761	0.6761	1	1	1	1	1	1
17	rs983085	0.6909	0.6909	1	1	1	1	1	1
7	rs6465657	0.7211	0.7211	1	1	1	1	1	1
12	rs3782905	0.7259	0.7259	1	1	1	1	1	1
19	rs713041	0.7368	0.7368	1	1	1	1	1	1
5	rs3733890	0.7412	0.7412	1	1	1	1	1	1
11	rs7127900	0.7692	0.7692	1	1	1	1	1	1
2	rs1465618	0.7893	0.7893	1	1	1	1	1	1
17	rs8066956	0.8155	0.8155	1	1	1	1	1	1
17	rs3094509	0.8169	0.8169	1	1	1	1	1	1
12	rs2279744	0.8353	0.8353	1	1	1	1	1	1
10	rs4962416	0.8384	0.8384	1	1	1	1	1	1
5	rs2121875	0.8418	0.8418	1	1	1	1	1	1
17	rs11545302	0.8668	0.8668	1	1	1	1	1	1
20	rs3787557	0.8873	0.8873	1	1	1	1	1	1
4	rs7679673	0.8934	0.8934	1	1	1	1	1	1
11	rs174448	0.8945	0.8945	1	1	1	1	1	1
8	rs2294008	0.8986	0.8986	1	1	1	1	1	1
20	rs2296241	0.9173	0.9173	1	1	1	1	1	1
8	rs6470494	0.9201	0.9201	1	1	1	1	1	1
7	rs3735035	0.939	0.939	1	1	1	1	1	1
15	rs4965373	0.9472	0.9472	1	1	1	1	1	1
2	rs2292884	0.9509	0.9509	1	1	1	1	1	1
9	rs11536889	0.9623	0.9623	1	1	1	1	1	1
4	rs12500426	0.9697	0.9697	1	1	1	1	1	1
17	rs17552022	0.9788	0.9788	1	1	1	1	1	1
2	rs1056827	0.9862	0.9862	1	1	1	1	1	1
12	rs10875943	0.9888	0.9888	1	1	1	1	1	1
15	rs28665122	0.9914	0.9914	1	1	1	1	1	1
8	rs6983561	0.9992	0.9992	1	1	1	1	1	1
3	rs17793693	0.9993	0.9993	1	1	1	1	1	1
2	rs12621278	1	1	1	1	1	1	1	1
8	rs1378897	1	1	1	1	1	1	1	1
12	rs7965399	1	1	1	1	1	1	1	1
23	rs5945619	1	1	1	1	1	1	1	1
23	rs5919432	1	1	1	1	1	1	1	1

## Sheet: Agg_vs_Control_OR
CHR	SNP	BP	A1	TEST	NMISS	OR	SE	L95	U95	STAT	P
1	rs5845	86863156	2	ADD	507	0.5418	0.2476	0.3335	0.8803	-2.475	0.01333
1	rs5845	86863156	2	DOMDEV	507	1.577	0.3031	0.8707	2.857	1.503	0.1328
1	rs5845	86863156	2	C2	507	0.5408	0.2492	0.3318	0.8812	-2.467	0.01361				C2 - BMI
1	rs5845	86863156	2	C3	507	0.4908	0.2136	0.3229	0.7459	-3.332	0.000861				C3 - Smoke
1	rs5845	86863156	2	C4	507	4.646	0.2321	2.948	7.321	6.618	3.629e-011				C4 - Alcohol
1	rs5845	86863156	2	GENO_2DF	507	NA	NA	NA	NA	6.191	0.04526
1	rs12042763	186682744	2	ADD	481	1.173	0.2319	0.7446	1.848	0.6881	0.4914
1	rs12042763	186682744	2	DOMDEV	481	1.176	0.2856	0.6719	2.058	0.5678	0.5702
1	rs12042763	186682744	2	C2	481	0.5739	0.241	0.3578	0.9204	-2.304	0.02123
1	rs12042763	186682744	2	C3	481	0.5064	0.2058	0.3384	0.7581	-3.306	0.0009462
1	rs12042763	186682744	2	C4	481	5.461	0.244	3.385	8.809	6.957	3.477e-012
1	rs12042763	186682744	2	GENO_2DF	481	NA	NA	NA	NA	2.393	0.3022
1	rs1380576	204519150	4	ADD	115	0.5801	0.3547	0.2894	1.163	-1.535	0.1247
1	rs1380576	204519150	4	DOMDEV	115	1.482	0.4714	0.5884	3.733	0.8347	0.4039
1	rs1380576	204519150	4	C2	115	0.4729	0.475	0.1864	1.2	-1.577	0.1149
1	rs1380576	204519150	4	C3	115	0.5419	0.4449	0.2266	1.296	-1.377	0.1685
1	rs1380576	204519150	4	C4	115	2.048e+009	5828	0	inf	0.003679	0.9971
1	rs1380576	204519150	4	GENO_2DF	115	NA	NA	NA	NA	2.39	0.3027
2	rs632148	31580962	4	ADD	506	1.477	0.2275	0.9456	2.306	1.714	0.08652
2	rs632148	31580962	4	DOMDEV	506	0.7371	0.2778	0.4276	1.271	-1.098	0.2723
2	rs632148	31580962	4	C2	506	0.5871	0.2437	0.3641	0.9465	-2.185	0.02886
2	rs632148	31580962	4	C3	506	0.5381	0.2089	0.3573	0.8104	-2.966	0.003018
2	rs632148	31580962	4	C4	506	4.082	0.2285	2.609	6.388	6.157	7.408e-010
2	rs632148	31580962	4	GENO_2DF	506	NA	NA	NA	NA	2.938	0.2301
2	rs1056827	38075034	2	ADD	336	0.9907	0.5396	0.3441	2.853	-0.01728	0.9862
2	rs1056827	38075034	2	DOMDEV	336	1.033	0.6613	0.2827	3.777	0.04948	0.9605
2	rs1056827	38075034	2	C2	336	1.356	0.4796	0.5297	3.472	0.635	0.5254
2	rs1056827	38075034	2	C3	336	0.7901	0.4549	0.3239	1.927	-0.5179	0.6045
2	rs1056827	38075034	2	C4	336	5.657	0.5208	2.038	15.7	3.327	0.0008772
2	rs1056827	38075034	2	GENO_2DF	336	NA	NA	NA	NA	0.003046	0.9985
2	rs1465618	43326810	1	ADD	494	1.074	0.2674	0.6359	1.814	0.2672	0.7893
2	rs1465618	43326810	1	DOMDEV	494	1.058	0.3218	0.5633	1.988	0.1763	0.8601
2	rs1465618	43326810	1	C2	494	0.5082	0.2402	0.3174	0.8138	-2.818	0.004838
2	rs1465618	43326810	1	C3	494	0.5379	0.2022	0.3619	0.7995	-3.067	0.002165
2	rs1465618	43326810	1	C4	494	5.424	0.2409	3.382	8.697	7.018	2.25e-012
2	rs1465618	43326810	1	GENO_2DF	494	NA	NA	NA	NA	0.3762	0.8285
2	rs721048	62904596	1	ADD	496	0.7302	0.2509	0.4466	1.194	-1.253	0.2102
2	rs721048	62904596	1	DOMDEV	496	1.321	0.3063	0.7248	2.408	0.9092	0.3633
2	rs721048	62904596	1	C2	496	0.5523	0.2365	0.3474	0.8781	-2.51	0.01209
2	rs721048	62904596	1	C3	496	0.5252	0.2009	0.3543	0.7786	-3.206	0.001346
2	rs721048	62904596	1	C4	496	5.256	0.2402	3.282	8.416	6.907	4.942e-012
2	rs721048	62904596	1	GENO_2DF	496	NA	NA	NA	NA	1.57	0.4561
2	rs2710647	63213970	2	ADD	479	1.071	0.1506	0.7969	1.438	0.4524	0.6509
2	rs2710647	63213970	2	DOMDEV	479	0.9737	0.2068	0.6492	1.46	-0.1288	0.8975
2	rs2710647	63213970	2	C2	479	0.5232	0.2381	0.3281	0.8342	-2.721	0.006504
2	rs2710647	63213970	2	C3	479	0.5395	0.2034	0.3621	0.8037	-3.034	0.002412
2	rs2710647	63213970	2	C4	479	5.007	0.2439	3.104	8.075	6.605	3.965e-011
2	rs2710647	63213970	2	GENO_2DF	479	NA	NA	NA	NA	0.2064	0.902
2	rs10187424	85567174	4	ADD	530	1.138	0.15	0.8478	1.526	0.859	0.3903
2	rs10187424	85567174	4	DOMDEV	530	0.909	0.2023	0.6115	1.351	-0.4714	0.6373
2	rs10187424	85567174	4	C2	530	0.4694	0.2332	0.2972	0.7414	-3.244	0.001181
2	rs10187424	85567174	4	C3	530	0.5116	0.1964	0.3481	0.7519	-3.412	0.0006456
2	rs10187424	85567174	4	C4	530	4.149	0.2206	2.692	6.394	6.449	1.124e-010
2	rs10187424	85567174	4	GENO_2DF	530	NA	NA	NA	NA	0.8048	0.6687
2	rs12621278	172446825	3	ADD	319	0.8756	1.256e+004	0	inf	-1.058e-005	1
2	rs12621278	172446825	3	DOMDEV	319	0.7979	1.256e+004	0	inf	-1.798e-005	1
2	rs12621278	172446825	3	C2	319	0.5126	0.3815	0.2427	1.083	-1.752	0.07981
2	rs12621278	172446825	3	C3	319	0.7482	0.3245	0.3961	1.413	-0.894	0.3713
2	rs12621278	172446825	3	C4	319	9.989e+009	6031	0	inf	0.003818	0.997
2	rs12621278	172446825	3	GENO_2DF	319	NA	NA	NA	NA	0.6728	0.7143
2	rs2292884	238443226	3	ADD	535	1.012	0.1946	0.6911	1.482	0.06157	0.9509
2	rs2292884	238443226	3	DOMDEV	535	0.9213	0.2436	0.5716	1.485	-0.3367	0.7364
2	rs2292884	238443226	3	C2	535	0.4818	0.2324	0.3056	0.7598	-3.142	0.001677
2	rs2292884	238443226	3	C3	535	0.5494	0.1936	0.3759	0.8028	-3.095	0.00197
2	rs2292884	238443226	3	C4	535	3.961	0.2183	2.583	6.076	6.307	2.845e-010
2	rs2292884	238443226	3	GENO_2DF	535	NA	NA	NA	NA	0.144	0.9305
3	rs17793693	12345971	1	ADD	431	2.284e+004	1.219e+004	0	inf	0.0008234	0.9993
3	rs17793693	12345971	1	DOMDEV	431	0.0001447	1.219e+004	0	inf	-0.0007253	0.9994
3	rs17793693	12345971	1	C2	431	0.6869	0.256	0.4159	1.135	-1.467	0.1425
3	rs17793693	12345971	1	C3	431	0.5304	0.2237	0.3421	0.8224	-2.834	0.004596
3	rs17793693	12345971	1	C4	431	5.476	0.2745	3.197	9.378	6.194	5.879e-010
3	rs17793693	12345971	1	GENO_2DF	431	NA	NA	NA	NA	6.866	0.03229
3	rs4135275	12443844	3	ADD	478	1.592	0.283	0.9145	2.773	1.644	0.1002
3	rs4135275	12443844	3	DOMDEV	478	0.59	0.3347	0.3062	1.137	-1.576	0.115
3	rs4135275	12443844	3	C2	478	0.5497	0.2391	0.344	0.8784	-2.502	0.01234
3	rs4135275	12443844	3	C3	478	0.5551	0.2037	0.3724	0.8273	-2.891	0.003845
3	rs4135275	12443844	3	C4	478	5.052	0.2468	3.114	8.195	6.562	5.312e-011
3	rs4135275	12443844	3	GENO_2DF	478	NA	NA	NA	NA	2.95	0.2287
3	rs1799977	37012077	3	ADD	481	1.53	0.1832	1.069	2.191	2.323	0.0202
3	rs1799977	37012077	3	DOMDEV	481	1.002	0.2447	0.6202	1.618	0.007602	0.9939
3	rs1799977	37012077	3	C2	481	0.419	0.2455	0.259	0.6781	-3.542	0.0003967
3	rs1799977	37012077	3	C3	481	0.4688	0.2102	0.3105	0.7079	-3.603	0.0003142
3	rs1799977	37012077	3	C4	481	7.436	0.2657	4.417	12.52	7.55	4.354e-014
3	rs1799977	37012077	3	GENO_2DF	481	NA	NA	NA	NA	7.082	0.02899
3	rs1050450	49357401	2	ADD	514	0.7817	0.1856	0.5434	1.125	-1.327	0.1844
3	rs1050450	49357401	2	DOMDEV	514	1.185	0.2449	0.7332	1.915	0.6928	0.4884
3	rs1050450	49357401	2	C2	514	0.5848	0.2423	0.3637	0.9404	-2.214	0.02685
3	rs1050450	49357401	2	C3	514	0.5226	0.2091	0.3469	0.7874	-3.103	0.001915
3	rs1050450	49357401	2	C4	514	4.156	0.2267	2.665	6.482	6.283	3.317e-010
3	rs1050450	49357401	2	GENO_2DF	514	NA	NA	NA	NA	1.762	0.4143
3	rs10934853	128319530	1	ADD	479	1.29	0.2064	0.861	1.934	1.235	0.2168
3	rs10934853	128319530	1	DOMDEV	479	0.8165	0.2618	0.4887	1.364	-0.7744	0.4387
3	rs10934853	128319530	1	C2	479	0.5472	0.2397	0.342	0.8754	-2.515	0.0119
3	rs10934853	128319530	1	C3	479	0.5724	0.2041	0.3837	0.8539	-2.734	0.006264
3	rs10934853	128319530	1	C4	479	5.349	0.2468	3.298	8.677	6.794	1.088e-011
3	rs10934853	128319530	1	GENO_2DF	479	NA	NA	NA	NA	1.526	0.4662
3	rs6763931	141383991	1	ADD	537	0.9205	0.1383	0.7019	1.207	-0.5986	0.5494
3	rs6763931	141383991	1	DOMDEV	537	1.406	0.1976	0.9545	2.071	1.725	0.0846
3	rs6763931	141383991	1	C2	537	0.4973	0.2321	0.3156	0.7839	-3.009	0.00262
3	rs6763931	141383991	1	C3	537	0.5257	0.1942	0.3593	0.7692	-3.312	0.0009277
3	rs6763931	141383991	1	C4	537	4.099	0.2199	2.664	6.308	6.414	1.415e-010
3	rs6763931	141383991	1	GENO_2DF	537	NA	NA	NA	NA	3.059	0.2166
4	rs629242	56276871	2	ADD	483	1.68	0.2729	0.9843	2.869	1.902	0.05717
4	rs629242	56276871	2	DOMDEV	483	0.5582	0.3228	0.2965	1.051	-1.806	0.07088
4	rs629242	56276871	2	C2	483	0.5049	0.2397	0.3156	0.8076	-2.852	0.00435
4	rs629242	56276871	2	C3	483	0.5487	0.2033	0.3684	0.8173	-2.953	0.003152
4	rs629242	56276871	2	C4	483	5.285	0.247	3.256	8.576	6.739	1.596e-011
4	rs629242	56276871	2	GENO_2DF	483	NA	NA	NA	NA	3.941	0.1394
4	rs12500426	94593458	1	ADD	479	1.005	0.1411	0.7625	1.326	0.038	0.9697
4	rs12500426	94593458	1	DOMDEV	479	1.271	0.2054	0.85	1.901	1.168	0.2426
4	rs12500426	94593458	1	C2	479	0.54	0.2402	0.3372	0.8647	-2.565	0.01031
4	rs12500426	94593458	1	C3	479	0.5581	0.2045	0.3738	0.8332	-2.852	0.004342
4	rs12500426	94593458	1	C4	479	4.96	0.245	3.068	8.017	6.535	6.35e-011
4	rs12500426	94593458	1	GENO_2DF	479	NA	NA	NA	NA	1.391	0.4989
4	rs17021918	94641726	2	ADD	494	1.108	0.1646	0.8022	1.53	0.6215	0.5342
4	rs17021918	94641726	2	DOMDEV	494	1.285	0.2244	0.8278	1.995	1.118	0.2637
4	rs17021918	94641726	2	C2	494	0.5447	0.2386	0.3412	0.8695	-2.546	0.0109
4	rs17021918	94641726	2	C3	494	0.5287	0.2014	0.3562	0.7847	-3.164	0.001558
4	rs17021918	94641726	2	C4	494	5.282	0.2406	3.296	8.465	6.918	4.585e-012
4	rs17021918	94641726	2	GENO_2DF	494	NA	NA	NA	NA	2.718	0.257
4	rs7679673	105140377	1	ADD	474	0.9761	0.1804	0.6854	1.39	-0.134	0.8934
4	rs7679673	105140377	1	DOMDEV	474	0.8921	0.2306	0.5677	1.402	-0.4951	0.6205
4	rs7679673	105140377	1	C2	474	0.557	0.2421	0.3466	0.8953	-2.417	0.01566
4	rs7679673	105140377	1	C3	474	0.5556	0.2055	0.3714	0.8312	-2.859	0.004246
4	rs7679673	105140377	1	C4	474	5.115	0.2432	3.176	8.24	6.711	1.938e-011
4	rs7679673	105140377	1	GENO_2DF	474	NA	NA	NA	NA	0.4092	0.815
5	rs2242652	1279913	2	ADD	539	0.778	0.2494	0.4772	1.269	-1.006	0.3143
5	rs2242652	1279913	2	DOMDEV	539	1.858	0.3117	1.009	3.423	1.988	0.04682
5	rs2242652	1279913	2	C2	539	0.493	0.2321	0.3128	0.7769	-3.048	0.002307
5	rs2242652	1279913	2	C3	539	0.5504	0.1937	0.3765	0.8046	-3.082	0.002056
5	rs2242652	1279913	2	C4	539	3.879	0.2185	2.528	5.953	6.204	5.512e-010
5	rs2242652	1279913	2	GENO_2DF	539	NA	NA	NA	NA	4.292	0.1169
5	rs3877899	42801166	1	ADD	516	0.9116	0.2216	0.5904	1.407	-0.4179	0.6761
5	rs3877899	42801166	1	DOMDEV	516	1.248	0.285	0.714	2.182	0.7777	0.4367
5	rs3877899	42801166	1	C2	516	0.5769	0.2435	0.3579	0.9297	-2.26	0.02385
5	rs3877899	42801166	1	C3	516	0.5306	0.2076	0.3532	0.797	-3.052	0.00227
5	rs3877899	42801166	1	C4	516	4.106	0.2258	2.637	6.391	6.254	3.993e-010
5	rs3877899	42801166	1	GENO_2DF	516	NA	NA	NA	NA	0.6143	0.7355
5	rs2121875	44365443	3	ADD	519	0.9721	0.1417	0.7364	1.283	-0.1996	0.8418
5	rs2121875	44365443	3	DOMDEV	519	1.095	0.2084	0.7281	1.648	0.4372	0.662
5	rs2121875	44365443	3	C2	519	0.5212	0.2347	0.329	0.8256	-2.777	0.005494
5	rs2121875	44365443	3	C3	519	0.5447	0.1954	0.3714	0.7988	-3.11	0.001874
5	rs2121875	44365443	3	C4	519	3.838	0.2186	2.501	5.891	6.153	7.617e-010
5	rs2121875	44365443	3	GENO_2DF	519	NA	NA	NA	NA	0.1963	0.9065
5	rs3733890	79126136	1	ADD	494	1.067	0.195	0.7277	1.563	0.3302	0.7412
5	rs3733890	79126136	1	DOMDEV	494	0.788	0.2476	0.485	1.28	-0.9623	0.3359
5	rs3733890	79126136	1	C2	494	0.5084	0.2417	0.3166	0.8166	-2.798	0.00514
5	rs3733890	79126136	1	C3	494	0.5462	0.204	0.3662	0.8147	-2.964	0.003033
5	rs3733890	79126136	1	C4	494	5.539	0.2416	3.45	8.894	7.086	1.381e-012
5	rs3733890	79126136	1	GENO_2DF	494	NA	NA	NA	NA	0.9942	0.6083
6	rs130067	31150734	4	ADD	520	0.6923	0.2255	0.445	1.077	-1.631	0.1028
6	rs130067	31150734	4	DOMDEV	520	1.136	0.2819	0.654	1.974	0.4532	0.6504
6	rs130067	31150734	4	C2	520	0.481	0.2365	0.3025	0.7646	-3.095	0.001968
6	rs130067	31150734	4	C3	520	0.5429	0.196	0.3698	0.7972	-3.117	0.001829
6	rs130067	31150734	4	C4	520	3.625	0.2187	2.361	5.565	5.888	3.909e-009
6	rs130067	31150734	4	GENO_2DF	520	NA	NA	NA	NA	3.441	0.179
6	rs4880	159692840	2	ADD	518	1.124	0.1488	0.84	1.505	0.7876	0.4309
6	rs4880	159692840	2	DOMDEV	518	0.8072	0.2085	0.5364	1.215	-1.027	0.3043
6	rs4880	159692840	2	C2	518	0.5858	0.2427	0.364	0.9428	-2.203	0.02761
6	rs4880	159692840	2	C3	518	0.5272	0.2078	0.3508	0.7923	-3.08	0.002068
6	rs4880	159692840	2	C4	518	4.267	0.2274	2.732	6.663	6.379	1.781e-010
6	rs4880	159692840	2	GENO_2DF	518	NA	NA	NA	NA	1.598	0.4498
7	rs12155172	20954872	1	ADD	476	0.8412	0.2438	0.5217	1.357	-0.7091	0.4783
7	rs12155172	20954872	1	DOMDEV	476	1.375	0.2998	0.764	2.474	1.062	0.2883
7	rs12155172	20954872	1	C2	476	0.5344	0.2441	0.3313	0.8623	-2.567	0.01025
7	rs12155172	20954872	1	C3	476	0.5813	0.2047	0.3892	0.8682	-2.65	0.008042
7	rs12155172	20954872	1	C4	476	5.095	0.2448	3.153	8.231	6.651	2.909e-011
7	rs12155172	20954872	1	GENO_2DF	476	NA	NA	NA	NA	1.129	0.5686
7	rs10486567	27936944	1	ADD	544	0.7989	0.2443	0.4949	1.29	-0.9189	0.3582
7	rs10486567	27936944	1	DOMDEV	544	0.918	0.2901	0.5199	1.621	-0.2947	0.7682
7	rs10486567	27936944	1	C2	544	0.4435	0.2385	0.2779	0.7078	-3.409	0.0006521
7	rs10486567	27936944	1	C3	544	0.5265	0.1957	0.3587	0.7726	-3.278	0.001044
7	rs10486567	27936944	1	C4	544	4.089	0.218	2.667	6.267	6.461	1.041e-010
7	rs10486567	27936944	1	GENO_2DF	544	NA	NA	NA	NA	2.739	0.2543
7	rs6465657	98187015	4	ADD	480	0.9491	0.1463	0.7124	1.264	-0.3569	0.7211
7	rs6465657	98187015	4	DOMDEV	480	0.9562	0.2061	0.6384	1.432	-0.2174	0.8279
7	rs6465657	98187015	4	C2	480	0.5389	0.2387	0.3376	0.8603	-2.59	0.009585
7	rs6465657	98187015	4	C3	480	0.5677	0.2044	0.3803	0.8476	-2.769	0.005623
7	rs6465657	98187015	4	C4	480	5.053	0.2449	3.127	8.167	6.614	3.74e-011
7	rs6465657	98187015	4	GENO_2DF	480	NA	NA	NA	NA	0.19	0.9094
7	rs10244329	128248636	2	ADD	321	1.639	0.231	1.042	2.577	2.139	0.03245
7	rs10244329	128248636	2	DOMDEV	321	1.072	0.3287	0.563	2.042	0.2121	0.832
7	rs10244329	128248636	2	C2	321	0.4623	0.3815	0.2189	0.9765	-2.022	0.04314
7	rs10244329	128248636	2	C3	321	0.7813	0.3228	0.415	1.471	-0.7645	0.4446
7	rs10244329	128248636	2	C4	321	9.333e+009	5502	0	inf	0.004173	0.9967
7	rs10244329	128248636	2	GENO_2DF	321	NA	NA	NA	NA	5.09	0.07846
7	rs3735035	131195959	2	ADD	472	0.9886	0.1502	0.7365	1.327	-0.07648	0.939
7	rs3735035	131195959	2	DOMDEV	472	1.094	0.208	0.7279	1.645	0.4329	0.6651
7	rs3735035	131195959	2	C2	472	0.5125	0.2451	0.317	0.8285	-2.728	0.00638
7	rs3735035	131195959	2	C3	472	0.5691	0.2071	0.3792	0.854	-2.722	0.00649
7	rs3735035	131195959	2	C4	472	5.426	0.2484	3.334	8.829	6.808	9.918e-012
7	rs3735035	131195959	2	GENO_2DF	472	NA	NA	NA	NA	0.1892	0.9097
8	rs2928679	23438975	2	ADD	488	1.094	0.1491	0.8165	1.465	0.6	0.5485
8	rs2928679	23438975	2	DOMDEV	488	0.7518	0.2054	0.5027	1.124	-1.389	0.1648
8	rs2928679	23438975	2	C2	488	0.5617	0.2381	0.3522	0.8957	-2.423	0.01541
8	rs2928679	23438975	2	C3	488	0.5251	0.2029	0.3528	0.7814	-3.176	0.001496
8	rs2928679	23438975	2	C4	488	5.481	0.2454	3.388	8.867	6.932	4.159e-012
8	rs2928679	23438975	2	GENO_2DF	488	NA	NA	NA	NA	2.168	0.3382
8	rs1512268	23668950	1	ADD	478	0.9182	0.1543	0.6785	1.243	-0.5531	0.5802
8	rs1512268	23668950	1	DOMDEV	478	0.8972	0.2111	0.5932	1.357	-0.5135	0.6076
8	rs1512268	23668950	1	C2	478	0.536	0.2402	0.3347	0.8583	-2.596	0.009422
8	rs1512268	23668950	1	C3	478	0.5625	0.2038	0.3772	0.8387	-2.823	0.004763
8	rs1512268	23668950	1	C4	478	5.003	0.2441	3.101	8.073	6.595	4.254e-011
8	rs1512268	23668950	1	GENO_2DF	478	NA	NA	NA	NA	0.7774	0.6779
8	rs1016343	127081052	2	ADD	457	0.8468	0.2209	0.5492	1.306	-0.7525	0.4517
8	rs1016343	127081052	2	DOMDEV	457	1.505	0.2906	0.8512	2.659	1.406	0.1598
8	rs1016343	127081052	2	C2	457	0.5032	0.2557	0.3048	0.8307	-2.685	0.007246
8	rs1016343	127081052	2	C3	457	0.5582	0.2127	0.3679	0.847	-2.741	0.00613
8	rs1016343	127081052	2	C4	457	6.27	0.2601	3.766	10.44	7.059	1.681e-012
8	rs1016343	127081052	2	GENO_2DF	457	NA	NA	NA	NA	2	0.3679
8	rs13254738	127092098	4	ADD	483	1.116	0.1823	0.7809	1.596	0.6033	0.5463
8	rs13254738	127092098	4	DOMDEV	483	0.9378	0.2373	0.5891	1.493	-0.2705	0.7868
8	rs13254738	127092098	4	C2	483	0.5439	0.2386	0.3408	0.8682	-2.552	0.0107
8	rs13254738	127092098	4	C3	483	0.562	0.2027	0.3778	0.836	-2.844	0.00446
8	rs13254738	127092098	4	C4	483	5.02	0.2425	3.12	8.074	6.652	2.893e-011
8	rs13254738	127092098	4	GENO_2DF	483	NA	NA	NA	NA	0.366	0.8328
8	rs6983561	127094635	4	ADD	486	9.665e-006	1.219e+004	0	inf	-0.0009473	0.9992
8	rs6983561	127094635	4	DOMDEV	486	3.695e+004	1.219e+004	0	inf	0.0008628	0.9993
8	rs6983561	127094635	4	C2	486	0.4496	0.2468	0.2772	0.7292	-3.239	0.001198
8	rs6983561	127094635	4	C3	486	0.5106	0.2057	0.3412	0.7641	-3.268	0.001084
8	rs6983561	127094635	4	C4	486	5.203	0.2451	3.219	8.412	6.73	1.702e-011
8	rs6983561	127094635	4	GENO_2DF	486	NA	NA	NA	NA	8.97	0.01128
8	rs1378897	127110414	1	ADD	485	NA	NA	NA	NA	NA	NA
8	rs1378897	127110414	1	DOMDEV	485	NA	NA	NA	NA	NA	NA
8	rs1378897	127110414	1	C2	485	NA	NA	NA	NA	NA	NA
8	rs1378897	127110414	1	C3	485	NA	NA	NA	NA	NA	NA
8	rs1378897	127110414	1	C4	485	NA	NA	NA	NA	NA	NA
8	rs1378897	127110414	1	GENO_2DF	485	NA	NA	NA	NA	NA	NA
8	rs16902094	127308101	3	ADD	486	1.517	0.3907	0.7051	3.262	1.066	0.2865
8	rs16902094	127308101	3	DOMDEV	486	0.6046	0.4412	0.2546	1.435	-1.141	0.254
8	rs16902094	127308101	3	C2	486	0.5594	0.2407	0.349	0.8965	-2.414	0.01579
8	rs16902094	127308101	3	C3	486	0.5135	0.2035	0.3446	0.7652	-3.275	0.001056
8	rs16902094	127308101	3	C4	486	5.421	0.2425	3.371	8.719	6.972	3.13e-012
8	rs16902094	127308101	3	GENO_2DF	486	NA	NA	NA	NA	1.336	0.5128
8	rs6983267	127401060	2	ADD	493	1.168	0.1466	0.8761	1.556	1.058	0.2902
8	rs6983267	127401060	2	DOMDEV	493	1.329	0.205	0.8892	1.986	1.387	0.1654
8	rs6983267	127401060	2	C2	493	0.5402	0.2409	0.3369	0.8663	-2.556	0.01059
8	rs6983267	127401060	2	C3	493	0.5398	0.2026	0.3629	0.803	-3.043	0.002343
8	rs6983267	127401060	2	C4	493	5.461	0.2417	3.401	8.77	7.024	2.154e-012
8	rs6983267	127401060	2	GENO_2DF	493	NA	NA	NA	NA	3.575	0.1674
8	rs7000448	127428925	2	ADD	477	1.079	0.162	0.7854	1.482	0.4693	0.6388
8	rs7000448	127428925	2	DOMDEV	477	1.094	0.2214	0.7092	1.689	0.4077	0.6835
8	rs7000448	127428925	2	C2	477	0.5475	0.2402	0.3419	0.8766	-2.508	0.01213
8	rs7000448	127428925	2	C3	477	0.5667	0.2059	0.3786	0.8484	-2.759	0.005806
8	rs7000448	127428925	2	C4	477	5.467	0.2475	3.366	8.88	6.865	6.644e-012
8	rs7000448	127428925	2	GENO_2DF	477	NA	NA	NA	NA	0.6153	0.7352
8	rs6470517	127448159	3	ADD	456	1.549	0.4807	0.6039	3.975	0.9107	0.3625
8	rs6470517	127448159	3	DOMDEV	456	0.6758	0.5214	0.2432	1.878	-0.7514	0.4524
8	rs6470517	127448159	3	C2	456	0.5185	0.2526	0.316	0.8505	-2.601	0.009295
8	rs6470517	127448159	3	C3	456	0.6027	0.2117	0.3981	0.9127	-2.392	0.01678
8	rs6470517	127448159	3	C4	456	6.043	0.2661	3.587	10.18	6.761	1.371e-011
8	rs6470517	127448159	3	GENO_2DF	456	NA	NA	NA	NA	0.8432	0.656
8	rs6470494	128087904	2	ADD	483	1.018	0.176	0.7209	1.437	0.1004	0.9201
8	rs6470494	128087904	2	DOMDEV	483	0.8967	0.2358	0.5648	1.424	-0.4625	0.6437
8	rs6470494	128087904	2	C2	483	0.5528	0.2362	0.3479	0.8783	-2.509	0.01209
8	rs6470494	128087904	2	C3	483	0.5373	0.2024	0.3613	0.7989	-3.069	0.002146
8	rs6470494	128087904	2	C4	483	4.855	0.2414	3.025	7.791	6.546	5.916e-011
8	rs6470494	128087904	2	GENO_2DF	483	NA	NA	NA	NA	0.2359	0.8887
8	rs2294008	142680513	2	ADD	479	1.02	0.1517	0.7574	1.372	0.1275	0.8986
8	rs2294008	142680513	2	DOMDEV	479	1.197	0.2126	0.7894	1.816	0.8474	0.3968
8	rs2294008	142680513	2	C2	479	0.5003	0.2486	0.3074	0.8144	-2.786	0.005335
8	rs2294008	142680513	2	C3	479	0.5269	0.2088	0.35	0.7934	-3.069	0.00215
8	rs2294008	142680513	2	C4	479	6.884	0.2582	4.15	11.42	7.471	7.938e-014
8	rs2294008	142680513	2	GENO_2DF	479	NA	NA	NA	NA	0.8114	0.6665
9	rs11536889	117715853	4	ADD	486	1.014	0.2847	0.5801	1.771	0.04726	0.9623
9	rs11536889	117715853	4	DOMDEV	486	0.8085	0.3469	0.4096	1.596	-0.6127	0.54
9	rs11536889	117715853	4	C2	486	0.5013	0.241	0.3126	0.804	-2.865	0.004166
9	rs11536889	117715853	4	C3	486	0.5518	0.2026	0.371	0.8209	-2.934	0.003342
9	rs11536889	117715853	4	C4	486	4.875	0.2416	3.036	7.827	6.556	5.509e-011
9	rs11536889	117715853	4	GENO_2DF	486	NA	NA	NA	NA	0.7598	0.6839
10	rs12529	5136651	3	ADD	538	0.7587	0.1345	0.5829	0.9876	-2.053	0.04006
10	rs12529	5136651	3	DOMDEV	538	1.308	0.2007	0.8824	1.938	1.336	0.1814
10	rs12529	5136651	3	C2	538	0.4733	0.2332	0.2997	0.7475	-3.208	0.001336
10	rs12529	5136651	3	C3	538	0.5288	0.1931	0.3622	0.772	-3.3	0.0009673
10	rs12529	5136651	3	C4	538	3.706	0.216	2.427	5.66	6.066	1.311e-009
10	rs12529	5136651	3	GENO_2DF	538	NA	NA	NA	NA	5.021	0.08121
10	rs10740051	46025670	1	ADD	479	1.272	0.2125	0.839	1.93	1.134	0.2568
10	rs10740051	46025670	1	DOMDEV	479	0.7604	0.2652	0.4522	1.279	-1.033	0.3017
10	rs10740051	46025670	1	C2	479	0.5109	0.2409	0.3186	0.8191	-2.788	0.005301
10	rs10740051	46025670	1	C3	479	0.5902	0.2074	0.3931	0.8863	-2.542	0.01102
10	rs10740051	46025670	1	C4	479	5.579	0.249	3.425	9.09	6.904	5.071e-012
10	rs10740051	46025670	1	GENO_2DF	479	NA	NA	NA	NA	1.469	0.4796
10	rs7920517	46063201	3	ADD	473	0.6286	0.1482	0.4701	0.8405	-3.132	0.001734
10	rs7920517	46063201	3	DOMDEV	473	1.167	0.2085	0.7757	1.757	0.7419	0.4582
10	rs7920517	46063201	3	C2	473	0.5031	0.2459	0.3107	0.8146	-2.794	0.005209
10	rs7920517	46063201	3	C3	473	0.5522	0.2089	0.3667	0.8316	-2.843	0.004474
10	rs7920517	46063201	3	C4	473	5.956	0.2543	3.619	9.804	7.018	2.243e-012
10	rs7920517	46063201	3	GENO_2DF	473	NA	NA	NA	NA	10.16	0.006233
10	rs6162	102837224	1	ADD	538	1.174	0.1484	0.878	1.571	1.083	0.2787
10	rs6162	102837224	1	DOMDEV	538	0.906	0.2043	0.607	1.352	-0.4831	0.629
10	rs6162	102837224	1	C2	538	0.4995	0.2291	0.3188	0.7826	-3.03	0.002445
10	rs6162	102837224	1	C3	538	0.5314	0.1924	0.3644	0.7748	-3.286	0.001017
10	rs6162	102837224	1	C4	538	3.92	0.2187	2.554	6.018	6.247	4.176e-010
10	rs6162	102837224	1	GENO_2DF	538	NA	NA	NA	NA	1.191	0.5514
10	rs4962416	125008303	4	ADD	551	1.045	0.2139	0.6869	1.589	0.2039	0.8384
10	rs4962416	125008303	4	DOMDEV	551	0.7792	0.2598	0.4683	1.297	-0.9605	0.3368
10	rs4962416	125008303	4	C2	551	0.5035	0.2298	0.3209	0.79	-2.986	0.002826
10	rs4962416	125008303	4	C3	551	0.5293	0.1929	0.3627	0.7724	-3.299	0.0009699
10	rs4962416	125008303	4	C4	551	4.123	0.2169	2.696	6.307	6.533	6.467e-011
10	rs4962416	125008303	4	GENO_2DF	551	NA	NA	NA	NA	1.258	0.5332
11	rs7127900	2212344	1	ADD	485	0.9436	0.1978	0.6404	1.39	-0.2934	0.7692
11	rs7127900	2212344	1	DOMDEV	485	1.308	0.2664	0.7758	2.204	1.007	0.3138
11	rs7127900	2212344	1	C2	485	0.542	0.2406	0.3383	0.8686	-2.546	0.01091
11	rs7127900	2212344	1	C3	485	0.5134	0.2042	0.344	0.766	-3.265	0.001094
11	rs7127900	2212344	1	C4	485	5.639	0.246	3.482	9.133	7.031	2.051e-012
11	rs7127900	2212344	1	GENO_2DF	485	NA	NA	NA	NA	1.133	0.5675
11	rs1001179	34438684	2	ADD	512	0.6878	0.2512	0.4204	1.125	-1.49	0.1363
11	rs1001179	34438684	2	DOMDEV	512	1.459	0.3055	0.8015	2.654	1.236	0.2166
11	rs1001179	34438684	2	C2	512	0.5842	0.2445	0.3618	0.9434	-2.198	0.02792
11	rs1001179	34438684	2	C3	512	0.5079	0.2094	0.3369	0.7656	-3.236	0.001214
11	rs1001179	34438684	2	C4	512	4.479	0.2298	2.855	7.027	6.526	6.736e-011
11	rs1001179	34438684	2	GENO_2DF	512	NA	NA	NA	NA	2.289	0.3184
11	rs2727270	61603237	2	ADD	490	0.3203	0.5829	0.1022	1.004	-1.953	0.05077
11	rs2727270	61603237	2	DOMDEV	490	2.259	0.6251	0.6635	7.692	1.304	0.1924
11	rs2727270	61603237	2	C2	490	0.4078	0.2416	0.254	0.6548	-3.713	0.0002051
11	rs2727270	61603237	2	C3	490	0.5195	0.2051	0.3475	0.7766	-3.193	0.001409
11	rs2727270	61603237	2	C4	490	5.154	0.2383	3.231	8.222	6.881	5.957e-012
11	rs2727270	61603237	2	GENO_2DF	490	NA	NA	NA	NA	5.226	0.07331
11	rs174448	61872101	4	ADD	539	1.021	0.1562	0.7516	1.387	0.1326	0.8945
11	rs174448	61872101	4	DOMDEV	539	0.8259	0.2087	0.5486	1.243	-0.9169	0.3592
11	rs174448	61872101	4	C2	539	0.4811	0.2324	0.3051	0.7587	-3.148	0.001644
11	rs174448	61872101	4	C3	539	0.552	0.1931	0.378	0.806	-3.077	0.002093
11	rs174448	61872101	4	C4	539	3.851	0.2174	2.515	5.897	6.202	5.571e-010
11	rs174448	61872101	4	GENO_2DF	539	NA	NA	NA	NA	0.8954	0.6391
11	rs10896438	69139102	3	ADD	540	0.5883	0.1504	0.4381	0.7901	-3.526	0.0004214
11	rs10896438	69139102	3	DOMDEV	540	1.162	0.2105	0.7693	1.755	0.7138	0.4753
11	rs10896438	69139102	3	C2	540	0.4767	0.2334	0.3017	0.7532	-3.174	0.001502
11	rs10896438	69139102	3	C3	540	0.5062	0.1957	0.3449	0.7429	-3.479	0.0005036
11	rs10896438	69139102	3	C4	540	4.019	0.2209	2.607	6.196	6.298	3.021e-010
11	rs10896438	69139102	3	GENO_2DF	540	NA	NA	NA	NA	12.76	0.001695
11	rs11228565	69211113	1	ADD	492	0.5971	0.2792	0.3455	1.032	-1.847	0.06476
11	rs11228565	69211113	1	DOMDEV	492	1.121	0.3276	0.5899	2.13	0.3487	0.7273
11	rs11228565	69211113	1	C2	492	0.5214	0.2402	0.3256	0.835	-2.711	0.006713
11	rs11228565	69211113	1	C3	492	0.5428	0.2032	0.3644	0.8084	-3.007	0.002642
11	rs11228565	69211113	1	C4	492	5.502	0.2447	3.406	8.887	6.969	3.185e-012
11	rs11228565	69211113	1	GENO_2DF	492	NA	NA	NA	NA	6.071	0.04805
11	rs7931342	69227030	2	ADD	486	1.705	0.1514	1.267	2.294	3.525	0.0004234
11	rs7931342	69227030	2	DOMDEV	486	1.065	0.2076	0.709	1.6	0.3032	0.7617
11	rs7931342	69227030	2	C2	486	0.5069	0.2463	0.3128	0.8214	-2.759	0.005804
11	rs7931342	69227030	2	C3	486	0.508	0.2064	0.339	0.7613	-3.282	0.001032
11	rs7931342	69227030	2	C4	486	5.27	0.2438	3.268	8.497	6.818	9.224e-012
11	rs7931342	69227030	2	GENO_2DF	486	NA	NA	NA	NA	12.91	0.001575
12	rs3782905	47872384	3	ADD	449	0.9397	0.1773	0.6639	1.33	-0.3506	0.7259
12	rs3782905	47872384	3	DOMDEV	449	1.734	0.2472	1.068	2.815	2.226	0.02601
12	rs3782905	47872384	3	C2	449	0.5954	0.2502	0.3646	0.9723	-2.072	0.03823
12	rs3782905	47872384	3	C3	449	0.5471	0.2175	0.3572	0.8379	-2.773	0.005555
12	rs3782905	47872384	3	C4	449	6.497	0.2711	3.819	11.05	6.903	5.081e-012
12	rs3782905	47872384	3	GENO_2DF	449	NA	NA	NA	NA	5.457	0.06532
12	rs7299460	48296268	2	ADD	452	1.245	0.194	0.851	1.82	1.128	0.2593
12	rs7299460	48296268	2	DOMDEV	452	0.8631	0.2558	0.5228	1.425	-0.5755	0.565
12	rs7299460	48296268	2	C2	452	0.4888	0.2627	0.2921	0.8179	-2.725	0.006429
12	rs7299460	48296268	2	C3	452	0.4732	0.2232	0.3056	0.7329	-3.353	0.0008008
12	rs7299460	48296268	2	C4	452	9.209	0.2803	5.316	15.95	7.921	2.352e-015
12	rs7299460	48296268	2	GENO_2DF	452	NA	NA	NA	NA	1.273	0.5291
12	rs6823	48362412	3	ADD	478	1.231	0.1469	0.9228	1.641	1.413	0.1577
12	rs6823	48362412	3	DOMDEV	478	1.016	0.2056	0.6791	1.52	0.07767	0.9381
12	rs6823	48362412	3	C2	478	0.5321	0.2406	0.3321	0.8527	-2.622	0.00873
12	rs6823	48362412	3	C3	478	0.5677	0.2042	0.3804	0.8472	-2.772	0.00557
12	rs6823	48362412	3	C4	478	5.019	0.2424	3.121	8.072	6.654	2.844e-011
12	rs6823	48362412	3	GENO_2DF	478	NA	NA	NA	NA	2.074	0.3545
12	rs2071358	48366449	1	ADD	480	1.278	0.3481	0.646	2.528	0.7047	0.481
12	rs2071358	48366449	1	DOMDEV	480	0.4471	0.4037	0.2027	0.9863	-1.994	0.04613
12	rs2071358	48366449	1	C2	480	0.4757	0.2448	0.2944	0.7685	-3.036	0.0024
12	rs2071358	48366449	1	C3	480	0.5491	0.2051	0.3674	0.8208	-2.923	0.003466
12	rs2071358	48366449	1	C4	480	5.137	0.2456	3.174	8.313	6.662	2.703e-011
12	rs2071358	48366449	1	GENO_2DF	480	NA	NA	NA	NA	6.403	0.0407
12	rs10875943	49282227	4	ADD	513	0.9974	0.1889	0.6888	1.444	-0.01402	0.9888
12	rs10875943	49282227	4	DOMDEV	513	0.7069	0.2409	0.4409	1.133	-1.44	0.1499
12	rs10875943	49282227	4	C2	513	0.4583	0.2343	0.2895	0.7254	-3.33	0.0008677
12	rs10875943	49282227	4	C3	513	0.5161	0.1978	0.3502	0.7605	-3.344	0.0008256
12	rs10875943	49282227	4	C4	513	4.079	0.2239	2.63	6.325	6.28	3.392e-010
12	rs10875943	49282227	4	GENO_2DF	513	NA	NA	NA	NA	3.055	0.2171
12	rs902774	52880120	1	ADD	494	0.7839	0.4234	0.3418	1.798	-0.5751	0.5652
12	rs902774	52880120	1	DOMDEV	494	1.204	0.4687	0.4804	3.016	0.3955	0.6924
12	rs902774	52880120	1	C2	494	0.5159	0.241	0.3217	0.8275	-2.746	0.00604
12	rs902774	52880120	1	C3	494	0.5304	0.203	0.3563	0.7897	-3.123	0.001791
12	rs902774	52880120	1	C4	494	5.493	0.2412	3.423	8.813	7.061	1.649e-012
12	rs902774	52880120	1	GENO_2DF	494	NA	NA	NA	NA	0.3758	0.8287
12	rs2279744	68808800	3	ADD	464	1.034	0.1609	0.7544	1.417	0.2079	0.8353
12	rs2279744	68808800	3	DOMDEV	464	1.013	0.2297	0.6458	1.589	0.05639	0.955
12	rs2279744	68808800	3	C2	464	0.492	0.2468	0.3033	0.7981	-2.874	0.004058
12	rs2279744	68808800	3	C3	464	0.5268	0.2097	0.3492	0.7947	-3.056	0.002245
12	rs2279744	68808800	3	C4	464	5.651	0.256	3.422	9.332	6.766	1.325e-011
12	rs2279744	68808800	3	GENO_2DF	464	NA	NA	NA	NA	0.06443	0.9683
12	rs2946834	102394036	2	ADD	535	1.147	0.1764	0.8114	1.62	0.7754	0.4381
12	rs2946834	102394036	2	DOMDEV	535	0.8268	0.2309	0.5259	1.3	-0.8238	0.4101
12	rs2946834	102394036	2	C2	535	0.477	0.2327	0.3023	0.7526	-3.182	0.001464
12	rs2946834	102394036	2	C3	535	0.5262	0.1945	0.3594	0.7703	-3.302	0.0009611
12	rs2946834	102394036	2	C4	535	4.099	0.22	2.663	6.308	6.413	1.429e-010
12	rs2946834	102394036	2	GENO_2DF	535	NA	NA	NA	NA	0.8402	0.657
12	rs7965399	102497908	4	ADD	515	NA	NA	NA	NA	NA	NA
12	rs7965399	102497908	4	DOMDEV	515	NA	NA	NA	NA	NA	NA
12	rs7965399	102497908	4	C2	515	NA	NA	NA	NA	NA	NA
12	rs7965399	102497908	4	C3	515	NA	NA	NA	NA	NA	NA
12	rs7965399	102497908	4	C4	515	NA	NA	NA	NA	NA	NA
12	rs7965399	102497908	4	GENO_2DF	515	NA	NA	NA	NA	NA	NA
15	rs28665122	101277522	1	ADD	497	0.9956	0.4085	0.4471	2.217	-0.0108	0.9914
15	rs28665122	101277522	1	DOMDEV	497	1.777	0.4839	0.6882	4.586	1.188	0.235
15	rs28665122	101277522	1	C2	497	0.592	0.2515	0.3616	0.9692	-2.084	0.03712
15	rs28665122	101277522	1	C3	497	0.5107	0.2144	0.3355	0.7773	-3.135	0.001717
15	rs28665122	101277522	1	C4	497	5.119	0.2404	3.195	8.2	6.792	1.105e-011
15	rs28665122	101277522	1	GENO_2DF	497	NA	NA	NA	NA	4.135	0.1265
15	rs4965373	101812395	1	ADD	517	1.012	0.1752	0.7176	1.426	0.06628	0.9472
15	rs4965373	101812395	1	DOMDEV	517	0.9929	0.2375	0.6233	1.582	-0.03002	0.9761
15	rs4965373	101812395	1	C2	517	0.5868	0.2425	0.3649	0.9438	-2.198	0.02791
15	rs4965373	101812395	1	C3	517	0.532	0.2084	0.3536	0.8005	-3.028	0.002463
15	rs4965373	101812395	1	C4	517	4.13	0.2261	2.651	6.433	6.272	3.56e-010
15	rs4965373	101812395	1	GENO_2DF	517	NA	NA	NA	NA	0.004394	0.9978
16	rs1529916	8897333	2	ADD	475	1.273	0.1773	0.899	1.802	1.359	0.174
16	rs1529916	8897333	2	DOMDEV	475	0.8353	0.2383	0.5236	1.333	-0.7551	0.4502
16	rs1529916	8897333	2	C2	475	0.522	0.2424	0.3246	0.8394	-2.682	0.007314
16	rs1529916	8897333	2	C3	475	0.5963	0.2054	0.3987	0.8918	-2.517	0.01183
16	rs1529916	8897333	2	C4	475	5.306	0.2464	3.273	8.601	6.772	1.269e-011
16	rs1529916	8897333	2	GENO_2DF	475	NA	NA	NA	NA	1.859	0.3947
16	rs9939609	53786615	1	ADD	484	0.8307	0.1612	0.6057	1.139	-1.15	0.25
16	rs9939609	53786615	1	DOMDEV	484	0.7072	0.2156	0.4635	1.079	-1.607	0.1081
16	rs9939609	53786615	1	C2	484	0.5193	0.2395	0.3248	0.8304	-2.736	0.00622
16	rs9939609	53786615	1	C3	484	0.5353	0.2054	0.3579	0.8007	-3.042	0.00235
16	rs9939609	53786615	1	C4	484	5.001	0.2442	3.099	8.072	6.591	4.379e-011
16	rs9939609	53786615	1	GENO_2DF	484	NA	NA	NA	NA	5.808	0.05481
17	rs11545302	12899963	3	ADD	388	0.9617	0.2326	0.6096	1.517	-0.1677	0.8668
17	rs11545302	12899963	3	DOMDEV	388	0.8191	0.2965	0.4581	1.465	-0.673	0.5009
17	rs11545302	12899963	3	C2	388	0.2699	0.3	0.1499	0.4859	-4.366	1.264e-005
17	rs11545302	12899963	3	C3	388	0.4486	0.2548	0.2723	0.7391	-3.146	0.001653
17	rs11545302	12899963	3	C4	388	3.142e+009	2709	0	inf	0.008071	0.9936
17	rs11545302	12899963	3	GENO_2DF	388	NA	NA	NA	NA	0.8124	0.6662
17	rs17552022	12994978	4	ADD	525	0.9845	0.5865	0.3119	3.108	-0.02658	0.9788
17	rs17552022	12994978	4	DOMDEV	525	1.18	0.6224	0.3484	3.996	0.2658	0.7904
17	rs17552022	12994978	4	C2	525	0.5062	0.2307	0.3221	0.7956	-2.951	0.003169
17	rs17552022	12994978	4	C3	525	0.5345	0.1937	0.3657	0.7812	-3.235	0.001218
17	rs17552022	12994978	4	C4	525	3.604	0.2173	2.354	5.518	5.9	3.645e-009
17	rs17552022	12994978	4	GENO_2DF	525	NA	NA	NA	NA	0.4131	0.8134
17	rs4054823	13721707	4	ADD	485	0.7983	0.1438	0.6022	1.058	-1.566	0.1172
17	rs4054823	13721707	4	DOMDEV	485	1.418	0.2058	0.9471	2.122	1.696	0.08987
17	rs4054823	13721707	4	C2	485	0.5281	0.238	0.3312	0.8421	-2.682	0.007321
17	rs4054823	13721707	4	C3	485	0.5417	0.2029	0.364	0.8061	-3.022	0.002509
17	rs4054823	13721707	4	C4	485	5.039	0.2432	3.129	8.115	6.651	2.919e-011
17	rs4054823	13721707	4	GENO_2DF	485	NA	NA	NA	NA	4.571	0.1017
17	rs3094509	37702294	2	ADD	534	1.037	0.1586	0.7602	1.416	0.2315	0.8169
17	rs3094509	37702294	2	DOMDEV	534	1.136	0.215	0.7455	1.731	0.5938	0.5526
17	rs3094509	37702294	2	C2	534	0.4841	0.2329	0.3067	0.7641	-3.115	0.001839
17	rs3094509	37702294	2	C3	534	0.5424	0.1941	0.3708	0.7936	-3.151	0.001627
17	rs3094509	37702294	2	C4	534	4.079	0.2194	2.653	6.271	6.407	1.483e-010
17	rs3094509	37702294	2	GENO_2DF	534	NA	NA	NA	NA	0.6346	0.7281
17	rs4794758	37720433	2	ADD	525	0.8262	0.1869	0.5728	1.192	-1.022	0.3069
17	rs4794758	37720433	2	DOMDEV	525	1.376	0.2466	0.8489	2.232	1.296	0.195
17	rs4794758	37720433	2	C2	525	0.536	0.2333	0.3393	0.8466	-2.674	0.007498
17	rs4794758	37720433	2	C3	525	0.5289	0.1942	0.3615	0.7739	-3.28	0.001037
17	rs4794758	37720433	2	C4	525	3.938	0.219	2.564	6.049	6.26	3.856e-010
17	rs4794758	37720433	2	GENO_2DF	525	NA	NA	NA	NA	1.792	0.4082
17	rs1016990	37728924	3	ADD	538	1.164	0.1608	0.8495	1.596	0.9454	0.3445
17	rs1016990	37728924	3	DOMDEV	538	1.119	0.2165	0.7322	1.711	0.5202	0.6029
17	rs1016990	37728924	3	C2	538	0.4947	0.2304	0.3149	0.7771	-3.055	0.002252
17	rs1016990	37728924	3	C3	538	0.5507	0.1934	0.377	0.8044	-3.085	0.002033
17	rs1016990	37728924	3	C4	538	4.066	0.2192	2.646	6.249	6.4	1.554e-010
17	rs1016990	37728924	3	GENO_2DF	538	NA	NA	NA	NA	1.98	0.3715
17	rs799923	41251931	1	ADD	539	0.6675	0.2276	0.4273	1.043	-1.776	0.07569
17	rs799923	41251931	1	DOMDEV	539	1.147	0.2801	0.6626	1.986	0.4903	0.6239
17	rs799923	41251931	1	C2	539	0.5086	0.23	0.324	0.7982	-2.94	0.003282
17	rs799923	41251931	1	C3	539	0.5024	0.1933	0.3439	0.7338	-3.561	0.0003697
17	rs799923	41251931	1	C4	539	4.098	0.2208	2.659	6.316	6.389	1.668e-010
17	rs799923	41251931	1	GENO_2DF	539	NA	NA	NA	NA	4.181	0.1236
17	rs983085	69212061	3	ADD	487	0.9447	0.1432	0.7135	1.251	-0.3977	0.6909
17	rs983085	69212061	3	DOMDEV	487	1.045	0.2031	0.7017	1.556	0.216	0.829
17	rs983085	69212061	3	C2	487	0.5375	0.241	0.3351	0.8621	-2.576	0.01001
17	rs983085	69212061	3	C3	487	0.5351	0.2035	0.3591	0.7974	-3.073	0.002123
17	rs983085	69212061	3	C4	487	5.334	0.2405	3.33	8.546	6.963	3.34e-012
17	rs983085	69212061	3	GENO_2DF	487	NA	NA	NA	NA	0.1949	0.9071
17	rs1859962	71112612	3	ADD	484	0.928	0.1509	0.6905	1.247	-0.4953	0.6204
17	rs1859962	71112612	3	DOMDEV	484	0.867	0.2058	0.5792	1.298	-0.6934	0.488
17	rs1859962	71112612	3	C2	484	0.5399	0.2391	0.3379	0.8626	-2.578	0.009928
17	rs1859962	71112612	3	C3	484	0.5658	0.2034	0.3798	0.843	-2.799	0.005121
17	rs1859962	71112612	3	C4	484	5.05	0.2421	3.142	8.116	6.689	2.239e-011
17	rs1859962	71112612	3	GENO_2DF	484	NA	NA	NA	NA	0.8315	0.6599
17	rs8066956	80034443	2	ADD	478	0.9386	0.2718	0.551	1.599	-0.2333	0.8155
17	rs8066956	80034443	2	DOMDEV	478	1.243	0.3264	0.6556	2.357	0.6666	0.505
17	rs8066956	80034443	2	C2	478	0.5301	0.2422	0.3297	0.8522	-2.62	0.008785
17	rs8066956	80034443	2	C3	478	0.564	0.2046	0.3777	0.8423	-2.799	0.005128
17	rs8066956	80034443	2	C4	478	4.73	0.2407	2.951	7.58	6.456	1.074e-010
17	rs8066956	80034443	2	GENO_2DF	478	NA	NA	NA	NA	0.5995	0.741
17	rs6502051	80059332	1	ADD	480	1.259	0.1517	0.935	1.694	1.517	0.1294
17	rs6502051	80059332	1	DOMDEV	480	0.9882	0.21	0.6548	1.492	-0.05629	0.9551
17	rs6502051	80059332	1	C2	480	0.5183	0.243	0.3219	0.8344	-2.705	0.006831
17	rs6502051	80059332	1	C3	480	0.5337	0.205	0.3571	0.7975	-3.063	0.002188
17	rs6502051	80059332	1	C4	480	5.461	0.2444	3.383	8.816	6.947	3.741e-012
17	rs6502051	80059332	1	GENO_2DF	480	NA	NA	NA	NA	2.388	0.3029
17	rs1127678	82101611	1	ADD	321	0.7871	0.4068	0.3546	1.747	-0.5884	0.5562
17	rs1127678	82101611	1	DOMDEV	321	0.5332	0.4685	0.2129	1.336	-1.342	0.1795
17	rs1127678	82101611	1	C2	321	0.528	0.3875	0.247	1.128	-1.648	0.09925
17	rs1127678	82101611	1	C3	321	0.9136	0.3323	0.4763	1.752	-0.2719	0.7857
17	rs1127678	82101611	1	C4	321	1.173e+010	5692	0	inf	0.004074	0.9967
17	rs1127678	82101611	1	GENO_2DF	321	NA	NA	NA	NA	6.631	0.03632
19	rs713041	1106616	2	ADD	518	0.9512	0.1488	0.7106	1.273	-0.3361	0.7368
19	rs713041	1106616	2	DOMDEV	518	0.8182	0.2092	0.5429	1.233	-0.9592	0.3375
19	rs713041	1106616	2	C2	518	0.5877	0.2428	0.3652	0.9459	-2.189	0.02861
19	rs713041	1106616	2	C3	518	0.5249	0.208	0.3491	0.7891	-3.098	0.001946
19	rs713041	1106616	2	C4	518	4.18	0.2271	2.678	6.523	6.299	2.999e-010
19	rs713041	1106616	2	GENO_2DF	518	NA	NA	NA	NA	1.127	0.5692
19	rs8102476	38244973	2	ADD	483	1.172	0.144	0.8838	1.554	1.103	0.2702
19	rs8102476	38244973	2	DOMDEV	483	0.8423	0.2045	0.5642	1.257	-0.8394	0.4013
19	rs8102476	38244973	2	C2	483	0.5257	0.2379	0.3298	0.8381	-2.702	0.006883
19	rs8102476	38244973	2	C3	483	0.547	0.2023	0.3679	0.8131	-2.983	0.002855
19	rs8102476	38244973	2	C4	483	4.846	0.2418	3.017	7.784	6.526	6.735e-011
19	rs8102476	38244973	2	GENO_2DF	483	NA	NA	NA	NA	1.676	0.4325
19	rs887391	41479716	4	ADD	479	1.639	0.2458	1.012	2.653	2.009	0.04449
19	rs887391	41479716	4	DOMDEV	479	0.8389	0.3071	0.4595	1.531	-0.5722	0.5672
19	rs887391	41479716	4	C2	479	0.5165	0.2411	0.322	0.8285	-2.741	0.006133
19	rs887391	41479716	4	C3	479	0.568	0.2043	0.3806	0.8476	-2.77	0.005613
19	rs887391	41479716	4	C4	479	4.91	0.2446	3.04	7.93	6.504	7.801e-011
19	rs887391	41479716	4	GENO_2DF	479	NA	NA	NA	NA	5.344	0.06911
19	rs2659056	50832687	3	ADD	484	1.402	0.2038	0.9403	2.091	1.658	0.0973
19	rs2659056	50832687	3	DOMDEV	484	1.033	0.259	0.622	1.717	0.127	0.8989
19	rs2659056	50832687	3	C2	484	0.5189	0.2382	0.3253	0.8278	-2.753	0.005898
19	rs2659056	50832687	3	C3	484	0.5572	0.2027	0.3745	0.829	-2.885	0.003913
19	rs2659056	50832687	3	C4	484	5.013	0.2441	3.107	8.089	6.604	4.013e-011
19	rs2659056	50832687	3	GENO_2DF	484	NA	NA	NA	NA	4.689	0.09588
19	rs17632542	50858501	4	ADD	545	0.6619	0.7226	0.1606	2.728	-0.5711	0.5679
19	rs17632542	50858501	4	DOMDEV	545	0.6862	0.777	0.1496	3.147	-0.4847	0.6279
19	rs17632542	50858501	4	C2	545	0.4944	0.229	0.3156	0.7745	-3.075	0.002102
19	rs17632542	50858501	4	C3	545	0.4908	0.1938	0.3357	0.7176	-3.673	0.00024
19	rs17632542	50858501	4	C4	545	3.937	0.218	2.568	6.035	6.286	3.264e-010
19	rs17632542	50858501	4	GENO_2DF	545	NA	NA	NA	NA	7.152	0.02799
19	rs1354774	50889862	4	ADD	541	0.8618	0.146	0.6473	1.147	-1.019	0.3084
19	rs1354774	50889862	4	DOMDEV	541	1.209	0.2064	0.8068	1.812	0.92	0.3576
19	rs1354774	50889862	4	C2	541	0.4848	0.2305	0.3086	0.7617	-3.14	0.001687
19	rs1354774	50889862	4	C3	541	0.541	0.1922	0.3712	0.7884	-3.197	0.00139
19	rs1354774	50889862	4	C4	541	3.871	0.2173	2.528	5.926	6.229	4.698e-010
19	rs1354774	50889862	4	GENO_2DF	541	NA	NA	NA	NA	1.405	0.4953
19	rs2659122	51363026	3	ADD	485	0.5874	0.2191	0.3823	0.9024	-2.429	0.01516
19	rs2659122	51363026	3	DOMDEV	485	1.293	0.2699	0.7618	2.194	0.9517	0.3413
19	rs2659122	51363026	3	C2	485	0.5099	0.2391	0.3191	0.8148	-2.816	0.004858
19	rs2659122	51363026	3	C3	485	0.5503	0.2035	0.3694	0.82	-2.935	0.003334
19	rs2659122	51363026	3	C4	485	5.227	0.2452	3.233	8.451	6.746	1.522e-011
19	rs2659122	51363026	3	GENO_2DF	485	NA	NA	NA	NA	6.534	0.03812
19	rs1506684	51371419	2	ADD	481	0.9204	0.1414	0.6976	1.214	-0.5867	0.5574
19	rs1506684	51371419	2	DOMDEV	481	1.098	0.2057	0.7339	1.644	0.4559	0.6484
19	rs1506684	51371419	2	C2	481	0.5209	0.2372	0.3272	0.8292	-2.749	0.00597
19	rs1506684	51371419	2	C3	481	0.5506	0.2023	0.3704	0.8185	-2.95	0.003178
19	rs1506684	51371419	2	C4	481	4.807	0.2422	2.99	7.727	6.482	9.058e-011
19	rs1506684	51371419	2	GENO_2DF	481	NA	NA	NA	NA	0.4727	0.7895
20	rs3918256	44640959	3	ADD	525	0.7914	0.1417	0.5995	1.045	-1.651	0.09868
20	rs3918256	44640959	3	DOMDEV	525	1.211	0.202	0.8151	1.799	0.9477	0.3433
20	rs3918256	44640959	3	C2	525	0.4775	0.2349	0.3013	0.7567	-3.147	0.00165
20	rs3918256	44640959	3	C3	525	0.5356	0.1963	0.3645	0.7869	-3.181	0.00147
20	rs3918256	44640959	3	C4	525	4.308	0.2253	2.77	6.699	6.484	8.96e-011
20	rs3918256	44640959	3	GENO_2DF	525	NA	NA	NA	NA	3.056	0.2169
20	rs3787268	46013092	1	ADD	402	0.7744	0.2778	0.4493	1.335	-0.9206	0.3573
20	rs3787268	46013092	1	DOMDEV	402	1.393	0.362	0.6854	2.832	0.9161	0.3596
20	rs3787268	46013092	1	C2	402	0.5426	0.2911	0.3067	0.9599	-2.101	0.03568
20	rs3787268	46013092	1	C3	402	0.6418	0.2476	0.395	1.043	-1.791	0.07326
20	rs3787268	46013092	1	C4	402	2.953	0.2896	1.674	5.208	3.739	0.0001847
20	rs3787268	46013092	1	GENO_2DF	402	NA	NA	NA	NA	1.02	0.6005
20	rs3787557	52783135	4	ADD	484	0.8969	0.7676	0.1992	4.038	-0.1418	0.8873
20	rs3787557	52783135	4	DOMDEV	484	0.9639	0.7941	0.2033	4.571	-0.04627	0.9631
20	rs3787557	52783135	4	C2	484	0.527	0.2379	0.3305	0.8401	-2.692	0.007093
20	rs3787557	52783135	4	C3	484	0.5384	0.2024	0.3621	0.8004	-3.06	0.002212
20	rs3787557	52783135	4	C4	484	4.845	0.2412	3.02	7.774	6.542	6.064e-011
20	rs3787557	52783135	4	GENO_2DF	484	NA	NA	NA	NA	0.4054	0.8165
20	rs2762939	54164712	4	ADD	499	0.8758	0.2133	0.5765	1.33	-0.6219	0.534
20	rs2762939	54164712	4	DOMDEV	499	1.302	0.2678	0.7705	2.201	0.9864	0.3239
20	rs2762939	54164712	4	C2	499	0.5089	0.2391	0.3185	0.8132	-2.824	0.004736
20	rs2762939	54164712	4	C3	499	0.5185	0.2005	0.35	0.7681	-3.276	0.001054
20	rs2762939	54164712	4	C4	499	5.26	0.2407	3.282	8.43	6.897	5.311e-012
20	rs2762939	54164712	4	GENO_2DF	499	NA	NA	NA	NA	0.9732	0.6147
20	rs2296241	54169680	3	ADD	489	1.015	0.1422	0.768	1.341	0.1038	0.9173
20	rs2296241	54169680	3	DOMDEV	489	1.061	0.2034	0.7122	1.581	0.2917	0.7705
20	rs2296241	54169680	3	C2	489	0.5464	0.2392	0.3419	0.8733	-2.526	0.01153
20	rs2296241	54169680	3	C3	489	0.5218	0.2035	0.3501	0.7775	-3.197	0.001389
20	rs2296241	54169680	3	C4	489	5.496	0.2423	3.418	8.837	7.031	2.051e-012
20	rs2296241	54169680	3	GENO_2DF	489	NA	NA	NA	NA	0.1009	0.9508
23	rs5945619	51498820	4	ADD	483	NA	NA	NA	NA	NA	NA
23	rs5945619	51498820	4	DOMDEV	483	NA	NA	NA	NA	NA	NA
23	rs5945619	51498820	4	C2	483	NA	NA	NA	NA	NA	NA
23	rs5945619	51498820	4	C3	483	NA	NA	NA	NA	NA	NA
23	rs5945619	51498820	4	C4	483	NA	NA	NA	NA	NA	NA
23	rs5945619	51498820	4	GENO_2DF	483	NA	NA	NA	NA	NA	NA
23	rs5919432	67801708	4	ADD	513	NA	NA	NA	NA	NA	NA
23	rs5919432	67801708	4	DOMDEV	513	NA	NA	NA	NA	NA	NA
23	rs5919432	67801708	4	C2	513	NA	NA	NA	NA	NA	NA
23	rs5919432	67801708	4	C3	513	NA	NA	NA	NA	NA	NA
23	rs5919432	67801708	4	C4	513	NA	NA	NA	NA	NA	NA
23	rs5919432	67801708	4	GENO_2DF	513	NA	NA	NA	NA	NA	NA

## Sheet: Agg_vs_NAgg_Adjusted
CHR	SNP	UNADJ	GC	BONF	HOLM	SIDAK_SS	SIDAK_SD	FDR_BH	FDR_BY
2	rs632148	0.01196	0.01196	1	1	0.6961	0.6961	0.8813	1
7	rs10244329	0.02893	0.02893	1	1	0.9453	0.9437	0.8813	1
20	rs3918256	0.03109	0.03109	1	1	0.9561	0.9533	0.8813	1
7	rs3735035	0.03561	0.03561	1	1	0.9724	0.9692	0.8813	1
17	rs8066956	0.06228	0.06228	1	1	0.9983	0.9978	0.9135	1
19	rs713041	0.06252	0.06252	1	1	0.9983	0.9978	0.9135	1
11	rs10896438	0.06459	0.06459	1	1	0.9987	0.998	0.9135	1
10	rs4962416	0.09301	0.09301	1	1	0.9999	0.9999	1	1
8	rs2294008	0.106	0.106	1	1	1	1	1	1
8	rs6983267	0.1431	0.1431	1	1	1	1	1	1
15	rs4965373	0.1537	0.1537	1	1	1	1	1	1
16	rs9939609	0.1808	0.1808	1	1	1	1	1	1
10	rs10740051	0.1824	0.1824	1	1	1	1	1	1
19	rs1354774	0.231	0.231	1	1	1	1	1	1
6	rs130067	0.2316	0.2316	1	1	1	1	1	1
16	rs1529916	0.238	0.238	1	1	1	1	1	1
20	rs2762939	0.2388	0.2388	1	1	1	1	1	1
17	rs983085	0.2424	0.2424	1	1	1	1	1	1
8	rs6470494	0.2474	0.2474	1	1	1	1	1	1
11	rs7931342	0.2901	0.2901	1	1	1	1	1	1
19	rs887391	0.2918	0.2918	1	1	1	1	1	1
11	rs1001179	0.2929	0.2929	1	1	1	1	1	1
11	rs11228565	0.3092	0.3092	1	1	1	1	1	1
19	rs1506684	0.3093	0.3093	1	1	1	1	1	1
17	rs799923	0.3331	0.3331	1	1	1	1	1	1
12	rs2071358	0.3609	0.3609	1	1	1	1	1	1
4	rs12500426	0.3735	0.3735	1	1	1	1	1	1
11	rs7127900	0.3788	0.3788	1	1	1	1	1	1
19	rs2659122	0.3896	0.3896	1	1	1	1	1	1
17	rs4794758	0.3918	0.3918	1	1	1	1	1	1
17	rs1859962	0.3965	0.3965	1	1	1	1	1	1
4	rs17021918	0.4083	0.4083	1	1	1	1	1	1
5	rs2242652	0.4113	0.4113	1	1	1	1	1	1
5	rs2121875	0.4134	0.4134	1	1	1	1	1	1
3	rs1050450	0.4155	0.4155	1	1	1	1	1	1
5	rs3733890	0.4669	0.4669	1	1	1	1	1	1
12	rs7299460	0.4705	0.4705	1	1	1	1	1	1
8	rs2928679	0.4841	0.4841	1	1	1	1	1	1
11	rs174448	0.4992	0.4992	1	1	1	1	1	1
4	rs7679673	0.5261	0.5261	1	1	1	1	1	1
17	rs1016990	0.5407	0.5407	1	1	1	1	1	1
12	rs3782905	0.5618	0.5618	1	1	1	1	1	1
17	rs1127678	0.5726	0.5726	1	1	1	1	1	1
3	rs6763931	0.5825	0.5825	1	1	1	1	1	1
2	rs2710647	0.6153	0.6153	1	1	1	1	1	1
20	rs2296241	0.6349	0.6349	1	1	1	1	1	1
1	rs1380576	0.637	0.637	1	1	1	1	1	1
8	rs13254738	0.6676	0.6676	1	1	1	1	1	1
7	rs12155172	0.6682	0.6682	1	1	1	1	1	1
10	rs12529	0.6771	0.6771	1	1	1	1	1	1
3	rs4135275	0.6781	0.6781	1	1	1	1	1	1
17	rs6502051	0.6791	0.6791	1	1	1	1	1	1
1	rs12042763	0.6859	0.6859	1	1	1	1	1	1
4	rs629242	0.6861	0.6861	1	1	1	1	1	1
7	rs10486567	0.6946	0.6946	1	1	1	1	1	1
12	rs10875943	0.698	0.698	1	1	1	1	1	1
5	rs3877899	0.726	0.726	1	1	1	1	1	1
17	rs11545302	0.7361	0.7361	1	1	1	1	1	1
2	rs10187424	0.7483	0.7483	1	1	1	1	1	1
10	rs6162	0.7543	0.7543	1	1	1	1	1	1
10	rs7920517	0.7559	0.7559	1	1	1	1	1	1
8	rs1512268	0.7811	0.7811	1	1	1	1	1	1
8	rs7000448	0.7818	0.7818	1	1	1	1	1	1
3	rs1799977	0.7876	0.7876	1	1	1	1	1	1
7	rs6465657	0.7902	0.7902	1	1	1	1	1	1
19	rs8102476	0.7902	0.7902	1	1	1	1	1	1
12	rs902774	0.8039	0.8039	1	1	1	1	1	1
3	rs10934853	0.8047	0.8047	1	1	1	1	1	1
6	rs4880	0.8074	0.8074	1	1	1	1	1	1
12	rs6823	0.812	0.812	1	1	1	1	1	1
12	rs2279744	0.8231	0.8231	1	1	1	1	1	1
12	rs2946834	0.829	0.829	1	1	1	1	1	1
8	rs6470517	0.8307	0.8307	1	1	1	1	1	1
1	rs5845	0.8312	0.8312	1	1	1	1	1	1
2	rs1465618	0.8332	0.8332	1	1	1	1	1	1
17	rs3094509	0.8347	0.8347	1	1	1	1	1	1
8	rs16902094	0.8576	0.8576	1	1	1	1	1	1
20	rs3787268	0.8949	0.8949	1	1	1	1	1	1
17	rs4054823	0.8988	0.8988	1	1	1	1	1	1
19	rs2659056	0.9595	0.9595	1	1	1	1	1	1
2	rs2292884	0.9975	0.9975	1	1	1	1	1	1
8	rs1016343	0.9977	0.9977	1	1	1	1	1	1
2	rs721048	0.9979	0.9979	1	1	1	1	1	1
9	rs11536889	0.9985	0.9985	1	1	1	1	1	1
11	rs2727270	0.9989	0.9989	1	1	1	1	1	1
15	rs28665122	0.9991	0.9991	1	1	1	1	1	1
3	rs17793693	0.9993	0.9993	1	1	1	1	1	1
2	rs1056827	0.9993	0.9993	1	1	1	1	1	1
19	rs17632542	0.9993	0.9993	1	1	1	1	1	1
20	rs3787557	0.9993	0.9993	1	1	1	1	1	1
17	rs17552022	0.9993	0.9993	1	1	1	1	1	1
2	rs12621278	0.9994	0.9994	1	1	1	1	1	1
8	rs6983561	0.9994	0.9994	1	1	1	1	1	1
23	rs5919432	1	1	1	1	1	1	1	1
23	rs5945619	1	1	1	1	1	1	1	1
12	rs7965399	1	1	1	1	1	1	1	1
8	rs1378897	1	1	1	1	1	1	1	1

## Sheet: Agg_vs_NAgg_OR
CHR	SNP	BP	A1	TEST	NMISS	OR	SE	L95	U95	STAT	P
1	rs5845	86863156	2	ADD	194	1.08	0.3599	0.5333	2.186	0.2132	0.8312
1	rs5845	86863156	2	DOMDEV	194	0.949	0.4534	0.3902	2.308	-0.1155	0.908
1	rs5845	86863156	2	C2	194	1.486	0.4599	0.6033	3.66	0.8611	0.3892
1	rs5845	86863156	2	C3	194	1.345	0.3466	0.6821	2.654	0.8561	0.3919
1	rs5845	86863156	2	C4	194	0.8754	0.3425	0.4473	1.713	-0.3886	0.6975
1	rs5845	86863156	2	GENO_2DF	194	NA	NA	NA	NA	0.04608	0.9772
1	rs12042763	186682744	2	ADD	233	0.8494	0.4038	0.3849	1.874	-0.4044	0.6859
1	rs12042763	186682744	2	DOMDEV	233	1.494	0.4731	0.5911	3.776	0.8487	0.3961
1	rs12042763	186682744	2	C2	233	1.55	0.4495	0.6421	3.74	0.9746	0.3298
1	rs12042763	186682744	2	C3	233	1.157	0.3219	0.6156	2.174	0.4528	0.6507
1	rs12042763	186682744	2	C4	233	0.7808	0.3214	0.4158	1.466	-0.7697	0.4415
1	rs12042763	186682744	2	GENO_2DF	233	NA	NA	NA	NA	0.8154	0.6652
1	rs1380576	204519150	4	ADD	86	1.192	0.3717	0.5751	2.47	0.4719	0.637
1	rs1380576	204519150	4	DOMDEV	86	0.738	0.5513	0.2505	2.174	-0.5511	0.5816
1	rs1380576	204519150	4	C2	86	1.538	0.6362	0.4421	5.353	0.677	0.4984
1	rs1380576	204519150	4	C3	86	1.728	0.5155	0.629	4.745	1.061	0.2888
1	rs1380576	204519150	4	C4	86	1.324	0.5988	0.4094	4.281	0.4684	0.6395
1	rs1380576	204519150	4	GENO_2DF	86	NA	NA	NA	NA	0.4111	0.8142
2	rs632148	31580962	4	ADD	196	2.144	0.3034	1.183	3.886	2.513	0.01196
2	rs632148	31580962	4	DOMDEV	196	0.7395	0.3903	0.3441	1.589	-0.7732	0.4394
2	rs632148	31580962	4	C2	196	1.501	0.4673	0.6008	3.751	0.8695	0.3846
2	rs632148	31580962	4	C3	196	1.265	0.3507	0.6365	2.516	0.6714	0.5019
2	rs632148	31580962	4	C4	196	0.8071	0.3462	0.4095	1.591	-0.6191	0.5359
2	rs632148	31580962	4	GENO_2DF	196	NA	NA	NA	NA	6.545	0.03792
2	rs1056827	38075034	2	ADD	30	4.03e-005	1.219e+004	0	inf	-0.0008302	0.9993
2	rs1056827	38075034	2	DOMDEV	30	3.037e+004	1.219e+004	0	inf	0.0008467	0.9993
2	rs1056827	38075034	2	C2	30	4.508	1.175	0.4509	45.07	1.282	0.1999
2	rs1056827	38075034	2	C3	30	2.19	0.9015	0.3742	12.82	0.8695	0.3846
2	rs1056827	38075034	2	C4	30	1.642	0.9867	0.2374	11.35	0.5024	0.6154
2	rs1056827	38075034	2	GENO_2DF	30	NA	NA	NA	NA	0.04838	0.9761
2	rs1465618	43326810	1	ADD	243	1.092	0.419	0.4805	2.483	0.2106	0.8332
2	rs1465618	43326810	1	DOMDEV	243	1.332	0.4855	0.5141	3.449	0.5897	0.5554
2	rs1465618	43326810	1	C2	243	1.501	0.4496	0.6217	3.623	0.903	0.3665
2	rs1465618	43326810	1	C3	243	1.292	0.3145	0.6974	2.393	0.8144	0.4154
2	rs1465618	43326810	1	C4	243	0.8194	0.3137	0.443	1.515	-0.635	0.5254
2	rs1465618	43326810	1	GENO_2DF	243	NA	NA	NA	NA	1.373	0.5033
2	rs721048	62904596	1	ADD	250	4.681e-005	3847	0	inf	-0.002591	0.9979
2	rs721048	62904596	1	DOMDEV	250	2.548e+004	3847	0	inf	0.002637	0.9979
2	rs721048	62904596	1	C2	250	1.397	0.4267	0.6052	3.224	0.7832	0.4335
2	rs721048	62904596	1	C3	250	1.169	0.3101	0.6366	2.147	0.5038	0.6144
2	rs721048	62904596	1	C4	250	0.8554	0.3082	0.4676	1.565	-0.5068	0.6123
2	rs721048	62904596	1	GENO_2DF	250	NA	NA	NA	NA	0.3062	0.858
2	rs2710647	63213970	2	ADD	241	1.118	0.2223	0.7232	1.729	0.5025	0.6153
2	rs2710647	63213970	2	DOMDEV	241	0.9291	0.3089	0.5072	1.702	-0.2382	0.8117
2	rs2710647	63213970	2	C2	241	1.412	0.4274	0.6108	3.262	0.8065	0.42
2	rs2710647	63213970	2	C3	241	1.199	0.3116	0.6512	2.209	0.5833	0.5597
2	rs2710647	63213970	2	C4	241	0.8124	0.3106	0.4419	1.493	-0.669	0.5035
2	rs2710647	63213970	2	GENO_2DF	241	NA	NA	NA	NA	0.2845	0.8674
2	rs10187424	85567174	4	ADD	242	1.075	0.2251	0.6914	1.671	0.3209	0.7483
2	rs10187424	85567174	4	DOMDEV	242	0.591	0.325	0.3126	1.117	-1.618	0.1056
2	rs10187424	85567174	4	C2	242	1.316	0.4418	0.5536	3.129	0.6218	0.5341
2	rs10187424	85567174	4	C3	242	1.232	0.3172	0.6614	2.294	0.6569	0.5112
2	rs10187424	85567174	4	C4	242	0.8301	0.3132	0.4493	1.534	-0.5946	0.5521
2	rs10187424	85567174	4	GENO_2DF	242	NA	NA	NA	NA	2.627	0.2689
2	rs12621278	172446825	3	ADD	85	5.016e-005	1.219e+004	0	inf	-0.0008122	0.9994
2	rs12621278	172446825	3	DOMDEV	85	1.079e+004	1.219e+004	0	inf	0.0007618	0.9994
2	rs12621278	172446825	3	C2	85	2.113	0.6943	0.5418	8.238	1.077	0.2814
2	rs12621278	172446825	3	C3	85	1.334	0.5038	0.4968	3.58	0.5715	0.5677
2	rs12621278	172446825	3	C4	85	0.9606	0.5712	0.3135	2.943	-0.07046	0.9438
2	rs12621278	172446825	3	GENO_2DF	85	NA	NA	NA	NA	0.5352	0.7652
2	rs2292884	238443226	3	ADD	245	3.829e-005	3252	0	inf	-0.003127	0.9975
2	rs2292884	238443226	3	DOMDEV	245	1.757e+004	3252	0	inf	0.003005	0.9976
2	rs2292884	238443226	3	C2	245	1.483	0.4301	0.6381	3.445	0.9156	0.3599
2	rs2292884	238443226	3	C3	245	1.188	0.3135	0.6424	2.195	0.5482	0.5835
2	rs2292884	238443226	3	C4	245	0.8071	0.3133	0.4367	1.491	-0.6842	0.4939
2	rs2292884	238443226	3	GENO_2DF	245	NA	NA	NA	NA	1.561	0.4582
3	rs17793693	12345971	1	ADD	190	7.467e+004	1.219e+004	0	inf	0.0009206	0.9993
3	rs17793693	12345971	1	DOMDEV	190	1.624e-005	1.219e+004	0	inf	-0.0009047	0.9993
3	rs17793693	12345971	1	C2	190	1.498	0.461	0.607	3.698	0.877	0.3805
3	rs17793693	12345971	1	C3	190	0.9237	0.3513	0.464	1.839	-0.226	0.8212
3	rs17793693	12345971	1	C4	190	0.8276	0.3536	0.4138	1.655	-0.5351	0.5926
3	rs17793693	12345971	1	GENO_2DF	190	NA	NA	NA	NA	0.05054	0.975
3	rs4135275	12443844	3	ADD	235	1.197	0.4332	0.5121	2.798	0.4151	0.6781
3	rs4135275	12443844	3	DOMDEV	235	0.9871	0.5093	0.3638	2.678	-0.02554	0.9796
3	rs4135275	12443844	3	C2	235	1.587	0.4488	0.6586	3.825	1.029	0.3033
3	rs4135275	12443844	3	C3	235	1.134	0.3172	0.6092	2.112	0.3972	0.6912
3	rs4135275	12443844	3	C4	235	0.8779	0.3206	0.4683	1.646	-0.4061	0.6847
3	rs4135275	12443844	3	GENO_2DF	235	NA	NA	NA	NA	0.3746	0.8292
3	rs1799977	37012077	3	ADD	246	1.07	0.2498	0.6556	1.745	0.2695	0.7876
3	rs1799977	37012077	3	DOMDEV	246	0.6052	0.3668	0.2949	1.242	-1.369	0.171
3	rs1799977	37012077	3	C2	246	1.373	0.4304	0.5906	3.192	0.7364	0.4615
3	rs1799977	37012077	3	C3	246	1.263	0.3094	0.6889	2.317	0.7555	0.4499
3	rs1799977	37012077	3	C4	246	0.8425	0.3105	0.4584	1.548	-0.5519	0.581
3	rs1799977	37012077	3	GENO_2DF	246	NA	NA	NA	NA	2.019	0.3645
3	rs1050450	49357401	2	ADD	195	1.241	0.2653	0.7379	2.088	0.8143	0.4155
3	rs1050450	49357401	2	DOMDEV	195	0.7567	0.3741	0.3635	1.575	-0.7453	0.4561
3	rs1050450	49357401	2	C2	195	1.438	0.4634	0.5797	3.565	0.7833	0.4334
3	rs1050450	49357401	2	C3	195	1.326	0.3481	0.6701	2.622	0.8097	0.4181
3	rs1050450	49357401	2	C4	195	0.9257	0.3427	0.4729	1.812	-0.2253	0.8217
3	rs1050450	49357401	2	GENO_2DF	195	NA	NA	NA	NA	0.8878	0.6415
3	rs10934853	128319530	1	ADD	235	1.074	0.2869	0.6118	1.884	0.2473	0.8047
3	rs10934853	128319530	1	DOMDEV	235	0.4938	0.4094	0.2213	1.102	-1.723	0.08481
3	rs10934853	128319530	1	C2	235	1.659	0.4544	0.681	4.043	1.115	0.2651
3	rs10934853	128319530	1	C3	235	1.114	0.3203	0.5946	2.087	0.3367	0.7363
3	rs10934853	128319530	1	C4	235	0.8941	0.3237	0.4741	1.686	-0.3456	0.7296
3	rs10934853	128319530	1	GENO_2DF	235	NA	NA	NA	NA	3.544	0.17
3	rs6763931	141383991	1	ADD	246	1.133	0.2269	0.7262	1.767	0.5498	0.5825
3	rs6763931	141383991	1	DOMDEV	246	1.497	0.3089	0.8171	2.743	1.306	0.1915
3	rs6763931	141383991	1	C2	246	1.383	0.4278	0.5982	3.2	0.7588	0.448
3	rs6763931	141383991	1	C3	246	1.238	0.312	0.6717	2.282	0.6844	0.4937
3	rs6763931	141383991	1	C4	246	0.8362	0.3091	0.4562	1.533	-0.5786	0.5629
3	rs6763931	141383991	1	GENO_2DF	246	NA	NA	NA	NA	2.178	0.3366
4	rs629242	56276871	2	ADD	242	1.163	0.3738	0.559	2.42	0.4042	0.6861
4	rs629242	56276871	2	DOMDEV	242	0.5979	0.4703	0.2379	1.503	-1.094	0.2741
4	rs629242	56276871	2	C2	242	1.377	0.429	0.5941	3.192	0.7459	0.4557
4	rs629242	56276871	2	C3	242	1.229	0.3113	0.6679	2.263	0.6636	0.507
4	rs629242	56276871	2	C4	242	0.8139	0.3141	0.4398	1.506	-0.6555	0.5122
4	rs629242	56276871	2	GENO_2DF	242	NA	NA	NA	NA	1.434	0.4883
4	rs12500426	94593458	1	ADD	233	1.221	0.2243	0.7867	1.895	0.8899	0.3735
4	rs12500426	94593458	1	DOMDEV	233	1.469	0.3192	0.7857	2.746	1.204	0.2285
4	rs12500426	94593458	1	C2	233	1.52	0.4513	0.6274	3.68	0.9271	0.3539
4	rs12500426	94593458	1	C3	233	1.136	0.3204	0.6061	2.128	0.3972	0.6912
4	rs12500426	94593458	1	C4	233	0.9085	0.3263	0.4793	1.722	-0.2942	0.7686
4	rs12500426	94593458	1	GENO_2DF	233	NA	NA	NA	NA	2.243	0.3258
4	rs17021918	94641726	2	ADD	244	0.7992	0.271	0.4699	1.359	-0.8269	0.4083
4	rs17021918	94641726	2	DOMDEV	244	0.9747	0.3669	0.4748	2.001	-0.06983	0.9443
4	rs17021918	94641726	2	C2	244	1.557	0.4482	0.647	3.749	0.9883	0.323
4	rs17021918	94641726	2	C3	244	1.277	0.3141	0.6902	2.364	0.7792	0.4359
4	rs17021918	94641726	2	C4	244	0.7658	0.3147	0.4133	1.419	-0.8479	0.3965
4	rs17021918	94641726	2	GENO_2DF	244	NA	NA	NA	NA	0.9866	0.6106
4	rs7679673	105140377	1	ADD	231	1.18	0.2611	0.7073	1.969	0.6339	0.5261
4	rs7679673	105140377	1	DOMDEV	231	0.6326	0.3526	0.317	1.263	-1.299	0.1941
4	rs7679673	105140377	1	C2	231	1.566	0.4507	0.6473	3.788	0.9951	0.3197
4	rs7679673	105140377	1	C3	231	1.235	0.324	0.6545	2.331	0.6518	0.5146
4	rs7679673	105140377	1	C4	231	0.9097	0.321	0.4849	1.707	-0.2948	0.7681
4	rs7679673	105140377	1	GENO_2DF	231	NA	NA	NA	NA	1.694	0.4286
5	rs2242652	1279913	2	ADD	246	0.6419	0.5396	0.223	1.848	-0.8215	0.4113
5	rs2242652	1279913	2	DOMDEV	246	1.352	0.6298	0.3935	4.646	0.4789	0.632
5	rs2242652	1279913	2	C2	246	1.342	0.4283	0.5797	3.107	0.6868	0.4922
5	rs2242652	1279913	2	C3	246	1.207	0.3096	0.6578	2.214	0.6072	0.5437
5	rs2242652	1279913	2	C4	246	0.8595	0.3084	0.4696	1.573	-0.4911	0.6234
5	rs2242652	1279913	2	GENO_2DF	246	NA	NA	NA	NA	0.7753	0.6787
5	rs3877899	42801166	1	ADD	195	1.119	0.3196	0.5978	2.093	0.3505	0.726
5	rs3877899	42801166	1	DOMDEV	195	0.9887	0.4308	0.425	2.3	-0.02635	0.979
5	rs3877899	42801166	1	C2	195	1.439	0.4624	0.5812	3.56	0.7865	0.4316
5	rs3877899	42801166	1	C3	195	1.279	0.3472	0.6477	2.526	0.7091	0.4783
5	rs3877899	42801166	1	C4	195	0.8374	0.3401	0.43	1.631	-0.5217	0.6019
5	rs3877899	42801166	1	GENO_2DF	195	NA	NA	NA	NA	0.1638	0.9214
5	rs2121875	44365443	3	ADD	242	0.8209	0.2413	0.5116	1.317	-0.818	0.4134
5	rs2121875	44365443	3	DOMDEV	242	1.353	0.3318	0.7062	2.593	0.9115	0.362
5	rs2121875	44365443	3	C2	242	1.381	0.4289	0.5958	3.201	0.7525	0.4517
5	rs2121875	44365443	3	C3	242	1.204	0.3108	0.6546	2.213	0.5965	0.5508
5	rs2121875	44365443	3	C4	242	0.88	0.3108	0.4786	1.618	-0.4113	0.6808
5	rs2121875	44365443	3	GENO_2DF	242	NA	NA	NA	NA	1.104	0.5758
5	rs3733890	79126136	1	ADD	243	0.7456	0.4035	0.3381	1.644	-0.7275	0.4669
5	rs3733890	79126136	1	DOMDEV	243	1.377	0.4623	0.5565	3.408	0.6921	0.4889
5	rs3733890	79126136	1	C2	243	1.545	0.45	0.6395	3.731	0.9665	0.3338
5	rs3733890	79126136	1	C3	243	1.219	0.3196	0.6515	2.281	0.6195	0.5356
5	rs3733890	79126136	1	C4	243	0.825	0.3105	0.4489	1.516	-0.6193	0.5357
5	rs3733890	79126136	1	GENO_2DF	243	NA	NA	NA	NA	0.581	0.7479
6	rs130067	31150734	4	ADD	243	0.627	0.3903	0.2918	1.347	-1.196	0.2316
6	rs130067	31150734	4	DOMDEV	243	1.004	0.4905	0.384	2.626	0.008345	0.9933
6	rs130067	31150734	4	C2	243	1.27	0.4312	0.5454	2.957	0.5541	0.5795
6	rs130067	31150734	4	C3	243	1.262	0.3142	0.6818	2.336	0.7407	0.4589
6	rs130067	31150734	4	C4	243	0.8419	0.3118	0.457	1.551	-0.552	0.581
6	rs130067	31150734	4	GENO_2DF	243	NA	NA	NA	NA	2.822	0.2439
6	rs4880	159692840	2	ADD	196	0.9441	0.236	0.5945	1.499	-0.2438	0.8074
6	rs4880	159692840	2	DOMDEV	196	0.8671	0.338	0.4471	1.682	-0.4218	0.6731
6	rs4880	159692840	2	C2	196	1.498	0.459	0.6092	3.684	0.8805	0.3786
6	rs4880	159692840	2	C3	196	1.33	0.3439	0.6779	2.61	0.8295	0.4068
6	rs4880	159692840	2	C4	196	0.8621	0.3404	0.4424	1.68	-0.4359	0.6629
6	rs4880	159692840	2	GENO_2DF	196	NA	NA	NA	NA	0.2547	0.8804
7	rs12155172	20954872	1	ADD	232	1.147	0.32	0.6126	2.148	0.4287	0.6682
7	rs12155172	20954872	1	DOMDEV	232	0.5918	0.4414	0.2492	1.406	-1.189	0.2346
7	rs12155172	20954872	1	C2	232	1.483	0.4539	0.6094	3.611	0.8688	0.3849
7	rs12155172	20954872	1	C3	232	1.138	0.3223	0.6049	2.14	0.4	0.6891
7	rs12155172	20954872	1	C4	232	0.8822	0.3222	0.4692	1.659	-0.389	0.6973
7	rs12155172	20954872	1	GENO_2DF	232	NA	NA	NA	NA	1.515	0.4688
7	rs10486567	27936944	1	ADD	238	0.8521	0.4074	0.3834	1.894	-0.3927	0.6946
7	rs10486567	27936944	1	DOMDEV	238	1.201	0.4744	0.4738	3.042	0.3853	0.7
7	rs10486567	27936944	1	C2	238	1.204	0.4331	0.5151	2.813	0.4281	0.6685
7	rs10486567	27936944	1	C3	238	1.361	0.3169	0.7312	2.533	0.972	0.331
7	rs10486567	27936944	1	C4	238	0.8155	0.314	0.4407	1.509	-0.6494	0.5161
7	rs10486567	27936944	1	GENO_2DF	238	NA	NA	NA	NA	0.1738	0.9168
7	rs6465657	98187015	4	ADD	235	1.063	0.2301	0.6773	1.669	0.2661	0.7902
7	rs6465657	98187015	4	DOMDEV	235	0.9782	0.3148	0.5278	1.813	-0.07008	0.9441
7	rs6465657	98187015	4	C2	235	1.582	0.4485	0.6567	3.809	1.022	0.3067
7	rs6465657	98187015	4	C3	235	1.17	0.3187	0.6263	2.184	0.4916	0.623
7	rs6465657	98187015	4	C4	235	0.9197	0.3193	0.4919	1.72	-0.2623	0.7931
7	rs6465657	98187015	4	GENO_2DF	235	NA	NA	NA	NA	0.07467	0.9634
7	rs10244329	128248636	2	ADD	92	2.395	0.3997	1.094	5.242	2.184	0.02893
7	rs10244329	128248636	2	DOMDEV	92	1.294	0.5127	0.4737	3.535	0.5027	0.6152
7	rs10244329	128248636	2	C2	92	1.382	0.6391	0.3948	4.835	0.5059	0.6129
7	rs10244329	128248636	2	C3	92	1.567	0.5001	0.5879	4.175	0.8977	0.3693
7	rs10244329	128248636	2	C4	92	1.229	0.562	0.4085	3.698	0.367	0.7137
7	rs10244329	128248636	2	GENO_2DF	92	NA	NA	NA	NA	4.8	0.0907
7	rs3735035	131195959	2	ADD	232	1.625	0.2311	1.033	2.556	2.101	0.03561
7	rs3735035	131195959	2	DOMDEV	232	0.9928	0.3269	0.5231	1.884	-0.02208	0.9824
7	rs3735035	131195959	2	C2	232	1.424	0.4543	0.5843	3.468	0.7773	0.437
7	rs3735035	131195959	2	C3	232	1.147	0.325	0.6069	2.17	0.4233	0.6721
7	rs3735035	131195959	2	C4	232	0.8853	0.3242	0.469	1.671	-0.3758	0.707
7	rs3735035	131195959	2	GENO_2DF	232	NA	NA	NA	NA	4.568	0.1019
8	rs2928679	23438975	2	ADD	241	0.8445	0.2415	0.5261	1.356	-0.6997	0.4841
8	rs2928679	23438975	2	DOMDEV	241	1.082	0.3282	0.5684	2.058	0.2388	0.8113
8	rs2928679	23438975	2	C2	241	1.571	0.4477	0.6531	3.777	1.008	0.3133
8	rs2928679	23438975	2	C3	241	1.166	0.3173	0.6261	2.172	0.4842	0.6282
8	rs2928679	23438975	2	C4	241	0.7584	0.3198	0.4052	1.419	-0.8649	0.3871
8	rs2928679	23438975	2	GENO_2DF	241	NA	NA	NA	NA	0.4952	0.7807
8	rs1512268	23668950	1	ADD	235	0.9349	0.2423	0.5815	1.503	-0.2779	0.7811
8	rs1512268	23668950	1	DOMDEV	235	1.122	0.3262	0.5917	2.126	0.3516	0.7252
8	rs1512268	23668950	1	C2	235	1.559	0.4488	0.6469	3.758	0.9896	0.3224
8	rs1512268	23668950	1	C3	235	1.192	0.3165	0.641	2.216	0.5545	0.5792
8	rs1512268	23668950	1	C4	235	0.8622	0.3187	0.4617	1.61	-0.4651	0.6418
8	rs1512268	23668950	1	GENO_2DF	235	NA	NA	NA	NA	0.1598	0.9232
8	rs1016343	127081052	2	ADD	225	4.562e-005	3512	0	inf	-0.002846	0.9977
8	rs1016343	127081052	2	DOMDEV	225	2.537e+004	3512	0	inf	0.002887	0.9977
8	rs1016343	127081052	2	C2	225	1.257	0.4616	0.5088	3.108	0.4962	0.6197
8	rs1016343	127081052	2	C3	225	1.159	0.322	0.6163	2.178	0.457	0.6477
8	rs1016343	127081052	2	C4	225	0.9382	0.3251	0.4961	1.774	-0.1963	0.8443
8	rs1016343	127081052	2	GENO_2DF	225	NA	NA	NA	NA	0.1861	0.9112
8	rs13254738	127092098	4	ADD	235	0.8789	0.3005	0.4878	1.584	-0.4295	0.6676
8	rs13254738	127092098	4	DOMDEV	235	1.257	0.3839	0.5924	2.668	0.5963	0.551
8	rs13254738	127092098	4	C2	235	1.574	0.4528	0.6479	3.823	1.001	0.3166
8	rs13254738	127092098	4	C3	235	1.116	0.3188	0.5973	2.084	0.3435	0.7312
8	rs13254738	127092098	4	C4	235	0.888	0.3219	0.4725	1.669	-0.3691	0.7121
8	rs13254738	127092098	4	GENO_2DF	235	NA	NA	NA	NA	0.3704	0.8309
8	rs6983561	127094635	4	ADD	242	5.467e-005	1.219e+004	0	inf	-0.0008052	0.9994
8	rs6983561	127094635	4	DOMDEV	242	1.274e+004	1.219e+004	0	inf	0.0007755	0.9994
8	rs6983561	127094635	4	C2	242	1.285	0.4366	0.5461	3.023	0.5741	0.5659
8	rs6983561	127094635	4	C3	242	1.236	0.3117	0.6711	2.277	0.6802	0.4964
8	rs6983561	127094635	4	C4	242	0.8105	0.3098	0.4416	1.487	-0.6782	0.4976
8	rs6983561	127094635	4	GENO_2DF	242	NA	NA	NA	NA	0.4648	0.7926
8	rs1378897	127110414	1	ADD	242	NA	NA	NA	NA	NA	NA
8	rs1378897	127110414	1	DOMDEV	242	NA	NA	NA	NA	NA	NA
8	rs1378897	127110414	1	C2	242	NA	NA	NA	NA	NA	NA
8	rs1378897	127110414	1	C3	242	NA	NA	NA	NA	NA	NA
8	rs1378897	127110414	1	C4	242	NA	NA	NA	NA	NA	NA
8	rs1378897	127110414	1	GENO_2DF	242	NA	NA	NA	NA	NA	NA
8	rs16902094	127308101	3	ADD	240	1.113	0.5951	0.3466	3.572	0.1795	0.8576
8	rs16902094	127308101	3	DOMDEV	240	1.831	0.6537	0.5086	6.595	0.9257	0.3546
8	rs16902094	127308101	3	C2	240	1.716	0.4546	0.7038	4.182	1.187	0.2351
8	rs16902094	127308101	3	C3	240	1.196	0.32	0.6387	2.24	0.5593	0.5759
8	rs16902094	127308101	3	C4	240	0.8029	0.3195	0.4293	1.502	-0.687	0.4921
8	rs16902094	127308101	3	GENO_2DF	240	NA	NA	NA	NA	4.583	0.1011
8	rs6983267	127401060	2	ADD	244	1.347	0.2035	0.904	2.008	1.464	0.1431
8	rs6983267	127401060	2	DOMDEV	244	0.6185	0.3185	0.3313	1.155	-1.509	0.1314
8	rs6983267	127401060	2	C2	244	1.674	0.4523	0.6898	4.062	1.139	0.2547
8	rs6983267	127401060	2	C3	244	1.206	0.3174	0.6474	2.246	0.5899	0.5553
8	rs6983267	127401060	2	C4	244	0.7859	0.3137	0.425	1.453	-0.7681	0.4424
8	rs6983267	127401060	2	GENO_2DF	244	NA	NA	NA	NA	4.162	0.1248
8	rs7000448	127428925	2	ADD	234	0.9343	0.2455	0.5774	1.512	-0.277	0.7818
8	rs7000448	127428925	2	DOMDEV	234	0.7631	0.35	0.3843	1.515	-0.7725	0.4398
8	rs7000448	127428925	2	C2	234	1.552	0.4497	0.6427	3.746	0.9768	0.3287
8	rs7000448	127428925	2	C3	234	1.133	0.3195	0.6056	2.119	0.3904	0.6962
8	rs7000448	127428925	2	C4	234	0.8824	0.3219	0.4695	1.658	-0.3886	0.6976
8	rs7000448	127428925	2	GENO_2DF	234	NA	NA	NA	NA	0.9871	0.6105
8	rs6470517	127448159	3	ADD	215	1.146	0.6369	0.3288	3.993	0.2138	0.8307
8	rs6470517	127448159	3	DOMDEV	215	0.4867	0.7256	0.1174	2.018	-0.9923	0.3211
8	rs6470517	127448159	3	C2	215	1.574	0.4892	0.6034	4.106	0.9273	0.3538
8	rs6470517	127448159	3	C3	215	1.116	0.3402	0.5728	2.173	0.3218	0.7476
8	rs6470517	127448159	3	C4	215	0.8774	0.348	0.4435	1.736	-0.3759	0.707
8	rs6470517	127448159	3	GENO_2DF	215	NA	NA	NA	NA	2.093	0.3512
8	rs6470494	128087904	2	ADD	239	0.6359	0.3914	0.2953	1.369	-1.157	0.2474
8	rs6470494	128087904	2	DOMDEV	239	1.464	0.459	0.5956	3.601	0.8311	0.4059
8	rs6470494	128087904	2	C2	239	1.5	0.4498	0.6214	3.623	0.9021	0.367
8	rs6470494	128087904	2	C3	239	1.133	0.3171	0.6087	2.11	0.3945	0.6932
8	rs6470494	128087904	2	C4	239	0.8638	0.3194	0.4619	1.615	-0.4586	0.6465
8	rs6470494	128087904	2	GENO_2DF	239	NA	NA	NA	NA	1.338	0.5123
8	rs2294008	142680513	2	ADD	235	1.46	0.234	0.9228	2.309	1.616	0.106
8	rs2294008	142680513	2	DOMDEV	235	1.305	0.3175	0.7003	2.431	0.8379	0.4021
8	rs2294008	142680513	2	C2	235	1.534	0.4563	0.6271	3.75	0.9372	0.3487
8	rs2294008	142680513	2	C3	235	1.316	0.3219	0.7001	2.472	0.8523	0.3941
8	rs2294008	142680513	2	C4	235	0.8599	0.318	0.4611	1.604	-0.4745	0.6351
8	rs2294008	142680513	2	GENO_2DF	235	NA	NA	NA	NA	3.44	0.179
9	rs11536889	117715853	4	ADD	241	4.335e-005	5448	0	inf	-0.001844	0.9985
9	rs11536889	117715853	4	DOMDEV	241	1.118e+004	5448	0	inf	0.001711	0.9986
9	rs11536889	117715853	4	C2	241	1.265	0.4325	0.5418	2.952	0.5428	0.5873
9	rs11536889	117715853	4	C3	241	1.186	0.3132	0.6418	2.191	0.544	0.5864
9	rs11536889	117715853	4	C4	241	0.8536	0.3119	0.4632	1.573	-0.5077	0.6117
9	rs11536889	117715853	4	GENO_2DF	241	NA	NA	NA	NA	3.259	0.196
10	rs12529	5136651	3	ADD	250	1.096	0.2192	0.7129	1.684	0.4164	0.6771
10	rs12529	5136651	3	DOMDEV	250	1.517	0.3095	0.8271	2.782	1.347	0.1781
10	rs12529	5136651	3	C2	250	1.25	0.4298	0.5382	2.902	0.5185	0.6041
10	rs12529	5136651	3	C3	250	1.203	0.3094	0.6562	2.207	0.5986	0.5494
10	rs12529	5136651	3	C4	250	0.8729	0.3071	0.4781	1.594	-0.4427	0.658
10	rs12529	5136651	3	GENO_2DF	250	NA	NA	NA	NA	2.201	0.3327
10	rs10740051	46025670	1	ADD	234	1.459	0.2835	0.8373	2.544	1.334	0.1824
10	rs10740051	46025670	1	DOMDEV	234	0.8003	0.3755	0.3834	1.671	-0.5931	0.5531
10	rs10740051	46025670	1	C2	234	1.47	0.4519	0.6064	3.565	0.8531	0.3936
10	rs10740051	46025670	1	C3	234	1.257	0.3259	0.6634	2.38	0.7011	0.4833
10	rs10740051	46025670	1	C4	234	0.9439	0.3271	0.4972	1.792	-0.1767	0.8598
10	rs10740051	46025670	1	GENO_2DF	234	NA	NA	NA	NA	1.784	0.4098
10	rs7920517	46063201	1	ADD	232	1.067	0.2096	0.7078	1.609	0.3109	0.7559
10	rs7920517	46063201	1	DOMDEV	232	0.7234	0.3182	0.3877	1.35	-1.018	0.3088
10	rs7920517	46063201	1	C2	232	1.523	0.4503	0.6301	3.682	0.9342	0.3502
10	rs7920517	46063201	1	C3	232	1.186	0.318	0.6362	2.212	0.5374	0.591
10	rs7920517	46063201	1	C4	232	0.8387	0.3196	0.4483	1.569	-0.5504	0.582
10	rs7920517	46063201	1	GENO_2DF	232	NA	NA	NA	NA	1.139	0.5658
10	rs6162	102837224	1	ADD	249	1.079	0.2428	0.6704	1.737	0.313	0.7543
10	rs6162	102837224	1	DOMDEV	249	1.3	0.32	0.6944	2.435	0.8203	0.4121
10	rs6162	102837224	1	C2	249	1.387	0.4286	0.5987	3.212	0.7628	0.4456
10	rs6162	102837224	1	C3	249	1.192	0.3088	0.651	2.184	0.57	0.5687
10	rs6162	102837224	1	C4	249	0.8471	0.307	0.4641	1.546	-0.5403	0.589
10	rs6162	102837224	1	GENO_2DF	249	NA	NA	NA	NA	1.025	0.599
10	rs4962416	125008303	4	ADD	245	1.546	0.2593	0.9299	2.569	1.68	0.09301
10	rs4962416	125008303	4	DOMDEV	245	0.344	0.3847	0.1618	0.7311	-2.774	0.005537
10	rs4962416	125008303	4	C2	245	1.428	0.4546	0.586	3.482	0.7842	0.4329
10	rs4962416	125008303	4	C3	245	1.334	0.3201	0.7121	2.498	0.8993	0.3685
10	rs4962416	125008303	4	C4	245	0.7972	0.3162	0.429	1.482	-0.7168	0.4735
10	rs4962416	125008303	4	GENO_2DF	245	NA	NA	NA	NA	7.888	0.01937
11	rs7127900	2212344	1	ADD	241	0.7053	0.3967	0.3241	1.535	-0.8802	0.3788
11	rs7127900	2212344	1	DOMDEV	241	1.282	0.477	0.5034	3.265	0.5208	0.6025
11	rs7127900	2212344	1	C2	241	1.505	0.4488	0.6246	3.628	0.9113	0.3621
11	rs7127900	2212344	1	C3	241	1.12	0.32	0.5981	2.097	0.3539	0.7234
11	rs7127900	2212344	1	C4	241	0.8098	0.3139	0.4377	1.498	-0.6722	0.5015
11	rs7127900	2212344	1	GENO_2DF	241	NA	NA	NA	NA	0.8017	0.6697
11	rs1001179	34438684	2	ADD	196	0.5649	0.543	0.1949	1.637	-1.052	0.2929
11	rs1001179	34438684	2	DOMDEV	196	2.257	0.608	0.6855	7.432	1.339	0.1806
11	rs1001179	34438684	2	C2	196	1.611	0.463	0.6501	3.993	1.03	0.303
11	rs1001179	34438684	2	C3	196	1.445	0.3482	0.7302	2.859	1.057	0.2906
11	rs1001179	34438684	2	C4	196	0.8989	0.3397	0.4619	1.749	-0.3136	0.7538
11	rs1001179	34438684	2	GENO_2DF	196	NA	NA	NA	NA	1.8	0.4065
11	rs2727270	61603237	2	ADD	242	4.584e-005	7037	0	inf	-0.00142	0.9989
11	rs2727270	61603237	2	DOMDEV	242	1.151e+004	7037	0	inf	0.001329	0.9989
11	rs2727270	61603237	2	C2	242	1.298	0.4302	0.5584	3.016	0.6058	0.5447
11	rs2727270	61603237	2	C3	242	1.254	0.3129	0.6792	2.315	0.7236	0.4693
11	rs2727270	61603237	2	C4	242	0.8728	0.3104	0.475	1.604	-0.4381	0.6613
11	rs2727270	61603237	2	GENO_2DF	242	NA	NA	NA	NA	2.288	0.3185
11	rs174448	61872101	4	ADD	247	0.8295	0.2765	0.4825	1.426	-0.6758	0.4992
11	rs174448	61872101	4	DOMDEV	247	1.258	0.3506	0.6326	2.5	0.6539	0.5132
11	rs174448	61872101	4	C2	247	1.268	0.4285	0.5473	2.936	0.5533	0.58
11	rs174448	61872101	4	C3	247	1.31	0.3141	0.7079	2.424	0.86	0.3898
11	rs174448	61872101	4	C4	247	0.7923	0.3097	0.4318	1.454	-0.7517	0.4522
11	rs174448	61872101	4	GENO_2DF	247	NA	NA	NA	NA	0.6015	0.7403
11	rs10896438	69139102	3	ADD	248	0.5866	0.2886	0.3331	1.033	-1.848	0.06459
11	rs10896438	69139102	3	DOMDEV	248	1.782	0.3638	0.8734	3.635	1.588	0.1123
11	rs10896438	69139102	3	C2	248	1.422	0.4293	0.6128	3.298	0.8193	0.4126
11	rs10896438	69139102	3	C3	248	1.211	0.3112	0.6578	2.228	0.6139	0.5393
11	rs10896438	69139102	3	C4	248	0.8724	0.3098	0.4753	1.601	-0.4406	0.6595
11	rs10896438	69139102	3	GENO_2DF	248	NA	NA	NA	NA	3.912	0.1414
11	rs11228565	69211113	1	ADD	244	0.6681	0.3967	0.307	1.454	-1.017	0.3092
11	rs11228565	69211113	1	DOMDEV	244	1.013	0.4874	0.3898	2.634	0.02694	0.9785
11	rs11228565	69211113	1	C2	244	1.536	0.4521	0.6331	3.725	0.9489	0.3427
11	rs11228565	69211113	1	C3	244	1.277	0.3152	0.6887	2.369	0.7767	0.4373
11	rs11228565	69211113	1	C4	244	0.8024	0.3134	0.4341	1.483	-0.7022	0.4826
11	rs11228565	69211113	1	GENO_2DF	244	NA	NA	NA	NA	2.089	0.3519
11	rs7931342	69227030	2	ADD	240	1.298	0.2465	0.8006	2.104	1.058	0.2901
11	rs7931342	69227030	2	DOMDEV	240	1.484	0.3207	0.7917	2.783	1.232	0.2181
11	rs7931342	69227030	2	C2	240	1.551	0.452	0.6394	3.76	0.9706	0.3318
11	rs7931342	69227030	2	C3	240	1.145	0.319	0.6125	2.139	0.4234	0.672
11	rs7931342	69227030	2	C4	240	0.8095	0.3168	0.435	1.506	-0.6671	0.5047
11	rs7931342	69227030	2	GENO_2DF	240	NA	NA	NA	NA	2.877	0.2373
12	rs3782905	47872384	3	ADD	208	1.158	0.2523	0.706	1.898	0.5802	0.5618
12	rs3782905	47872384	3	DOMDEV	208	1.117	0.3631	0.5482	2.276	0.3044	0.7608
12	rs3782905	47872384	3	C2	208	1.445	0.4355	0.6157	3.394	0.8461	0.3975
12	rs3782905	47872384	3	C3	208	1.397	0.3351	0.7244	2.694	0.9978	0.3184
12	rs3782905	47872384	3	C4	208	0.8904	0.3363	0.4606	1.721	-0.345	0.7301
12	rs3782905	47872384	3	GENO_2DF	208	NA	NA	NA	NA	0.6539	0.7211
12	rs7299460	48296268	2	ADD	216	0.8032	0.3037	0.4429	1.456	-0.7217	0.4705
12	rs7299460	48296268	2	DOMDEV	216	0.7834	0.4035	0.3552	1.728	-0.6048	0.5453
12	rs7299460	48296268	2	C2	216	1.691	0.484	0.6548	4.366	1.085	0.2779
12	rs7299460	48296268	2	C3	216	1.382	0.3294	0.7245	2.635	0.9817	0.3262
12	rs7299460	48296268	2	C4	216	0.9395	0.3243	0.4976	1.774	-0.1923	0.8475
12	rs7299460	48296268	2	GENO_2DF	216	NA	NA	NA	NA	2.003	0.3673
12	rs6823	48362412	3	ADD	233	0.9459	0.2338	0.5982	1.496	-0.2378	0.812
12	rs6823	48362412	3	DOMDEV	233	1.071	0.3253	0.5662	2.026	0.2111	0.8328
12	rs6823	48362412	3	C2	233	1.497	0.4514	0.6178	3.625	0.8932	0.3717
12	rs6823	48362412	3	C3	233	1.136	0.319	0.608	2.123	0.4001	0.6891
12	rs6823	48362412	3	C4	233	0.8906	0.3213	0.4745	1.672	-0.3606	0.7184
12	rs6823	48362412	3	GENO_2DF	233	NA	NA	NA	NA	0.08366	0.959
12	rs2071358	48366449	1	ADD	240	1.54	0.4723	0.6101	3.885	0.9137	0.3609
12	rs2071358	48366449	1	DOMDEV	240	0.8003	0.5527	0.2709	2.364	-0.4032	0.6868
12	rs2071358	48366449	1	C2	240	1.328	0.4321	0.5693	3.096	0.656	0.5118
12	rs2071358	48366449	1	C3	240	1.244	0.3144	0.6717	2.304	0.6944	0.4874
12	rs2071358	48366449	1	C4	240	0.8071	0.3113	0.4385	1.486	-0.6884	0.4912
12	rs2071358	48366449	1	GENO_2DF	240	NA	NA	NA	NA	1.123	0.5704
12	rs10875943	49282227	4	ADD	243	0.8885	0.3047	0.489	1.614	-0.388	0.698
12	rs10875943	49282227	4	DOMDEV	243	0.8162	0.3913	0.3791	1.757	-0.5192	0.6036
12	rs10875943	49282227	4	C2	243	1.289	0.431	0.5538	3	0.5889	0.5559
12	rs10875943	49282227	4	C3	243	1.296	0.3142	0.7002	2.399	0.8253	0.4092
12	rs10875943	49282227	4	C4	243	0.8392	0.311	0.4562	1.544	-0.5638	0.5729
12	rs10875943	49282227	4	GENO_2DF	243	NA	NA	NA	NA	1.011	0.6034
12	rs902774	52880120	1	ADD	245	0.8683	0.5685	0.285	2.646	-0.2484	0.8039
12	rs902774	52880120	1	DOMDEV	245	1.05	0.6433	0.2977	3.706	0.07658	0.939
12	rs902774	52880120	1	C2	245	1.54	0.4522	0.6347	3.736	0.9547	0.3397
12	rs902774	52880120	1	C3	245	1.26	0.313	0.6824	2.327	0.7389	0.46
12	rs902774	52880120	1	C4	245	0.8236	0.3101	0.4485	1.512	-0.6261	0.5313
12	rs902774	52880120	1	GENO_2DF	245	NA	NA	NA	NA	0.1178	0.9428
12	rs2279744	68808800	3	ADD	228	0.9436	0.2597	0.5672	1.57	-0.2235	0.8231
12	rs2279744	68808800	3	DOMDEV	228	1.546	0.35	0.7786	3.07	1.245	0.2131
12	rs2279744	68808800	3	C2	228	1.224	0.4343	0.5226	2.868	0.4657	0.6414
12	rs2279744	68808800	3	C3	228	1.257	0.322	0.6687	2.363	0.7103	0.4775
12	rs2279744	68808800	3	C4	228	0.8542	0.3194	0.4568	1.597	-0.4935	0.6217
12	rs2279744	68808800	3	GENO_2DF	228	NA	NA	NA	NA	1.65	0.4383
12	rs2946834	102394036	2	ADD	244	1.063	0.2822	0.6113	1.848	0.2159	0.829
12	rs2946834	102394036	2	DOMDEV	244	0.9778	0.366	0.4772	2.003	-0.06126	0.9511
12	rs2946834	102394036	2	C2	244	1.285	0.4287	0.5545	2.976	0.5842	0.5591
12	rs2946834	102394036	2	C3	244	1.263	0.313	0.6839	2.333	0.7461	0.4556
12	rs2946834	102394036	2	C4	244	0.8199	0.3095	0.447	1.504	-0.6415	0.5212
12	rs2946834	102394036	2	GENO_2DF	244	NA	NA	NA	NA	0.05058	0.975
12	rs7965399	102497908	4	ADD	243	NA	NA	NA	NA	NA	NA
12	rs7965399	102497908	4	DOMDEV	243	NA	NA	NA	NA	NA	NA
12	rs7965399	102497908	4	C2	243	NA	NA	NA	NA	NA	NA
12	rs7965399	102497908	4	C3	243	NA	NA	NA	NA	NA	NA
12	rs7965399	102497908	4	C4	243	NA	NA	NA	NA	NA	NA
12	rs7965399	102497908	4	GENO_2DF	243	NA	NA	NA	NA	NA	NA
15	rs28665122	101277522	1	ADD	191	4.526e-005	8606	0	inf	-0.001162	0.9991
15	rs28665122	101277522	1	DOMDEV	191	3.872e+004	8606	0	inf	0.001228	0.999
15	rs28665122	101277522	1	C2	191	1.725	0.4872	0.6641	4.483	1.12	0.2629
15	rs28665122	101277522	1	C3	191	1.307	0.3515	0.6565	2.604	0.7625	0.4457
15	rs28665122	101277522	1	C4	191	0.959	0.3458	0.4869	1.889	-0.1211	0.9036
15	rs28665122	101277522	1	GENO_2DF	191	NA	NA	NA	NA	1.872	0.3921
15	rs4965373	101812395	1	ADD	196	0.5691	0.3951	0.2623	1.235	-1.427	0.1537
15	rs4965373	101812395	1	DOMDEV	196	1.127	0.4881	0.433	2.934	0.2453	0.8062
15	rs4965373	101812395	1	C2	196	1.548	0.4611	0.6269	3.821	0.9473	0.3435
15	rs4965373	101812395	1	C3	196	1.252	0.3502	0.6302	2.487	0.6415	0.5212
15	rs4965373	101812395	1	C4	196	0.8724	0.3412	0.4469	1.703	-0.4002	0.689
15	rs4965373	101812395	1	GENO_2DF	196	NA	NA	NA	NA	3.063	0.2162
16	rs1529916	8897333	2	ADD	231	0.6296	0.3921	0.2919	1.358	-1.18	0.238
16	rs1529916	8897333	2	DOMDEV	231	1.593	0.4588	0.6481	3.915	1.015	0.3103
16	rs1529916	8897333	2	C2	231	1.527	0.4509	0.6309	3.694	0.9383	0.3481
16	rs1529916	8897333	2	C3	231	1.185	0.3203	0.6324	2.22	0.5293	0.5966
16	rs1529916	8897333	2	C4	231	0.8821	0.3223	0.469	1.659	-0.3893	0.6971
16	rs1529916	8897333	2	GENO_2DF	231	NA	NA	NA	NA	1.451	0.4841
16	rs9939609	53786615	1	ADD	242	1.328	0.2122	0.8764	2.014	1.338	0.1808
16	rs9939609	53786615	1	DOMDEV	242	0.5322	0.3188	0.2849	0.9941	-1.979	0.04786
16	rs9939609	53786615	1	C2	242	1.297	0.4338	0.554	3.034	0.5987	0.5493
16	rs9939609	53786615	1	C3	242	1.265	0.3146	0.683	2.344	0.748	0.4545
16	rs9939609	53786615	1	C4	242	0.804	0.3122	0.436	1.483	-0.6987	0.4847
16	rs9939609	53786615	1	GENO_2DF	242	NA	NA	NA	NA	4.95	0.08417
17	rs11545302	12899963	3	ADD	235	0.9024	0.3048	0.4965	1.64	-0.337	0.7361
17	rs11545302	12899963	3	DOMDEV	235	0.6867	0.3954	0.3164	1.49	-0.9509	0.3417
17	rs11545302	12899963	3	C2	235	1.221	0.4319	0.5239	2.848	0.4632	0.6432
17	rs11545302	12899963	3	C3	235	1.276	0.3201	0.6813	2.389	0.7608	0.4468
17	rs11545302	12899963	3	C4	235	0.8933	0.3173	0.4796	1.664	-0.3556	0.7222
17	rs11545302	12899963	3	GENO_2DF	235	NA	NA	NA	NA	2.068	0.3557
17	rs17552022	12994978	4	ADD	248	4.772e-005	1.219e+004	0	inf	-0.0008163	0.9993
17	rs17552022	12994978	4	DOMDEV	248	1.535e+004	1.219e+004	0	inf	0.0007908	0.9994
17	rs17552022	12994978	4	C2	248	1.322	0.4271	0.5723	3.053	0.6532	0.5136
17	rs17552022	12994978	4	C3	248	1.199	0.3096	0.6536	2.2	0.5866	0.5575
17	rs17552022	12994978	4	C4	248	0.8387	0.3079	0.4587	1.533	-0.5714	0.5677
17	rs17552022	12994978	4	GENO_2DF	248	NA	NA	NA	NA	0.5852	0.7463
17	rs4054823	13721707	4	ADD	242	1.027	0.2119	0.6782	1.556	0.1272	0.8988
17	rs4054823	13721707	4	DOMDEV	242	0.9802	0.3113	0.5325	1.804	-0.0644	0.9487
17	rs4054823	13721707	4	C2	242	1.394	0.4283	0.602	3.227	0.775	0.4383
17	rs4054823	13721707	4	C3	242	1.23	0.3124	0.6667	2.268	0.6622	0.5079
17	rs4054823	13721707	4	C4	242	0.7923	0.3104	0.4312	1.456	-0.7499	0.4533
17	rs4054823	13721707	4	GENO_2DF	242	NA	NA	NA	NA	0.01892	0.9906
17	rs3094509	37702294	2	ADD	245	1.048	0.2269	0.6721	1.636	0.2086	0.8347
17	rs3094509	37702294	2	DOMDEV	245	0.5878	0.3442	0.2994	1.154	-1.544	0.1226
17	rs3094509	37702294	2	C2	245	1.321	0.43	0.5687	3.068	0.6472	0.5175
17	rs3094509	37702294	2	C3	245	1.202	0.311	0.6533	2.211	0.5911	0.5545
17	rs3094509	37702294	2	C4	245	0.8385	0.3117	0.4552	1.545	-0.565	0.5721
17	rs3094509	37702294	2	GENO_2DF	245	NA	NA	NA	NA	2.509	0.2853
17	rs4794758	37720433	2	ADD	248	0.7542	0.3295	0.3954	1.439	-0.8563	0.3918
17	rs4794758	37720433	2	DOMDEV	248	1.073	0.4245	0.4667	2.465	0.165	0.8689
17	rs4794758	37720433	2	C2	248	1.36	0.4268	0.5892	3.139	0.7204	0.4713
17	rs4794758	37720433	2	C3	248	1.23	0.3087	0.6716	2.252	0.6702	0.5027
17	rs4794758	37720433	2	C4	248	0.8872	0.3063	0.4867	1.617	-0.3908	0.6959
17	rs4794758	37720433	2	GENO_2DF	248	NA	NA	NA	NA	0.9874	0.6104
17	rs1016990	37728924	3	ADD	248	1.157	0.2377	0.7258	1.843	0.6117	0.5407
17	rs1016990	37728924	3	DOMDEV	248	0.6906	0.3421	0.3532	1.35	-1.082	0.2792
17	rs1016990	37728924	3	C2	248	1.393	0.4283	0.6017	3.225	0.7738	0.439
17	rs1016990	37728924	3	C3	248	1.205	0.3093	0.6574	2.21	0.6038	0.546
17	rs1016990	37728924	3	C4	248	0.8399	0.3079	0.4593	1.536	-0.5667	0.5709
17	rs1016990	37728924	3	GENO_2DF	248	NA	NA	NA	NA	1.21	0.5462
17	rs799923	41251931	1	ADD	251	0.6839	0.3926	0.3168	1.476	-0.968	0.3331
17	rs799923	41251931	1	DOMDEV	251	1.234	0.4747	0.4866	3.129	0.4429	0.6578
17	rs799923	41251931	1	C2	251	1.382	0.4258	0.5999	3.184	0.7598	0.4474
17	rs799923	41251931	1	C3	251	1.184	0.3092	0.6461	2.171	0.5473	0.5842
17	rs799923	41251931	1	C4	251	0.8276	0.3081	0.4524	1.514	-0.6141	0.5392
17	rs799923	41251931	1	GENO_2DF	251	NA	NA	NA	NA	1.084	0.5816
17	rs983085	69212061	3	ADD	239	0.7709	0.2226	0.4984	1.193	-1.169	0.2424
17	rs983085	69212061	3	DOMDEV	239	0.9612	0.3173	0.516	1.79	-0.1248	0.9007
17	rs983085	69212061	3	C2	239	1.52	0.4496	0.6296	3.669	0.9311	0.3518
17	rs983085	69212061	3	C3	239	1.155	0.3185	0.6188	2.157	0.4531	0.6505
17	rs983085	69212061	3	C4	239	0.8003	0.3134	0.433	1.479	-0.7107	0.4773
17	rs983085	69212061	3	GENO_2DF	239	NA	NA	NA	NA	1.476	0.4781
17	rs1859962	71112612	3	ADD	238	1.206	0.2208	0.7823	1.859	0.8478	0.3965
17	rs1859962	71112612	3	DOMDEV	238	0.7646	0.3152	0.4123	1.418	-0.8514	0.3945
17	rs1859962	71112612	3	C2	238	1.642	0.4513	0.6778	3.976	1.098	0.2721
17	rs1859962	71112612	3	C3	238	1.16	0.3164	0.624	2.156	0.4691	0.639
17	rs1859962	71112612	3	C4	238	0.922	0.3188	0.4936	1.722	-0.2547	0.799
17	rs1859962	71112612	3	GENO_2DF	238	NA	NA	NA	NA	1.46	0.4819
17	rs8066956	80034443	2	ADD	233	1.814	0.3194	0.9699	3.393	1.864	0.06228
17	rs8066956	80034443	2	DOMDEV	233	0.8004	0.4145	0.3552	1.804	-0.5372	0.5911
17	rs8066956	80034443	2	C2	233	1.416	0.4556	0.5798	3.459	0.7638	0.445
17	rs8066956	80034443	2	C3	233	1.301	0.3275	0.6849	2.473	0.8043	0.4212
17	rs8066956	80034443	2	C4	233	0.906	0.3224	0.4816	1.705	-0.3061	0.7596
17	rs8066956	80034443	2	GENO_2DF	233	NA	NA	NA	NA	4.022	0.1338
17	rs6502051	80059332	1	ADD	238	0.9063	0.238	0.5684	1.445	-0.4136	0.6791
17	rs6502051	80059332	1	DOMDEV	238	1.017	0.3285	0.534	1.936	0.05025	0.9599
17	rs6502051	80059332	1	C2	238	1.497	0.4493	0.6206	3.611	0.8981	0.3691
17	rs6502051	80059332	1	C3	238	1.259	0.3189	0.674	2.352	0.7226	0.4699
17	rs6502051	80059332	1	C4	238	0.823	0.3168	0.4424	1.531	-0.6148	0.5387
17	rs6502051	80059332	1	GENO_2DF	238	NA	NA	NA	NA	0.1771	0.9153
17	rs1127678	82101611	1	ADD	85	1.474	0.688	0.3828	5.678	0.5643	0.5726
17	rs1127678	82101611	1	DOMDEV	85	1.045	0.7735	0.2296	4.761	0.05742	0.9542
17	rs1127678	82101611	1	C2	85	2.063	0.7196	0.5036	8.455	1.007	0.3141
17	rs1127678	82101611	1	C3	85	1.737	0.5113	0.6378	4.733	1.08	0.28
17	rs1127678	82101611	1	C4	85	1.232	0.6041	0.377	4.025	0.3452	0.73
17	rs1127678	82101611	1	GENO_2DF	85	NA	NA	NA	NA	0.8304	0.6602
19	rs713041	1106616	2	ADD	196	0.5877	0.2853	0.336	1.028	-1.863	0.06252
19	rs713041	1106616	2	DOMDEV	196	1.331	0.368	0.6469	2.738	0.7765	0.4374
19	rs713041	1106616	2	C2	196	1.556	0.4635	0.6272	3.859	0.9536	0.3403
19	rs713041	1106616	2	C3	196	1.383	0.3477	0.6995	2.733	0.932	0.3513
19	rs713041	1106616	2	C4	196	0.7754	0.3452	0.3941	1.525	-0.737	0.4611
19	rs713041	1106616	2	GENO_2DF	196	NA	NA	NA	NA	3.479	0.1756
19	rs8102476	38244973	2	ADD	242	0.9399	0.233	0.5953	1.484	-0.2661	0.7902
19	rs8102476	38244973	2	DOMDEV	242	1.066	0.3169	0.5727	1.984	0.2012	0.8405
19	rs8102476	38244973	2	C2	242	1.384	0.4285	0.5976	3.205	0.7583	0.4483
19	rs8102476	38244973	2	C3	242	1.228	0.3118	0.6667	2.263	0.6598	0.5094
19	rs8102476	38244973	2	C4	242	0.7956	0.3105	0.4329	1.462	-0.7362	0.4616
19	rs8102476	38244973	2	GENO_2DF	242	NA	NA	NA	NA	0.09171	0.9552
19	rs887391	41479716	4	ADD	240	1.479	0.3713	0.7144	3.063	1.054	0.2918
19	rs887391	41479716	4	DOMDEV	240	1.569	0.4547	0.6434	3.824	0.99	0.3222
19	rs887391	41479716	4	C2	240	1.383	0.4358	0.5887	3.25	0.7445	0.4566
19	rs887391	41479716	4	C3	240	1.397	0.3246	0.7394	2.639	1.03	0.303
19	rs887391	41479716	4	C4	240	0.7783	0.3179	0.4174	1.451	-0.7882	0.4306
19	rs887391	41479716	4	GENO_2DF	240	NA	NA	NA	NA	6.712	0.03487
19	rs2659056	50832687	3	ADD	241	1.016	0.3106	0.5526	1.868	0.05081	0.9595
19	rs2659056	50832687	3	DOMDEV	241	0.6336	0.4138	0.2816	1.426	-1.103	0.2702
19	rs2659056	50832687	3	C2	241	1.428	0.4284	0.6169	3.307	0.8323	0.4052
19	rs2659056	50832687	3	C3	241	1.256	0.3129	0.6801	2.319	0.7279	0.4667
19	rs2659056	50832687	3	C4	241	0.7473	0.3131	0.4045	1.38	-0.9303	0.3522
19	rs2659056	50832687	3	GENO_2DF	241	NA	NA	NA	NA	1.803	0.4061
19	rs17632542	50858501	4	ADD	252	4.113e-005	1.219e+004	0	inf	-0.0008285	0.9993
19	rs17632542	50858501	4	DOMDEV	252	7865	1.219e+004	0	inf	0.0007359	0.9994
19	rs17632542	50858501	4	C2	252	1.397	0.427	0.6049	3.225	0.7825	0.4339
19	rs17632542	50858501	4	C3	252	1.226	0.309	0.6689	2.246	0.6586	0.5101
19	rs17632542	50858501	4	C4	252	0.937	0.3092	0.5112	1.718	-0.2105	0.8333
19	rs17632542	50858501	4	GENO_2DF	252	NA	NA	NA	NA	3.198	0.2021
19	rs1354774	50889862	4	ADD	251	0.7259	0.2675	0.4297	1.226	-1.198	0.231
19	rs1354774	50889862	4	DOMDEV	251	1.493	0.3494	0.7527	2.961	1.147	0.2515
19	rs1354774	50889862	4	C2	251	1.327	0.4272	0.5745	3.066	0.6624	0.5077
19	rs1354774	50889862	4	C3	251	1.25	0.3102	0.6805	2.296	0.7193	0.472
19	rs1354774	50889862	4	C4	251	0.8478	0.3066	0.4649	1.546	-0.5386	0.5901
19	rs1354774	50889862	4	GENO_2DF	251	NA	NA	NA	NA	1.86	0.3946
19	rs2659122	51363026	3	ADD	242	0.7504	0.3338	0.3901	1.444	-0.8603	0.3896
19	rs2659122	51363026	3	DOMDEV	242	0.9235	0.4201	0.4054	2.104	-0.1895	0.8497
19	rs2659122	51363026	3	C2	242	1.43	0.4283	0.6178	3.311	0.8354	0.4035
19	rs2659122	51363026	3	C3	242	1.187	0.3122	0.6436	2.188	0.5482	0.5835
19	rs2659122	51363026	3	C4	242	0.8171	0.3105	0.4446	1.502	-0.6504	0.5154
19	rs2659122	51363026	3	GENO_2DF	242	NA	NA	NA	NA	1.691	0.4294
19	rs1506684	51371419	2	ADD	241	1.247	0.2167	0.8151	1.906	1.017	0.3093
19	rs1506684	51371419	2	DOMDEV	241	1.229	0.3105	0.6689	2.259	0.6651	0.506
19	rs1506684	51371419	2	C2	241	1.497	0.4303	0.6439	3.479	0.9371	0.3487
19	rs1506684	51371419	2	C3	241	1.239	0.3125	0.6716	2.286	0.6859	0.4928
19	rs1506684	51371419	2	C4	241	0.7748	0.3111	0.4211	1.426	-0.8202	0.4121
19	rs1506684	51371419	2	GENO_2DF	241	NA	NA	NA	NA	1.592	0.4512
20	rs3918256	44640959	3	ADD	246	0.5339	0.2911	0.3018	0.9445	-2.156	0.03109
20	rs3918256	44640959	3	DOMDEV	246	1.848	0.3616	0.9096	3.754	1.698	0.08953
20	rs3918256	44640959	3	C2	246	1.19	0.4357	0.5068	2.796	0.4001	0.6891
20	rs3918256	44640959	3	C3	246	1.255	0.3135	0.6789	2.32	0.7244	0.4688
20	rs3918256	44640959	3	C4	246	0.8329	0.3126	0.4513	1.537	-0.585	0.5586
20	rs3918256	44640959	3	GENO_2DF	246	NA	NA	NA	NA	5.119	0.07733
20	rs3787268	46013092	1	ADD	118	0.9443	0.4339	0.4035	2.21	-0.1321	0.8949
20	rs3787268	46013092	1	DOMDEV	118	0.8482	0.6363	0.2437	2.952	-0.2588	0.7958
20	rs3787268	46013092	1	C2	118	3.299	0.7865	0.7063	15.41	1.518	0.1291
20	rs3787268	46013092	1	C3	118	1.303	0.4514	0.538	3.157	0.5868	0.5574
20	rs3787268	46013092	1	C4	118	1.298	0.5025	0.4846	3.474	0.5184	0.6042
20	rs3787268	46013092	1	GENO_2DF	118	NA	NA	NA	NA	0.1745	0.9164
20	rs3787557	52783135	4	ADD	242	4.268e-005	1.219e+004	0	inf	-0.0008255	0.9993
20	rs3787557	52783135	4	DOMDEV	242	2.079e+004	1.219e+004	0	inf	0.0008157	0.9993
20	rs3787557	52783135	4	C2	242	1.397	0.4272	0.6046	3.227	0.7821	0.4341
20	rs3787557	52783135	4	C3	242	1.209	0.3105	0.6581	2.223	0.6124	0.5403
20	rs3787557	52783135	4	C4	242	0.7874	0.3094	0.4294	1.444	-0.7728	0.4396
20	rs3787557	52783135	4	GENO_2DF	242	NA	NA	NA	NA	0.1104	0.9463
20	rs2762939	54164712	4	ADD	248	0.5347	0.5313	0.1887	1.515	-1.178	0.2388
20	rs2762939	54164712	4	DOMDEV	248	1.827	0.5849	0.5808	5.75	1.031	0.3026
20	rs2762939	54164712	4	C2	248	1.505	0.4499	0.6233	3.635	0.9091	0.3633
20	rs2762939	54164712	4	C3	248	1.264	0.3136	0.6837	2.338	0.7478	0.4546
20	rs2762939	54164712	4	C4	248	0.8343	0.3102	0.4542	1.533	-0.5838	0.5594
20	rs2762939	54164712	4	GENO_2DF	248	NA	NA	NA	NA	1.393	0.4984
20	rs2296241	54169680	3	ADD	240	1.115	0.2288	0.7119	1.746	0.4748	0.6349
20	rs2296241	54169680	3	DOMDEV	240	1.22	0.3113	0.6626	2.245	0.6377	0.5237
20	rs2296241	54169680	3	C2	240	1.573	0.4485	0.6532	3.79	1.01	0.3123
20	rs2296241	54169680	3	C3	240	1.167	0.3191	0.6242	2.18	0.483	0.6291
20	rs2296241	54169680	3	C4	240	0.8097	0.3139	0.4376	1.498	-0.6724	0.5013
20	rs2296241	54169680	3	GENO_2DF	240	NA	NA	NA	NA	0.6243	0.7319
23	rs5945619	51498820	4	ADD	242	NA	NA	NA	NA	NA	NA
23	rs5945619	51498820	4	DOMDEV	242	NA	NA	NA	NA	NA	NA
23	rs5945619	51498820	4	C2	242	NA	NA	NA	NA	NA	NA
23	rs5945619	51498820	4	C3	242	NA	NA	NA	NA	NA	NA
23	rs5945619	51498820	4	C4	242	NA	NA	NA	NA	NA	NA
23	rs5945619	51498820	4	GENO_2DF	242	NA	NA	NA	NA	NA	NA
23	rs5919432	67801708	4	ADD	244	NA	NA	NA	NA	NA	NA
23	rs5919432	67801708	4	DOMDEV	244	NA	NA	NA	NA	NA	NA
23	rs5919432	67801708	4	C2	244	NA	NA	NA	NA	NA	NA
23	rs5919432	67801708	4	C3	244	NA	NA	NA	NA	NA	NA
23	rs5919432	67801708	4	C4	244	NA	NA	NA	NA	NA	NA
23	rs5919432	67801708	4	GENO_2DF	244	NA	NA	NA	NA	NA	NA

## Sheet: NAgg_vs_Control_Adjusted
CHR	SNP	UNADJ	GC	BONF	HOLM	SIDAK_SS	SIDAK_SD	FDR_BH	FDR_BY
17	rs4054823	1	1	1	1	1	1	1	1
17	rs17552022	1	1	1	1	1	1	1	1
17	rs11545302	1	1	1	1	1	1	1	1
16	rs9939609	1	1	1	1	1	1	1	1
16	rs1529916	1	1	1	1	1	1	1	1
15	rs4965373	1	1	1	1	1	1	1	1
15	rs28665122	1	1	1	1	1	1	1	1
12	rs7965399	1	1	1	1	1	1	1	1
12	rs2946834	1	1	1	1	1	1	1	1
12	rs2279744	1	1	1	1	1	1	1	1
12	rs902774	1	1	1	1	1	1	1	1
12	rs10875943	1	1	1	1	1	1	1	1
12	rs2071358	1	1	1	1	1	1	1	1
12	rs6823	1	1	1	1	1	1	1	1
12	rs7299460	1	1	1	1	1	1	1	1
12	rs3782905	1	1	1	1	1	1	1	1
11	rs7931342	1	1	1	1	1	1	1	1
11	rs11228565	1	1	1	1	1	1	1	1
11	rs10896438	1	1	1	1	1	1	1	1
11	rs174448	1	1	1	1	1	1	1	1
11	rs2727270	1	1	1	1	1	1	1	1
11	rs1001179	1	1	1	1	1	1	1	1
11	rs7127900	1	1	1	1	1	1	1	1
23	rs5919432	1	1	1	1	1	1	1	1
23	rs5945619	1	1	1	1	1	1	1	1
20	rs2296241	1	1	1	1	1	1	1	1
20	rs2762939	1	1	1	1	1	1	1	1
20	rs3787557	1	1	1	1	1	1	1	1
20	rs3787268	1	1	1	1	1	1	1	1
20	rs3918256	1	1	1	1	1	1	1	1
19	rs1506684	1	1	1	1	1	1	1	1
19	rs2659122	1	1	1	1	1	1	1	1
19	rs1354774	1	1	1	1	1	1	1	1
19	rs17632542	1	1	1	1	1	1	1	1
19	rs2659056	1	1	1	1	1	1	1	1
19	rs887391	1	1	1	1	1	1	1	1
19	rs8102476	1	1	1	1	1	1	1	1
19	rs713041	1	1	1	1	1	1	1	1
17	rs1127678	1	1	1	1	1	1	1	1
17	rs6502051	1	1	1	1	1	1	1	1
17	rs8066956	1	1	1	1	1	1	1	1
17	rs1859962	1	1	1	1	1	1	1	1
17	rs983085	1	1	1	1	1	1	1	1
17	rs799923	1	1	1	1	1	1	1	1
17	rs1016990	1	1	1	1	1	1	1	1
17	rs4794758	1	1	1	1	1	1	1	1
17	rs3094509	1	1	1	1	1	1	1	1
5	rs3733890	1	1	1	1	1	1	1	1
5	rs2121875	1	1	1	1	1	1	1	1
5	rs3877899	1	1	1	1	1	1	1	1
5	rs2242652	1	1	1	1	1	1	1	1
4	rs7679673	1	1	1	1	1	1	1	1
4	rs17021918	1	1	1	1	1	1	1	1
4	rs12500426	1	1	1	1	1	1	1	1
4	rs629242	1	1	1	1	1	1	1	1
3	rs6763931	1	1	1	1	1	1	1	1
3	rs10934853	1	1	1	1	1	1	1	1
3	rs1050450	1	1	1	1	1	1	1	1
3	rs1799977	1	1	1	1	1	1	1	1
3	rs4135275	1	1	1	1	1	1	1	1
3	rs17793693	1	1	1	1	1	1	1	1
2	rs2292884	1	1	1	1	1	1	1	1
2	rs12621278	1	1	1	1	1	1	1	1
2	rs10187424	1	1	1	1	1	1	1	1
2	rs2710647	1	1	1	1	1	1	1	1
2	rs721048	1	1	1	1	1	1	1	1
2	rs1465618	1	1	1	1	1	1	1	1
2	rs1056827	1	1	1	1	1	1	1	1
2	rs632148	1	1	1	1	1	1	1	1
1	rs1380576	1	1	1	1	1	1	1	1
1	rs12042763	1	1	1	1	1	1	1	1
1	rs5845	1	1	1	1	1	1	1	1
10	rs4962416	1	1	1	1	1	1	1	1
10	rs6162	1	1	1	1	1	1	1	1
10	rs7920517	1	1	1	1	1	1	1	1
10	rs10740051	1	1	1	1	1	1	1	1
10	rs12529	1	1	1	1	1	1	1	1
9	rs11536889	1	1	1	1	1	1	1	1
8	rs2294008	1	1	1	1	1	1	1	1
8	rs6470494	1	1	1	1	1	1	1	1
8	rs6470517	1	1	1	1	1	1	1	1
8	rs7000448	1	1	1	1	1	1	1	1
8	rs6983267	1	1	1	1	1	1	1	1
8	rs16902094	1	1	1	1	1	1	1	1
8	rs1378897	1	1	1	1	1	1	1	1
8	rs6983561	1	1	1	1	1	1	1	1
8	rs13254738	1	1	1	1	1	1	1	1
8	rs1016343	1	1	1	1	1	1	1	1
8	rs1512268	1	1	1	1	1	1	1	1
8	rs2928679	1	1	1	1	1	1	1	1
7	rs3735035	1	1	1	1	1	1	1	1
7	rs10244329	1	1	1	1	1	1	1	1
7	rs6465657	1	1	1	1	1	1	1	1
7	rs10486567	1	1	1	1	1	1	1	1
7	rs12155172	1	1	1	1	1	1	1	1
6	rs4880	1	1	1	1	1	1	1	1
6	rs130067	1	1	1	1	1	1	1	1

## Sheet: NAgg_vs_Control_OR
CHR	SNP	BP	A1	TEST	NMISS	OR	SE	L95	U95	STAT	P
1	rs5845	86863156	2	ADD	47	1	7849	0	inf	4.139e-19	1
1	rs5845	86863156	2	DOMDEV	47	1	9672	0	inf	-6.209e-20	1
1	rs5845	86863156	2	C2	47	1	10180	0	inf	1.9e-18	1
1	rs5845	86863156	2	C3	47	1	7453	0	inf	4.1e-19	1
1	rs5845	86863156	2	C4	47	1	7605	0	inf	2.445e-20	1
1	rs5845	86863156	2	GENO_2DF	47	NA	NA	NA	NA	2.321e-37	1
1	rs12042763	186682744	2	ADD	52	1	9684	0	inf	1.481e-18	1
1	rs12042763	186682744	2	DOMDEV	52	1	10720	0	inf	-1.019e-18	1
1	rs12042763	186682744	2	C2	52	1	10590	0	inf	2.7e-18	1
1	rs12042763	186682744	2	C3	52	1	7063	0	inf	8.903e-19	1
1	rs12042763	186682744	2	C4	52	1	7207	0	inf	1.226e-18	1
1	rs12042763	186682744	2	GENO_2DF	52	NA	NA	NA	NA	2.214e-36	1
1	rs1380576	204519150	4	ADD	23	1	7665	0	inf	-1.11e-18	1
1	rs1380576	204519150	4	DOMDEV	23	1	11330	0	inf	-1.385e-19	1
1	rs1380576	204519150	4	C2	23	1	14070	0	inf	-1.241e-18	1
1	rs1380576	204519150	4	C3	23	1	10980	0	inf	-7.243e-19	1
1	rs1380576	204519150	4	C4	23	1	12820	0	inf	-1.526e-18	1
1	rs1380576	204519150	4	GENO_2DF	23	NA	NA	NA	NA	1.433e-36	1
2	rs632148	31580962	4	ADD	47	1	5512	0	inf	2.08e-18	1
2	rs632148	31580962	4	DOMDEV	47	1	7702	0	inf	-8.4e-19	1
2	rs632148	31580962	4	C2	47	1	10360	0	inf	-4.361e-19	1
2	rs632148	31580962	4	C3	47	1	7475	0	inf	-2.47e-18	1
2	rs632148	31580962	4	C4	47	1	7268	0	inf	-1.894e-18	1
2	rs632148	31580962	4	GENO_2DF	47	NA	NA	NA	NA	4.401e-36	1
2	rs1056827	38075034	2	ADD	8	NA	NA	NA	NA	NA	NA
2	rs1056827	38075034	2	DOMDEV	8	NA	NA	NA	NA	NA	NA
2	rs1056827	38075034	2	C2	8	NA	NA	NA	NA	NA	NA
2	rs1056827	38075034	2	C3	8	NA	NA	NA	NA	NA	NA
2	rs1056827	38075034	2	C4	8	NA	NA	NA	NA	NA	NA
2	rs1056827	38075034	2	GENO_2DF	8	NA	NA	NA	NA	NA	NA
2	rs1465618	43326810	1	ADD	55	1	9348	0	inf	1.633e-18	1
2	rs1465618	43326810	1	DOMDEV	55	1	10550	0	inf	-1.113e-19	1
2	rs1465618	43326810	1	C2	55	1	10220	0	inf	3.366e-18	1
2	rs1465618	43326810	1	C3	55	1	6804	0	inf	3.783e-19	1
2	rs1465618	43326810	1	C4	55	1	7299	0	inf	1.329e-18	1
2	rs1465618	43326810	1	GENO_2DF	55	NA	NA	NA	NA	5.143e-36	1
2	rs721048	62904596	1	ADD	57	NA	NA	NA	NA	NA	NA
2	rs721048	62904596	1	DOMDEV	57	NA	NA	NA	NA	NA	NA
2	rs721048	62904596	1	C2	57	NA	NA	NA	NA	NA	NA
2	rs721048	62904596	1	C3	57	NA	NA	NA	NA	NA	NA
2	rs721048	62904596	1	C4	57	NA	NA	NA	NA	NA	NA
2	rs721048	62904596	1	GENO_2DF	57	NA	NA	NA	NA	NA	NA
2	rs2710647	63213970	2	ADD	56	1	4685	0	inf	8.293e-19	1
2	rs2710647	63213970	2	DOMDEV	56	1	6744	0	inf	4.203e-19	1
2	rs2710647	63213970	2	C2	56	1	9629	0	inf	1.564e-18	1
2	rs2710647	63213970	2	C3	56	1	6674	0	inf	3.543e-19	1
2	rs2710647	63213970	2	C4	56	1	6699	0	inf	1.39e-18	1
2	rs2710647	63213970	2	GENO_2DF	56	NA	NA	NA	NA	9.491e-37	1
2	rs10187424	85567174	4	ADD	55	1	5357	0	inf	-3.467e-18	1
2	rs10187424	85567174	4	DOMDEV	55	1	7040	0	inf	5.199e-19	1
2	rs10187424	85567174	4	C2	55	1	10770	0	inf	-3.152e-18	1
2	rs10187424	85567174	4	C3	55	1	6913	0	inf	-6.204e-20	1
2	rs10187424	85567174	4	C4	55	1	6899	0	inf	-4.952e-19	1
2	rs10187424	85567174	4	GENO_2DF	55	NA	NA	NA	NA	1.221e-35	1
2	rs12621278	172446825	3	ADD	22	NA	NA	NA	NA	NA	NA
2	rs12621278	172446825	3	DOMDEV	22	NA	NA	NA	NA	NA	NA
2	rs12621278	172446825	3	C2	22	NA	NA	NA	NA	NA	NA
2	rs12621278	172446825	3	C3	22	NA	NA	NA	NA	NA	NA
2	rs12621278	172446825	3	C4	22	NA	NA	NA	NA	NA	NA
2	rs12621278	172446825	3	GENO_2DF	22	NA	NA	NA	NA	NA	NA
2	rs2292884	238443226	3	ADD	56	NA	NA	NA	NA	NA	NA
2	rs2292884	238443226	3	DOMDEV	56	NA	NA	NA	NA	NA	NA
2	rs2292884	238443226	3	C2	56	NA	NA	NA	NA	NA	NA
2	rs2292884	238443226	3	C3	56	NA	NA	NA	NA	NA	NA
2	rs2292884	238443226	3	C4	56	NA	NA	NA	NA	NA	NA
2	rs2292884	238443226	3	GENO_2DF	56	NA	NA	NA	NA	NA	NA
3	rs17793693	12345971	1	ADD	45	1	12610	0	inf	1.071e-18	1
3	rs17793693	12345971	1	DOMDEV	45	1	22100	0	inf	-7.731e-19	1
3	rs17793693	12345971	1	C2	45	1	10210	0	inf	3.221e-19	1
3	rs17793693	12345971	1	C3	45	1	7564	0	inf	8.75e-20	1
3	rs17793693	12345971	1	C4	45	1	7649	0	inf	-1.165e-18	1
3	rs17793693	12345971	1	GENO_2DF	45	NA	NA	NA	NA	1.2e-36	1
3	rs4135275	12443844	3	ADD	53	1	9106	0	inf	-3.18e-20	1
3	rs4135275	12443844	3	DOMDEV	53	1	11450	0	inf	5.372e-19	1
3	rs4135275	12443844	3	C2	53	1	11000	0	inf	3.304e-18	1
3	rs4135275	12443844	3	C3	53	1	7179	0	inf	3.64e-19	1
3	rs4135275	12443844	3	C4	53	1	7239	0	inf	1.537e-18	1
3	rs4135275	12443844	3	GENO_2DF	53	NA	NA	NA	NA	5.757e-37	1
3	rs1799977	37012077	3	ADD	57	1	5224	0	inf	1.657e-18	1
3	rs1799977	37012077	3	DOMDEV	57	1	7991	0	inf	-3.403e-19	1
3	rs1799977	37012077	3	C2	57	1	9441	0	inf	7.832e-20	1
3	rs1799977	37012077	3	C3	57	1	6825	0	inf	1.474e-18	1
3	rs1799977	37012077	3	C4	57	1	6633	0	inf	5.447e-20	1
3	rs1799977	37012077	3	GENO_2DF	57	NA	NA	NA	NA	2.949e-36	1
3	rs1050450	49357401	2	ADD	46	1	5530	0	inf	-3.723e-19	1
3	rs1050450	49357401	2	DOMDEV	46	1	7930	0	inf	-2.601e-19	1
3	rs1050450	49357401	2	C2	46	1	10270	0	inf	-1.44e-18	1
3	rs1050450	49357401	2	C3	46	1	7398	0	inf	6.754e-20	1
3	rs1050450	49357401	2	C4	46	1	7445	0	inf	-6.526e-19	1
3	rs1050450	49357401	2	GENO_2DF	46	NA	NA	NA	NA	3.196e-37	1
3	rs10934853	128319530	1	ADD	52	1	6108	0	inf	8.9e-19	1
3	rs10934853	128319530	1	DOMDEV	52	1	8939	0	inf	4.577e-19	1
3	rs10934853	128319530	1	C2	52	1	10470	0	inf	-3.352e-18	1
3	rs10934853	128319530	1	C3	52	1	7088	0	inf	-1.259e-18	1
3	rs10934853	128319530	1	C4	52	1	7043	0	inf	-1.646e-18	1
3	rs10934853	128319530	1	GENO_2DF	52	NA	NA	NA	NA	1.904e-36	1
3	rs6763931	141383991	1	ADD	56	1	5220	0	inf	-1.374e-18	1
3	rs6763931	141383991	1	DOMDEV	56	1	6871	0	inf	-1.35e-18	1
3	rs6763931	141383991	1	C2	56	1	9593	0	inf	-1.115e-18	1
3	rs6763931	141383991	1	C3	56	1	7238	0	inf	-2.555e-18	1
3	rs6763931	141383991	1	C4	56	1	6712	0	inf	-1.07e-18	1
3	rs6763931	141383991	1	GENO_2DF	56	NA	NA	NA	NA	3.705e-36	1
4	rs629242	56276871	2	ADD	56	1	7425	0	inf	-8.115e-19	1
4	rs629242	56276871	2	DOMDEV	56	1	9956	0	inf	-1.04e-18	1
4	rs629242	56276871	2	C2	56	1	9569	0	inf	-4.317e-18	1
4	rs629242	56276871	2	C3	56	1	6799	0	inf	-1.082e-18	1
4	rs629242	56276871	2	C4	56	1	6733	0	inf	-2.479e-18	1
4	rs629242	56276871	2	GENO_2DF	56	NA	NA	NA	NA	4.888e-36	1
4	rs12500426	94593458	1	ADD	52	1	5021	0	inf	2.901e-18	1
4	rs12500426	94593458	1	DOMDEV	52	1	6868	0	inf	-1.112e-18	1
4	rs12500426	94593458	1	C2	52	1	10220	0	inf	-8.248e-19	1
4	rs12500426	94593458	1	C3	52	1	7066	0	inf	-2.123e-19	1
4	rs12500426	94593458	1	C4	52	1	7129	0	inf	-8.757e-19	1
4	rs12500426	94593458	1	GENO_2DF	52	NA	NA	NA	NA	1.007e-35	1
4	rs17021918	94641726	2	ADD	55	1	6128	0	inf	3.33e-19	1
4	rs17021918	94641726	2	DOMDEV	55	1	8104	0	inf	-3.478e-20	1
4	rs17021918	94641726	2	C2	55	1	10570	0	inf	2.132e-18	1
4	rs17021918	94641726	2	C3	55	1	6793	0	inf	1.046e-19	1
4	rs17021918	94641726	2	C4	55	1	6951	0	inf	1.037e-19	1
4	rs17021918	94641726	2	GENO_2DF	55	NA	NA	NA	NA	1.284e-37	1
4	rs7679673	105140377	1	ADD	53	1	5833	0	inf	2.646e-19	1
4	rs7679673	105140377	1	DOMDEV	53	1	8126	0	inf	3.181e-19	1
4	rs7679673	105140377	1	C2	53	1	10320	0	inf	-1.606e-18	1
4	rs7679673	105140377	1	C3	53	1	7320	0	inf	-7.994e-19	1
4	rs7679673	105140377	1	C4	53	1	7392	0	inf	-1.256e-18	1
4	rs7679673	105140377	1	GENO_2DF	53	NA	NA	NA	NA	3.389e-37	1
5	rs2242652	1279913	2	ADD	56	1	12570	0	inf	1.133e-18	1
5	rs2242652	1279913	2	DOMDEV	56	1	14410	0	inf	-7.587e-19	1
5	rs2242652	1279913	2	C2	56	1	9668	0	inf	2.239e-18	1
5	rs2242652	1279913	2	C3	56	1	6717	0	inf	2.446e-19	1
5	rs2242652	1279913	2	C4	56	1	6765	0	inf	1.677e-18	1
5	rs2242652	1279913	2	GENO_2DF	56	NA	NA	NA	NA	1.374e-36	1
5	rs3877899	42801166	1	ADD	46	1	6767	0	inf	-1.667e-19	1
5	rs3877899	42801166	1	DOMDEV	46	1	9380	0	inf	1.489e-18	1
5	rs3877899	42801166	1	C2	46	1	10280	0	inf	8.252e-19	1
5	rs3877899	42801166	1	C3	46	1	7679	0	inf	1.426e-18	1
5	rs3877899	42801166	1	C4	46	1	7542	0	inf	2.324e-18	1
5	rs3877899	42801166	1	GENO_2DF	46	NA	NA	NA	NA	2.788e-36	1
5	rs2121875	44365443	3	ADD	56	1	5365	0	inf	-1.015e-18	1
5	rs2121875	44365443	3	DOMDEV	56	1	7286	0	inf	-7.013e-19	1
5	rs2121875	44365443	3	C2	56	1	9598	0	inf	-4.894e-18	1
5	rs2121875	44365443	3	C3	56	1	6747	0	inf	-2.32e-18	1
5	rs2121875	44365443	3	C4	56	1	6696	0	inf	-2.206e-18	1
5	rs2121875	44365443	3	GENO_2DF	56	NA	NA	NA	NA	2.502e-36	1
5	rs3733890	79126136	1	ADD	55	1	9364	0	inf	1.165e-18	1
5	rs3733890	79126136	1	DOMDEV	55	1	10800	0	inf	-5.358e-19	1
5	rs3733890	79126136	1	C2	55	1	9987	0	inf	-1.97e-20	1
5	rs3733890	79126136	1	C3	55	1	6996	0	inf	1.271e-18	1
5	rs3733890	79126136	1	C4	55	1	6813	0	inf	1.725e-18	1
5	rs3733890	79126136	1	GENO_2DF	55	NA	NA	NA	NA	1.721e-36	1
6	rs130067	31150734	4	ADD	55	1	9072	0	inf	1.829e-18	1
6	rs130067	31150734	4	DOMDEV	55	1	11190	0	inf	-1.301e-18	1
6	rs130067	31150734	4	C2	55	1	9564	0	inf	-1.912e-18	1
6	rs130067	31150734	4	C3	55	1	6908	0	inf	6.598e-19	1
6	rs130067	31150734	4	C4	55	1	6899	0	inf	-1.624e-18	1
6	rs130067	31150734	4	GENO_2DF	55	NA	NA	NA	NA	3.347e-36	1
6	rs4880	159692840	2	ADD	47	1	5279	0	inf	-1.806e-18	1
6	rs4880	159692840	2	DOMDEV	47	1	7174	0	inf	2.178e-19	1
6	rs4880	159692840	2	C2	47	1	10190	0	inf	-7.708e-19	1
6	rs4880	159692840	2	C3	47	1	7758	0	inf	-3.183e-19	1
6	rs4880	159692840	2	C4	47	1	7295	0	inf	-6.814e-19	1
6	rs4880	159692840	2	GENO_2DF	47	NA	NA	NA	NA	3.264e-36	1
7	rs12155172	20954872	1	ADD	52	1	7021	0	inf	-1.07e-19	1
7	rs12155172	20954872	1	DOMDEV	52	1	9411	0	inf	5.61e-19	1
7	rs12155172	20954872	1	C2	52	1	10260	0	inf	2.156e-18	1
7	rs12155172	20954872	1	C3	52	1	7050	0	inf	4.415e-19	1
7	rs12155172	20954872	1	C4	52	1	7650	0	inf	7.719e-19	1
7	rs12155172	20954872	1	GENO_2DF	52	NA	NA	NA	NA	3.632e-37	1
7	rs10486567	27936944	1	ADD	54	1	9015	0	inf	4.247e-19	1
7	rs10486567	27936944	1	DOMDEV	54	1	10530	0	inf	-8.488e-19	1
7	rs10486567	27936944	1	C2	54	1	9709	0	inf	-3.369e-18	1
7	rs10486567	27936944	1	C3	54	1	6920	0	inf	2.258e-19	1
7	rs10486567	27936944	1	C4	54	1	6768	0	inf	-1.902e-18	1
7	rs10486567	27936944	1	GENO_2DF	54	NA	NA	NA	NA	8.321e-37	1
7	rs6465657	98187015	4	ADD	53	1	5055	0	inf	2.551e-18	1
7	rs6465657	98187015	4	DOMDEV	53	1	7020	0	inf	-9.401e-20	1
7	rs6465657	98187015	4	C2	53	1	10230	0	inf	8.582e-19	1
7	rs6465657	98187015	4	C3	53	1	7036	0	inf	1.871e-19	1
7	rs6465657	98187015	4	C4	53	1	7256	0	inf	9.461e-19	1
7	rs6465657	98187015	4	GENO_2DF	53	NA	NA	NA	NA	6.511e-36	1
7	rs10244329	128248636	2	ADD	24	1	10380	0	inf	3.82e-19	1
7	rs10244329	128248636	2	DOMDEV	24	1	11290	0	inf	3.994e-19	1
7	rs10244329	128248636	2	C2	24	1	16980	0	inf	-1.563e-19	1
7	rs10244329	128248636	2	C3	24	1	10250	0	inf	-1.946e-20	1
7	rs10244329	128248636	2	C4	24	1	12330	0	inf	9.567e-20	1
7	rs10244329	128248636	2	GENO_2DF	24	NA	NA	NA	NA	2.145e-37	1
7	rs3735035	131195959	2	ADD	52	1	5012	0	inf	-4.102e-20	1
7	rs3735035	131195959	2	DOMDEV	52	1	6995	0	inf	-1.215e-19	1
7	rs3735035	131195959	2	C2	52	1	10260	0	inf	-3.387e-19	1
7	rs3735035	131195959	2	C3	52	1	6895	0	inf	-3.362e-19	1
7	rs3735035	131195959	2	C4	52	1	7041	0	inf	6.149e-19	1
7	rs3735035	131195959	2	GENO_2DF	52	NA	NA	NA	NA	1.491e-38	1
8	rs2928679	23438975	2	ADD	53	1	5456	0	inf	-7.94e-19	1
8	rs2928679	23438975	2	DOMDEV	53	1	7437	0	inf	-5.355e-20	1
8	rs2928679	23438975	2	C2	53	1	10070	0	inf	6.694e-19	1
8	rs2928679	23438975	2	C3	53	1	6876	0	inf	-1.472e-19	1
8	rs2928679	23438975	2	C4	53	1	7277	0	inf	-1.578e-18	1
8	rs2928679	23438975	2	GENO_2DF	53	NA	NA	NA	NA	7.47e-37	1
8	rs1512268	23668950	1	ADD	54	1	5228	0	inf	-2.671e-18	1
8	rs1512268	23668950	1	DOMDEV	54	1	7551	0	inf	-1.407e-18	1
8	rs1512268	23668950	1	C2	54	1	10280	0	inf	-3.563e-18	1
8	rs1512268	23668950	1	C3	54	1	6975	0	inf	6.111e-19	1
8	rs1512268	23668950	1	C4	54	1	7390	0	inf	-1.322e-18	1
8	rs1512268	23668950	1	GENO_2DF	54	NA	NA	NA	NA	1.118e-35	1
8	rs1016343	127081052	2	ADD	52	NA	NA	NA	NA	NA	NA
8	rs1016343	127081052	2	DOMDEV	52	NA	NA	NA	NA	NA	NA
8	rs1016343	127081052	2	C2	52	NA	NA	NA	NA	NA	NA
8	rs1016343	127081052	2	C3	52	NA	NA	NA	NA	NA	NA
8	rs1016343	127081052	2	C4	52	NA	NA	NA	NA	NA	NA
8	rs1016343	127081052	2	GENO_2DF	52	NA	NA	NA	NA	NA	NA
8	rs13254738	127092098	4	ADD	52	1	6746	0	inf	-2.785e-19	1
8	rs13254738	127092098	4	DOMDEV	52	1	8399	0	inf	-4.801e-19	1
8	rs13254738	127092098	4	C2	52	1	10510	0	inf	-1.272e-18	1
8	rs13254738	127092098	4	C3	52	1	7035	0	inf	-3.513e-19	1
8	rs13254738	127092098	4	C4	52	1	7111	0	inf	5.658e-19	1
8	rs13254738	127092098	4	GENO_2DF	52	NA	NA	NA	NA	6.471e-37	1
8	rs6983561	127094635	4	ADD	56	NA	NA	NA	NA	NA	NA
8	rs6983561	127094635	4	DOMDEV	56	NA	NA	NA	NA	NA	NA
8	rs6983561	127094635	4	C2	56	NA	NA	NA	NA	NA	NA
8	rs6983561	127094635	4	C3	56	NA	NA	NA	NA	NA	NA
8	rs6983561	127094635	4	C4	56	NA	NA	NA	NA	NA	NA
8	rs6983561	127094635	4	GENO_2DF	56	NA	NA	NA	NA	NA	NA
8	rs1378897	127110414	1	ADD	56	NA	NA	NA	NA	NA	NA
8	rs1378897	127110414	1	DOMDEV	56	NA	NA	NA	NA	NA	NA
8	rs1378897	127110414	1	C2	56	NA	NA	NA	NA	NA	NA
8	rs1378897	127110414	1	C3	56	NA	NA	NA	NA	NA	NA
8	rs1378897	127110414	1	C4	56	NA	NA	NA	NA	NA	NA
8	rs1378897	127110414	1	GENO_2DF	56	NA	NA	NA	NA	NA	NA
8	rs16902094	127308101	3	ADD	54	1	12700	0	inf	-7.368e-19	1
8	rs16902094	127308101	3	DOMDEV	54	1	13810	0	inf	4.318e-19	1
8	rs16902094	127308101	3	C2	54	1	9988	0	inf	2.545e-18	1
8	rs16902094	127308101	3	C3	54	1	6889	0	inf	2.667e-19	1
8	rs16902094	127308101	3	C4	54	1	6837	0	inf	1.683e-18	1
8	rs16902094	127308101	3	GENO_2DF	54	NA	NA	NA	NA	7.143e-37	1
8	rs6983267	127401060	2	ADD	55	1	4239	0	inf	1.869e-18	1
8	rs6983267	127401060	2	DOMDEV	55	1	6841	0	inf	-1.113e-19	1
8	rs6983267	127401060	2	C2	55	1	10020	0	inf	1.971e-18	1
8	rs6983267	127401060	2	C3	55	1	6764	0	inf	-5.91e-20	1
8	rs6983267	127401060	2	C4	55	1	6736	0	inf	8.945e-19	1
8	rs6983267	127401060	2	GENO_2DF	55	NA	NA	NA	NA	3.506e-36	1
8	rs7000448	127428925	2	ADD	52	1	5571	0	inf	-1.46e-18	1
8	rs7000448	127428925	2	DOMDEV	52	1	8044	0	inf	1.315e-19	1
8	rs7000448	127428925	2	C2	52	1	10680	0	inf	-7.411e-20	1
8	rs7000448	127428925	2	C3	52	1	7194	0	inf	-5e-19	1
8	rs7000448	127428925	2	C4	52	1	7370	0	inf	7.393e-19	1
8	rs7000448	127428925	2	GENO_2DF	52	NA	NA	NA	NA	2.387e-36	1
8	rs6470517	127448159	3	ADD	46	1	12690	0	inf	1.524e-18	1
8	rs6470517	127448159	3	DOMDEV	46	1	15460	0	inf	-5.354e-19	1
8	rs6470517	127448159	3	C2	46	1	11830	0	inf	-3.136e-18	1
8	rs6470517	127448159	3	C3	46	1	7576	0	inf	-4.589e-19	1
8	rs6470517	127448159	3	C4	46	1	8129	0	inf	-1.206e-18	1
8	rs6470517	127448159	3	GENO_2DF	46	NA	NA	NA	NA	3.364e-36	1
8	rs6470494	128087904	2	ADD	53	1	8950	0	inf	-3.049e-19	1
8	rs6470494	128087904	2	DOMDEV	53	1	10340	0	inf	-6.028e-19	1
8	rs6470494	128087904	2	C2	53	1	10250	0	inf	1.613e-18	1
8	rs6470494	128087904	2	C3	53	1	6880	0	inf	-8.252e-19	1
8	rs6470494	128087904	2	C4	53	1	6944	0	inf	7.39e-19	1
8	rs6470494	128087904	2	GENO_2DF	53	NA	NA	NA	NA	1.677e-36	1
8	rs2294008	142680513	2	ADD	53	1	5233	0	inf	-1.288e-18	1
8	rs2294008	142680513	2	DOMDEV	53	1	6960	0	inf	-1.977e-19	1
8	rs2294008	142680513	2	C2	53	1	10040	0	inf	-1.576e-18	1
8	rs2294008	142680513	2	C3	53	1	7113	0	inf	-8.219e-20	1
8	rs2294008	142680513	2	C4	53	1	7027	0	inf	-2.495e-18	1
8	rs2294008	142680513	2	GENO_2DF	53	NA	NA	NA	NA	1.736e-36	1
9	rs11536889	117715853	4	ADD	56	NA	NA	NA	NA	NA	NA
9	rs11536889	117715853	4	DOMDEV	56	NA	NA	NA	NA	NA	NA
9	rs11536889	117715853	4	C2	56	NA	NA	NA	NA	NA	NA
9	rs11536889	117715853	4	C3	56	NA	NA	NA	NA	NA	NA
9	rs11536889	117715853	4	C4	56	NA	NA	NA	NA	NA	NA
9	rs11536889	117715853	4	GENO_2DF	56	NA	NA	NA	NA	NA	NA
10	rs12529	5136651	3	ADD	57	1	4869	0	inf	2.004e-18	1
10	rs12529	5136651	3	DOMDEV	57	1	6875	0	inf	-1.589e-20	1
10	rs12529	5136651	3	C2	57	1	10010	0	inf	3.815e-18	1
10	rs12529	5136651	3	C3	57	1	6614	0	inf	1.234e-18	1
10	rs12529	5136651	3	C4	57	1	6654	0	inf	1.45e-18	1
10	rs12529	5136651	3	GENO_2DF	57	NA	NA	NA	NA	4.04e-36	1
10	rs10740051	46025670	1	ADD	52	1	5865	0	inf	-5.826e-19	1
10	rs10740051	46025670	1	DOMDEV	52	1	8031	0	inf	3.924e-19	1
10	rs10740051	46025670	1	C2	52	1	10780	0	inf	-8.353e-19	1
10	rs10740051	46025670	1	C3	52	1	7023	0	inf	-2.42e-19	1
10	rs10740051	46025670	1	C4	52	1	7352	0	inf	-8.876e-19	1
10	rs10740051	46025670	1	GENO_2DF	52	NA	NA	NA	NA	3.594e-37	1
10	rs7920517	46063201	1	ADD	53	1	4633	0	inf	2.202e-19	1
10	rs7920517	46063201	1	DOMDEV	53	1	6887	0	inf	-1.652e-19	1
10	rs7920517	46063201	1	C2	53	1	10590	0	inf	3.065e-18	1
10	rs7920517	46063201	1	C3	53	1	6989	0	inf	-2.089e-19	1
10	rs7920517	46063201	1	C4	53	1	7001	0	inf	1.26e-18	1
10	rs7920517	46063201	1	GENO_2DF	53	NA	NA	NA	NA	7.728e-38	1
10	rs6162	102837224	1	ADD	57	1	5194	0	inf	1.199e-18	1
10	rs6162	102837224	1	DOMDEV	57	1	6986	0	inf	1.104e-18	1
10	rs6162	102837224	1	C2	57	1	9565	0	inf	3.832e-18	1
10	rs6162	102837224	1	C3	57	1	6657	0	inf	1.785e-18	1
10	rs6162	102837224	1	C4	57	1	6678	0	inf	1.438e-18	1
10	rs6162	102837224	1	GENO_2DF	57	NA	NA	NA	NA	3.66e-36	1
10	rs4962416	125008303	4	ADD	55	1	5107	0	inf	-4.752e-20	1
10	rs4962416	125008303	4	DOMDEV	55	1	8063	0	inf	9.256e-19	1
10	rs4962416	125008303	4	C2	55	1	10060	0	inf	-6.651e-19	1
10	rs4962416	125008303	4	C3	55	1	6823	0	inf	3.803e-19	1
10	rs4962416	125008303	4	C4	55	1	6913	0	inf	-2.942e-19	1
10	rs4962416	125008303	4	GENO_2DF	55	NA	NA	NA	NA	9.663e-37	1
11	rs7127900	2212344	1	ADD	54	1	9160	0	inf	3.804e-20	1
11	rs7127900	2212344	1	DOMDEV	54	1	10790	0	inf	2.445e-19	1
11	rs7127900	2212344	1	C2	54	1	10020	0	inf	-5.271e-19	1
11	rs7127900	2212344	1	C3	54	1	6954	0	inf	7.368e-19	1
11	rs7127900	2212344	1	C4	54	1	6721	0	inf	3.704e-19	1
11	rs7127900	2212344	1	GENO_2DF	54	NA	NA	NA	NA	1.764e-37	1
11	rs1001179	34438684	2	ADD	47	1	12670	0	inf	-8.894e-19	1
11	rs1001179	34438684	2	DOMDEV	47	1	13840	0	inf	1.205e-18	1
11	rs1001179	34438684	2	C2	47	1	10150	0	inf	8.027e-19	1
11	rs1001179	34438684	2	C3	47	1	7418	0	inf	-1.327e-18	1
11	rs1001179	34438684	2	C4	47	1	7310	0	inf	1.144e-19	1
11	rs1001179	34438684	2	GENO_2DF	47	NA	NA	NA	NA	1.52e-36	1
11	rs2727270	61603237	2	ADD	56	NA	NA	NA	NA	NA	NA
11	rs2727270	61603237	2	DOMDEV	56	NA	NA	NA	NA	NA	NA
11	rs2727270	61603237	2	C2	56	NA	NA	NA	NA	NA	NA
11	rs2727270	61603237	2	C3	56	NA	NA	NA	NA	NA	NA
11	rs2727270	61603237	2	C4	56	NA	NA	NA	NA	NA	NA
11	rs2727270	61603237	2	GENO_2DF	56	NA	NA	NA	NA	NA	NA
11	rs174448	61872101	4	ADD	55	1	6343	0	inf	-1.053e-18	1
11	rs174448	61872101	4	DOMDEV	55	1	7898	0	inf	2.132e-19	1
11	rs174448	61872101	4	C2	55	1	9921	0	inf	-3.363e-18	1
11	rs174448	61872101	4	C3	55	1	6841	0	inf	-7.608e-19	1
11	rs174448	61872101	4	C4	55	1	6844	0	inf	-2.571e-18	1
11	rs174448	61872101	4	GENO_2DF	55	NA	NA	NA	NA	1.249e-36	1
11	rs10896438	69139102	3	ADD	57	1	6635	0	inf	-3.63e-19	1
11	rs10896438	69139102	3	DOMDEV	57	1	8166	0	inf	-1.924e-18	1
11	rs10896438	69139102	3	C2	57	1	9556	0	inf	-4.373e-18	1
11	rs10896438	69139102	3	C3	57	1	6633	0	inf	-7.865e-19	1
11	rs10896438	69139102	3	C4	57	1	6761	0	inf	-2.193e-18	1
11	rs10896438	69139102	3	GENO_2DF	57	NA	NA	NA	NA	6.996e-36	1
11	rs11228565	69211113	1	ADD	55	1	9046	0	inf	3.611e-19	1
11	rs11228565	69211113	1	DOMDEV	55	1	11190	0	inf	-7.944e-19	1
11	rs11228565	69211113	1	C2	55	1	10220	0	inf	-2.567e-18	1
11	rs11228565	69211113	1	C3	55	1	6722	0	inf	-2.176e-19	1
11	rs11228565	69211113	1	C4	55	1	6813	0	inf	-1.517e-18	1
11	rs11228565	69211113	1	GENO_2DF	55	NA	NA	NA	NA	7.497e-37	1
11	rs7931342	69227030	2	ADD	54	1	5405	0	inf	9.047e-19	1
11	rs7931342	69227030	2	DOMDEV	54	1	7079	0	inf	1.052e-18	1
11	rs7931342	69227030	2	C2	54	1	10040	0	inf	1.368e-18	1
11	rs7931342	69227030	2	C3	54	1	6814	0	inf	4.823e-19	1
11	rs7931342	69227030	2	C4	54	1	6989	0	inf	2.006e-19	1
11	rs7931342	69227030	2	GENO_2DF	54	NA	NA	NA	NA	2.087e-36	1
12	rs3782905	47872384	3	ADD	49	1	5734	0	inf	-1.633e-18	1
12	rs3782905	47872384	3	DOMDEV	49	1	8183	0	inf	-2.879e-19	1
12	rs3782905	47872384	3	C2	49	1	9914	0	inf	3.178e-21	1
12	rs3782905	47872384	3	C3	49	1	7407	0	inf	-4.173e-19	1
12	rs3782905	47872384	3	C4	49	1	7795	0	inf	4.826e-19	1
12	rs3782905	47872384	3	GENO_2DF	49	NA	NA	NA	NA	3.757e-36	1
12	rs7299460	48296268	2	ADD	52	1	6740	0	inf	2.005e-19	1
12	rs7299460	48296268	2	DOMDEV	52	1	9362	0	inf	-1.436e-18	1
12	rs7299460	48296268	2	C2	52	1	10990	0	inf	-1.313e-18	1
12	rs7299460	48296268	2	C3	52	1	7245	0	inf	-1.157e-18	1
12	rs7299460	48296268	2	C4	52	1	6946	0	inf	-4.486e-19	1
12	rs7299460	48296268	2	GENO_2DF	52	NA	NA	NA	NA	2.754e-36	1
12	rs6823	48362412	3	ADD	52	1	5093	0	inf	1.289e-18	1
12	rs6823	48362412	3	DOMDEV	52	1	7207	0	inf	1.049e-18	1
12	rs6823	48362412	3	C2	52	1	10360	0	inf	3.06e-18	1
12	rs6823	48362412	3	C3	52	1	7117	0	inf	-9.98e-20	1
12	rs6823	48362412	3	C4	52	1	7053	0	inf	1.306e-18	1
12	rs6823	48362412	3	GENO_2DF	52	NA	NA	NA	NA	3.472e-36	1
12	rs2071358	48366449	1	ADD	56	1	9041	0	inf	1.509e-18	1
12	rs2071358	48366449	1	DOMDEV	56	1	11100	0	inf	-1.779e-19	1
12	rs2071358	48366449	1	C2	56	1	9573	0	inf	7.989e-19	1
12	rs2071358	48366449	1	C3	56	1	6784	0	inf	5.366e-19	1
12	rs2071358	48366449	1	C4	56	1	6833	0	inf	8.521e-20	1
12	rs2071358	48366449	1	GENO_2DF	56	NA	NA	NA	NA	4.426e-36	1
12	rs10875943	49282227	4	ADD	55	1	6671	0	inf	-8.021e-19	1
12	rs10875943	49282227	4	DOMDEV	55	1	9094	0	inf	-5.635e-20	1
12	rs10875943	49282227	4	C2	55	1	9688	0	inf	3.199e-18	1
12	rs10875943	49282227	4	C3	55	1	6923	0	inf	1.429e-18	1
12	rs10875943	49282227	4	C4	55	1	6945	0	inf	1.772e-18	1
12	rs10875943	49282227	4	GENO_2DF	55	NA	NA	NA	NA	1.125e-36	1
12	rs902774	52880120	1	ADD	55	1	12550	0	inf	2.403e-19	1
12	rs902774	52880120	1	DOMDEV	55	1	14310	0	inf	2.749e-19	1
12	rs902774	52880120	1	C2	55	1	10280	0	inf	-5.111e-19	1
12	rs902774	52880120	1	C3	55	1	6902	0	inf	4.277e-19	1
12	rs902774	52880120	1	C4	55	1	6736	0	inf	4.882e-19	1
12	rs902774	52880120	1	GENO_2DF	55	NA	NA	NA	NA	7.889e-37	1
12	rs2279744	68808800	3	ADD	53	1	5907	0	inf	-5.043e-19	1
12	rs2279744	68808800	3	DOMDEV	53	1	7801	0	inf	-7.151e-19	1
12	rs2279744	68808800	3	C2	53	1	9627	0	inf	-3.777e-18	1
12	rs2279744	68808800	3	C3	53	1	7163	0	inf	-1.049e-18	1
12	rs2279744	68808800	3	C4	53	1	6896	0	inf	-1.109e-18	1
12	rs2279744	68808800	3	GENO_2DF	53	NA	NA	NA	NA	1.438e-36	1
12	rs2946834	102394036	2	ADD	55	1	6137	0	inf	1.206e-18	1
12	rs2946834	102394036	2	DOMDEV	55	1	7787	0	inf	5.338e-19	1
12	rs2946834	102394036	2	C2	55	1	9637	0	inf	1.048e-18	1
12	rs2946834	102394036	2	C3	55	1	6870	0	inf	5.932e-19	1
12	rs2946834	102394036	2	C4	55	1	6818	0	inf	1.243e-18	1
12	rs2946834	102394036	2	GENO_2DF	55	NA	NA	NA	NA	3.155e-36	1
12	rs7965399	102497908	4	ADD	57	NA	NA	NA	NA	NA	NA
12	rs7965399	102497908	4	DOMDEV	57	NA	NA	NA	NA	NA	NA
12	rs7965399	102497908	4	C2	57	NA	NA	NA	NA	NA	NA
12	rs7965399	102497908	4	C3	57	NA	NA	NA	NA	NA	NA
12	rs7965399	102497908	4	C4	57	NA	NA	NA	NA	NA	NA
12	rs7965399	102497908	4	GENO_2DF	57	NA	NA	NA	NA	NA	NA
15	rs28665122	101277522	1	ADD	46	NA	NA	NA	NA	NA	NA
15	rs28665122	101277522	1	DOMDEV	46	NA	NA	NA	NA	NA	NA
15	rs28665122	101277522	1	C2	46	NA	NA	NA	NA	NA	NA
15	rs28665122	101277522	1	C3	46	NA	NA	NA	NA	NA	NA
15	rs28665122	101277522	1	C4	46	NA	NA	NA	NA	NA	NA
15	rs28665122	101277522	1	GENO_2DF	46	NA	NA	NA	NA	NA	NA
15	rs4965373	101812395	1	ADD	47	1	9428	0	inf	-2.841e-19	1
15	rs4965373	101812395	1	DOMDEV	47	1	11410	0	inf	3.768e-19	1
15	rs4965373	101812395	1	C2	47	1	10540	0	inf	1.434e-18	1
15	rs4965373	101812395	1	C3	47	1	7366	0	inf	3.739e-19	1
15	rs4965373	101812395	1	C4	47	1	7496	0	inf	-2.367e-19	1
15	rs4965373	101812395	1	GENO_2DF	47	NA	NA	NA	NA	1.421e-37	1
16	rs1529916	8897333	2	ADD	52	1	9196	0	inf	2.556e-19	1
16	rs1529916	8897333	2	DOMDEV	52	1	10350	0	inf	-1.302e-19	1
16	rs1529916	8897333	2	C2	52	1	10330	0	inf	8.306e-19	1
16	rs1529916	8897333	2	C3	52	1	7294	0	inf	-3.947e-19	1
16	rs1529916	8897333	2	C4	52	1	7045	0	inf	7.605e-19	1
16	rs1529916	8897333	2	GENO_2DF	52	NA	NA	NA	NA	7.192e-38	1
16	rs9939609	53786615	1	ADD	56	1	4305	0	inf	-2.557e-18	1
16	rs9939609	53786615	1	DOMDEV	56	1	6859	0	inf	-1.714e-18	1
16	rs9939609	53786615	1	C2	56	1	9652	0	inf	-3.556e-18	1
16	rs9939609	53786615	1	C3	56	1	6737	0	inf	-1.28e-18	1
16	rs9939609	53786615	1	C4	56	1	6649	0	inf	-1.733e-18	1
16	rs9939609	53786615	1	GENO_2DF	56	NA	NA	NA	NA	1.055e-35	1
17	rs11545302	12899963	3	ADD	53	1	6556	0	inf	2.574e-19	1
17	rs11545302	12899963	3	DOMDEV	53	1	8894	0	inf	-5.618e-19	1
17	rs11545302	12899963	3	C2	53	1	10080	0	inf	1.62e-18	1
17	rs11545302	12899963	3	C3	53	1	6924	0	inf	-1.138e-19	1
17	rs11545302	12899963	3	C4	53	1	6832	0	inf	8.125e-19	1
17	rs11545302	12899963	3	GENO_2DF	53	NA	NA	NA	NA	3.204e-37	1
17	rs17552022	12994978	4	ADD	56	NA	NA	NA	NA	NA	NA
17	rs17552022	12994978	4	DOMDEV	56	NA	NA	NA	NA	NA	NA
17	rs17552022	12994978	4	C2	56	NA	NA	NA	NA	NA	NA
17	rs17552022	12994978	4	C3	56	NA	NA	NA	NA	NA	NA
17	rs17552022	12994978	4	C4	56	NA	NA	NA	NA	NA	NA
17	rs17552022	12994978	4	GENO_2DF	56	NA	NA	NA	NA	NA	NA
17	rs4054823	13721707	4	ADD	56	1	4598	0	inf	2.904e-18	1
17	rs4054823	13721707	4	DOMDEV	56	1	6824	0	inf	2.73e-19	1
17	rs4054823	13721707	4	C2	56	1	9943	0	inf	6.103e-18	1
17	rs4054823	13721707	4	C3	56	1	6717	0	inf	2.062e-18	1
17	rs4054823	13721707	4	C4	56	1	6657	0	inf	3.486e-18	1
17	rs4054823	13721707	4	GENO_2DF	56	NA	NA	NA	NA	8.619e-36	1
17	rs3094509	37702294	2	ADD	56	1	4681	0	inf	1.338e-18	1
17	rs3094509	37702294	2	DOMDEV	56	1	7594	0	inf	-2.641e-19	1
17	rs3094509	37702294	2	C2	56	1	9461	0	inf	1.202e-18	1
17	rs3094509	37702294	2	C3	56	1	6812	0	inf	5.417e-19	1
17	rs3094509	37702294	2	C4	56	1	6726	0	inf	1.192e-18	1
17	rs3094509	37702294	2	GENO_2DF	56	NA	NA	NA	NA	1.816e-36	1
17	rs4794758	37720433	2	ADD	57	1	7408	0	inf	1.666e-18	1
17	rs4794758	37720433	2	DOMDEV	57	1	9404	0	inf	-4.46e-21	1
17	rs4794758	37720433	2	C2	57	1	9565	0	inf	5.442e-18	1
17	rs4794758	37720433	2	C3	57	1	6613	0	inf	1.528e-18	1
17	rs4794758	37720433	2	C4	57	1	6683	0	inf	3.46e-18	1
17	rs4794758	37720433	2	GENO_2DF	57	NA	NA	NA	NA	4.903e-36	1
17	rs1016990	37728924	3	ADD	56	1	4928	0	inf	-4.859e-20	1
17	rs1016990	37728924	3	DOMDEV	56	1	7832	0	inf	7.022e-19	1
17	rs1016990	37728924	3	C2	56	1	9997	0	inf	-1.101e-18	1
17	rs1016990	37728924	3	C3	56	1	6824	0	inf	4.415e-19	1
17	rs1016990	37728924	3	C4	56	1	6662	0	inf	2.372e-19	1
17	rs1016990	37728924	3	GENO_2DF	56	NA	NA	NA	NA	5.441e-37	1
17	rs799923	41251931	1	ADD	56	1	9124	0	inf	8.011e-19	1
17	rs799923	41251931	1	DOMDEV	56	1	11090	0	inf	-1.371e-18	1
17	rs799923	41251931	1	C2	56	1	9535	0	inf	-1.448e-19	1
17	rs799923	41251931	1	C3	56	1	6735	0	inf	-4.231e-19	1
17	rs799923	41251931	1	C4	56	1	6934	0	inf	-4.205e-19	1
17	rs799923	41251931	1	GENO_2DF	56	NA	NA	NA	NA	2.019e-36	1
17	rs983085	69212061	3	ADD	54	1	4902	0	inf	-9.659e-19	1
17	rs983085	69212061	3	DOMDEV	54	1	7010	0	inf	3.055e-19	1
17	rs983085	69212061	3	C2	54	1	10070	0	inf	9.524e-19	1
17	rs983085	69212061	3	C3	54	1	7083	0	inf	1.187e-18	1
17	rs983085	69212061	3	C4	54	1	6787	0	inf	1.505e-18	1
17	rs983085	69212061	3	GENO_2DF	54	NA	NA	NA	NA	9.544e-37	1
17	rs1859962	71112612	3	ADD	54	1	4690	0	inf	-2.157e-18	1
17	rs1859962	71112612	3	DOMDEV	54	1	6736	0	inf	-8.98e-19	1
17	rs1859962	71112612	3	C2	54	1	10340	0	inf	-3.649e-18	1
17	rs1859962	71112612	3	C3	54	1	6824	0	inf	-3.056e-19	1
17	rs1859962	71112612	3	C4	54	1	6890	0	inf	-2.327e-18	1
17	rs1859962	71112612	3	GENO_2DF	54	NA	NA	NA	NA	5.234e-36	1
17	rs8066956	80034443	2	ADD	53	1	6150	0	inf	6.694e-19	1
17	rs8066956	80034443	2	DOMDEV	53	1	8188	0	inf	-9.427e-20	1
17	rs8066956	80034443	2	C2	53	1	10230	0	inf	1.163e-18	1
17	rs8066956	80034443	2	C3	53	1	6992	0	inf	-2.404e-19	1
17	rs8066956	80034443	2	C4	53	1	7051	0	inf	2.074e-19	1
17	rs8066956	80034443	2	GENO_2DF	53	NA	NA	NA	NA	5.428e-37	1
17	rs6502051	80059332	1	ADD	53	1	5161	0	inf	-8.176e-19	1
17	rs6502051	80059332	1	DOMDEV	53	1	7186	0	inf	3.322e-20	1
17	rs6502051	80059332	1	C2	53	1	10070	0	inf	1.885e-18	1
17	rs6502051	80059332	1	C3	53	1	6874	0	inf	1.182e-18	1
17	rs6502051	80059332	1	C4	53	1	6967	0	inf	1.919e-18	1
17	rs6502051	80059332	1	GENO_2DF	53	NA	NA	NA	NA	7.07e-37	1
17	rs1127678	82101611	1	ADD	22	1	13150	0	inf	-7.427e-19	1
17	rs1127678	82101611	1	DOMDEV	22	1	15520	0	inf	1.496e-18	1
17	rs1127678	82101611	1	C2	22	1	15840	0	inf	2.596e-19	1
17	rs1127678	82101611	1	C3	22	1	10800	0	inf	8.016e-19	1
17	rs1127678	82101611	1	C4	22	1	13400	0	inf	-6.042e-20	1
17	rs1127678	82101611	1	GENO_2DF	22	NA	NA	NA	NA	2.429e-36	1
19	rs713041	1106616	2	ADD	47	1	6386	0	inf	4.941e-19	1
19	rs713041	1106616	2	DOMDEV	47	1	8100	0	inf	-6.692e-19	1
19	rs713041	1106616	2	C2	47	1	10210	0	inf	-3.859e-18	1
19	rs713041	1106616	2	C3	47	1	7552	0	inf	-1.309e-18	1
19	rs713041	1106616	2	C4	47	1	7427	0	inf	-1.719e-18	1
19	rs713041	1106616	2	GENO_2DF	47	NA	NA	NA	NA	5.076e-37	1
19	rs8102476	38244973	2	ADD	56	1	5013	0	inf	-1.487e-18	1
19	rs8102476	38244973	2	DOMDEV	56	1	6884	0	inf	-1.34e-18	1
19	rs8102476	38244973	2	C2	56	1	9557	0	inf	-5.158e-18	1
19	rs8102476	38244973	2	C3	56	1	6732	0	inf	-2.148e-18	1
19	rs8102476	38244973	2	C4	56	1	6713	0	inf	-2.655e-18	1
19	rs8102476	38244973	2	GENO_2DF	56	NA	NA	NA	NA	5.142e-36	1
19	rs887391	41479716	4	ADD	55	1	7532	0	inf	-7.733e-19	1
19	rs887391	41479716	4	DOMDEV	55	1	9515	0	inf	5.612e-19	1
19	rs887391	41479716	4	C2	55	1	9567	0	inf	2.292e-18	1
19	rs887391	41479716	4	C3	55	1	7057	0	inf	-1.16e-19	1
19	rs887391	41479716	4	C4	55	1	6761	0	inf	1.059e-18	1
19	rs887391	41479716	4	GENO_2DF	55	NA	NA	NA	NA	6.011e-37	1
19	rs2659056	50832687	3	ADD	56	1	6501	0	inf	1.186e-18	1
19	rs2659056	50832687	3	DOMDEV	56	1	9040	0	inf	9.141e-19	1
19	rs2659056	50832687	3	C2	56	1	9823	0	inf	-2.347e-18	1
19	rs2659056	50832687	3	C3	56	1	6673	0	inf	-1.101e-18	1
19	rs2659056	50832687	3	C4	56	1	6676	0	inf	-1.836e-18	1
19	rs2659056	50832687	3	GENO_2DF	56	NA	NA	NA	NA	5.284e-36	1
19	rs17632542	50858501	4	ADD	57	NA	NA	NA	NA	NA	NA
19	rs17632542	50858501	4	DOMDEV	57	NA	NA	NA	NA	NA	NA
19	rs17632542	50858501	4	C2	57	NA	NA	NA	NA	NA	NA
19	rs17632542	50858501	4	C3	57	NA	NA	NA	NA	NA	NA
19	rs17632542	50858501	4	C4	57	NA	NA	NA	NA	NA	NA
19	rs17632542	50858501	4	GENO_2DF	57	NA	NA	NA	NA	NA	NA
19	rs1354774	50889862	4	ADD	57	1	6097	0	inf	1.115e-18	1
19	rs1354774	50889862	4	DOMDEV	57	1	7619	0	inf	4.171e-19	1
19	rs1354774	50889862	4	C2	57	1	9580	0	inf	-8.204e-19	1
19	rs1354774	50889862	4	C3	57	1	6653	0	inf	-2.8e-19	1
19	rs1354774	50889862	4	C4	57	1	6593	0	inf	-5.847e-19	1
19	rs1354774	50889862	4	GENO_2DF	57	NA	NA	NA	NA	2.627e-36	1
19	rs2659122	51363026	3	ADD	56	1	7456	0	inf	-6.453e-20	1
19	rs2659122	51363026	3	DOMDEV	56	1	9363	0	inf	-5.779e-19	1
19	rs2659122	51363026	3	C2	56	1	9551	0	inf	-2.418e-18	1
19	rs2659122	51363026	3	C3	56	1	6702	0	inf	-9.605e-19	1
19	rs2659122	51363026	3	C4	56	1	6686	0	inf	-1.503e-18	1
19	rs2659122	51363026	3	GENO_2DF	56	NA	NA	NA	NA	7.044e-37	1
19	rs1506684	51371419	2	ADD	56	1	4683	0	inf	-7.555e-19	1
19	rs1506684	51371419	2	DOMDEV	56	1	6631	0	inf	-4.585e-19	1
19	rs1506684	51371419	2	C2	56	1	9538	0	inf	1.39e-18	1
19	rs1506684	51371419	2	C3	56	1	6748	0	inf	-8.098e-19	1
19	rs1506684	51371419	2	C4	56	1	6670	0	inf	-6.156e-19	1
19	rs1506684	51371419	2	GENO_2DF	56	NA	NA	NA	NA	8.133e-37	1
20	rs3918256	44640959	3	ADD	56	1	6639	0	inf	8.558e-19	1
20	rs3918256	44640959	3	DOMDEV	56	1	8182	0	inf	-9.162e-19	1
20	rs3918256	44640959	3	C2	56	1	9615	0	inf	1.318e-18	1
20	rs3918256	44640959	3	C3	56	1	6676	0	inf	1.672e-18	1
20	rs3918256	44640959	3	C4	56	1	6684	0	inf	1.192e-18	1
20	rs3918256	44640959	3	GENO_2DF	56	NA	NA	NA	NA	1.001e-36	1
20	rs3787268	46013092	1	ADD	27	1	9186	0	inf	6.973e-19	1
20	rs3787268	46013092	1	DOMDEV	27	1	13760	0	inf	-1.703e-19	1
20	rs3787268	46013092	1	C2	27	1	18560	0	inf	-8.183e-19	1
20	rs3787268	46013092	1	C3	27	1	9610	0	inf	-7.079e-19	1
20	rs3787268	46013092	1	C4	27	1	11210	0	inf	-6.614e-19	1
20	rs3787268	46013092	1	GENO_2DF	27	NA	NA	NA	NA	5.462e-37	1
20	rs3787557	52783135	4	ADD	56	NA	NA	NA	NA	NA	NA
20	rs3787557	52783135	4	DOMDEV	56	NA	NA	NA	NA	NA	NA
20	rs3787557	52783135	4	C2	56	NA	NA	NA	NA	NA	NA
20	rs3787557	52783135	4	C3	56	NA	NA	NA	NA	NA	NA
20	rs3787557	52783135	4	C4	56	NA	NA	NA	NA	NA	NA
20	rs3787557	52783135	4	GENO_2DF	56	NA	NA	NA	NA	NA	NA
20	rs2762939	54164712	4	ADD	56	1	12730	0	inf	-9.181e-19	1
20	rs2762939	54164712	4	DOMDEV	56	1	13640	0	inf	3.248e-19	1
20	rs2762939	54164712	4	C2	56	1	9973	0	inf	-2.926e-18	1
20	rs2762939	54164712	4	C3	56	1	6781	0	inf	-4.533e-19	1
20	rs2762939	54164712	4	C4	56	1	6736	0	inf	4.901e-21	1
20	rs2762939	54164712	4	GENO_2DF	56	NA	NA	NA	NA	1.771e-36	1
20	rs2296241	54169680	3	ADD	54	1	5107	0	inf	1.474e-18	1
20	rs2296241	54169680	3	DOMDEV	54	1	6837	0	inf	7.321e-19	1
20	rs2296241	54169680	3	C2	54	1	10170	0	inf	2.469e-18	1
20	rs2296241	54169680	3	C3	54	1	7062	0	inf	7.43e-19	1
20	rs2296241	54169680	3	C4	54	1	6759	0	inf	7.668e-19	1
20	rs2296241	54169680	3	GENO_2DF	54	NA	NA	NA	NA	2.674e-36	1
23	rs5945619	51498820	4	ADD	56	NA	NA	NA	NA	NA	NA
23	rs5945619	51498820	4	DOMDEV	56	NA	NA	NA	NA	NA	NA
23	rs5945619	51498820	4	C2	56	NA	NA	NA	NA	NA	NA
23	rs5945619	51498820	4	C3	56	NA	NA	NA	NA	NA	NA
23	rs5945619	51498820	4	C4	56	NA	NA	NA	NA	NA	NA
23	rs5945619	51498820	4	GENO_2DF	56	NA	NA	NA	NA	NA	NA
23	rs5919432	67801708	4	ADD	56	NA	NA	NA	NA	NA	NA
23	rs5919432	67801708	4	DOMDEV	56	NA	NA	NA	NA	NA	NA
23	rs5919432	67801708	4	C2	56	NA	NA	NA	NA	NA	NA
23	rs5919432	67801708	4	C3	56	NA	NA	NA	NA	NA	NA
23	rs5919432	67801708	4	C4	56	NA	NA	NA	NA	NA	NA
23	rs5919432	67801708	4	GENO_2DF	56	NA	NA	NA	NA	NA	NA
